# Supplementary material for: A Secreted Bacterial Peptidylarginine Deiminase Can Neutralize Human Innate Immune Defenses
Source: PubMed Central journal article supplement (PMC6212822; doi:10.1128/mbio.01704-18), 2018-10-30

# Supplementary Figure S1

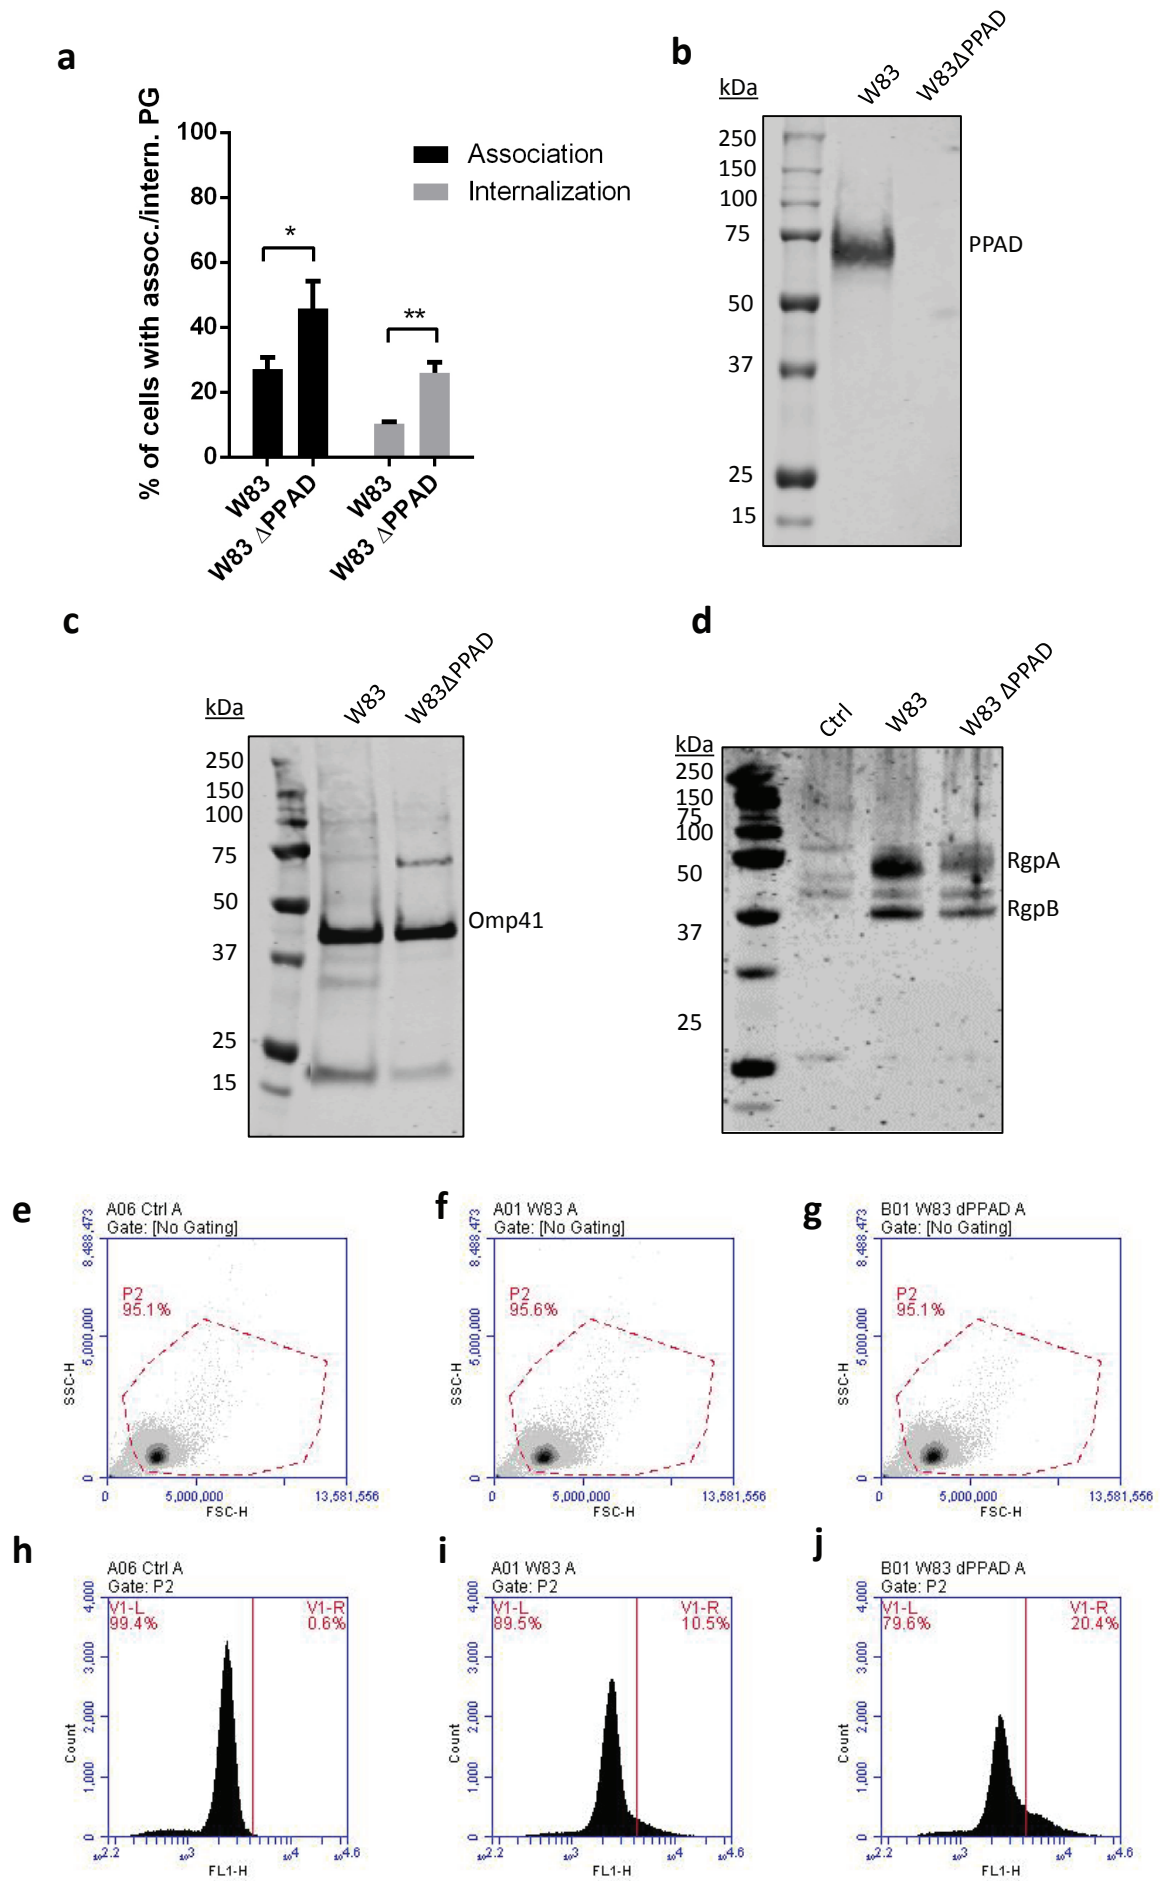

Supplement: mbo005184137sf1.pdf [file mbo005184137sf1.pdf]
