# Supplementary material for: A Secreted Bacterial Peptidylarginine Deiminase Can Neutralize Human Innate Immune Defenses
Source: PubMed Central journal article supplement (PMC6212822; doi:10.1128/mbio.01704-18), 2018-10-30
Supplement: mbo005184137sf5.pdf [file mbo005184137sf5.pdf]

## **Supplementary Figure S5**

# Histone H3

Uniprot ID: P68431

Citrullinated peptides identified when  
incubated with PPAD

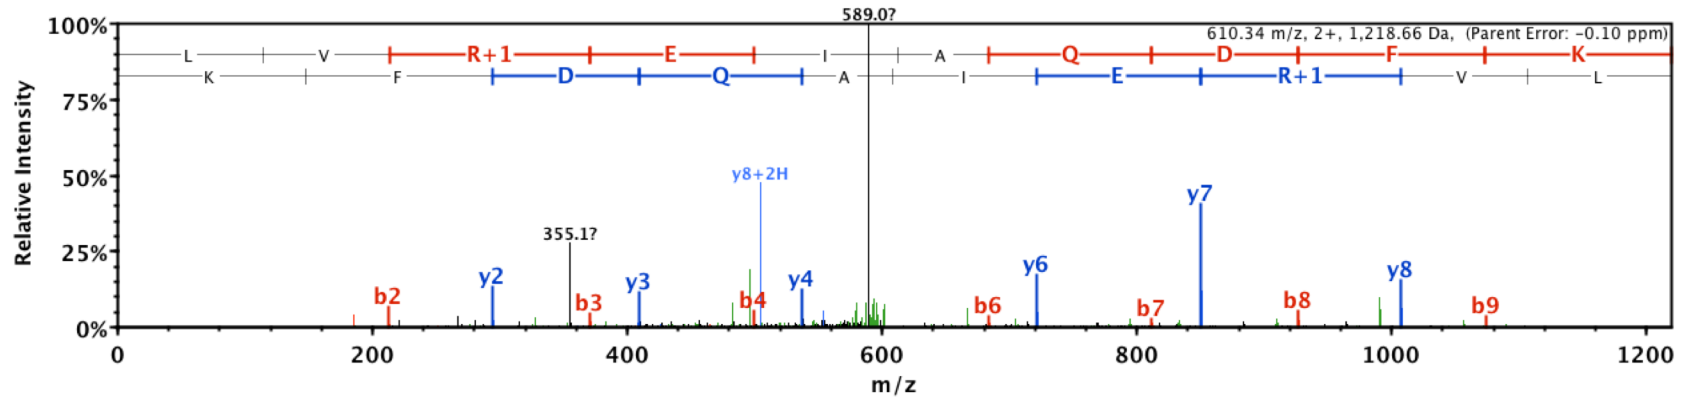

| B  | B Ions  | B+2H  | B-NH3   | B-H2O   | AA  | Y Ions  | Y+2H  | Y-NH3   | Y-H2O   | Y  |
|----|---------|-------|---------|---------|-----|---------|-------|---------|---------|----|
| 1  | 114.1   |       |         |         | L   | 1,219.7 | 610.3 | 1,202.6 | 1,201.7 | 10 |
| 2  | 213.2   |       |         |         | V   | 1,106.6 | 553.8 | 1,089.6 | 1,088.6 | 9  |
| 3  | 370.2   | 185.6 | 353.2   |         | R+1 | 1,007.5 | 504.3 | 990.5   | 989.5   | 8  |
| 4  | 499.3   | 250.1 | 482.3   | 481.3   | E   | 850.4   | 425.7 | 833.4   | 832.4   | 7  |
| 5  | 612.4   | 306.7 | 595.3   | 594.4   | I   | 721.4   | 361.2 | 704.4   | 703.4   | 6  |
| 6  | 683.4   | 342.2 | 666.4   | 665.4   | A   | 608.3   |       | 591.3   | 590.3   | 5  |
| 7  | 811.5   | 406.2 | 794.4   | 793.5   | Q   | 537.3   |       | 520.2   | 519.3   | 4  |
| 8  | 926.5   | 463.8 | 909.5   | 908.5   | D   | 409.2   |       | 392.2   | 391.2   | 3  |
| 9  | 1,073.6 | 537.3 | 1,056.5 | 1,055.6 | F   | 294.2   |       | 277.2   |         | 2  |
| 10 | 1,219.7 | 610.3 | 1,202.6 | 1,201.7 | K   | 147.1   |       | 130.1   |         | 1  |

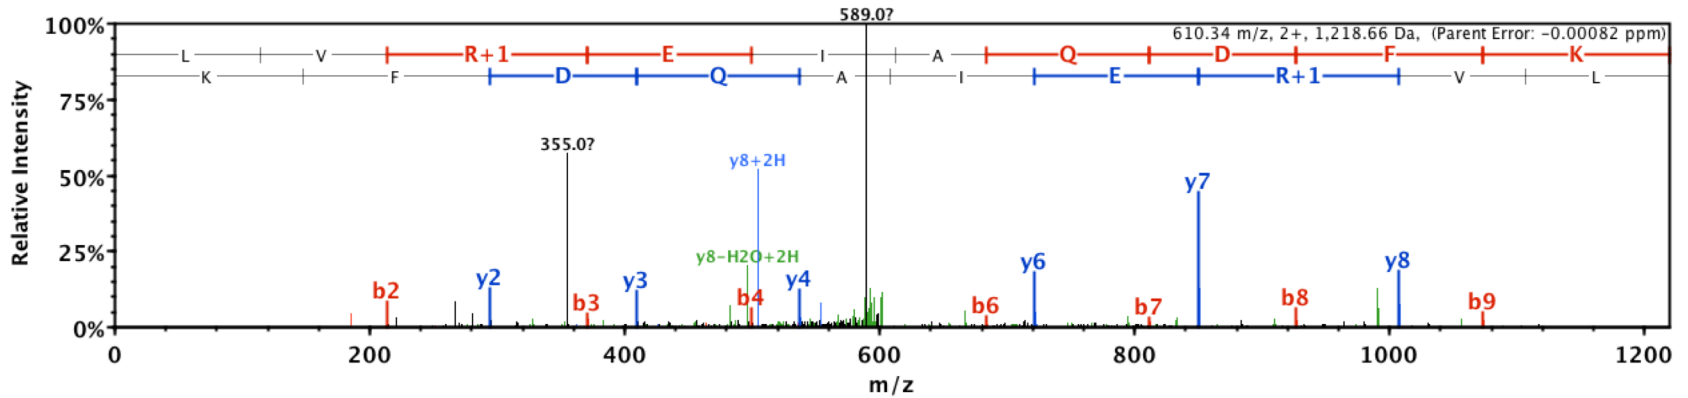

| B  | B Ions  | B+2H  | B-NH3   | B-H2O   | AA  | Y Ions  | Y+2H  | Y-NH3   | Y-H2O   | Y  |
|----|---------|-------|---------|---------|-----|---------|-------|---------|---------|----|
| 1  | 114.1   |       |         |         | L   | 1,219.7 | 610.3 | 1,202.6 | 1,201.7 | 10 |
| 2  | 213.2   |       |         |         | V   | 1,106.6 | 553.8 | 1,089.6 | 1,088.6 | 9  |
| 3  | 370.2   | 185.6 | 353.2   |         | R+1 | 1,007.5 | 504.3 | 990.5   | 989.5   | 8  |
| 4  | 499.3   | 250.1 | 482.3   | 481.3   | E   | 850.4   | 425.7 | 833.4   | 832.4   | 7  |
| 5  | 612.4   | 306.7 | 595.3   | 594.4   | I   | 721.4   | 361.2 | 704.4   | 703.4   | 6  |
| 6  | 683.4   | 342.2 | 666.4   | 665.4   | A   | 608.3   |       | 591.3   | 590.3   | 5  |
| 7  | 811.5   | 406.2 | 794.4   | 793.5   | Q   | 537.3   |       | 520.2   | 519.3   | 4  |
| 8  | 926.5   | 463.8 | 909.5   | 908.5   | D   | 409.2   |       | 392.2   | 391.2   | 3  |
| 9  | 1,073.6 | 537.3 | 1,056.5 | 1,055.6 | F   | 294.2   |       | 277.2   |         | 2  |
| 10 | 1,219.7 | 610.3 | 1,202.6 | 1,201.7 | K   | 147.1   |       | 130.1   |         | 1  |

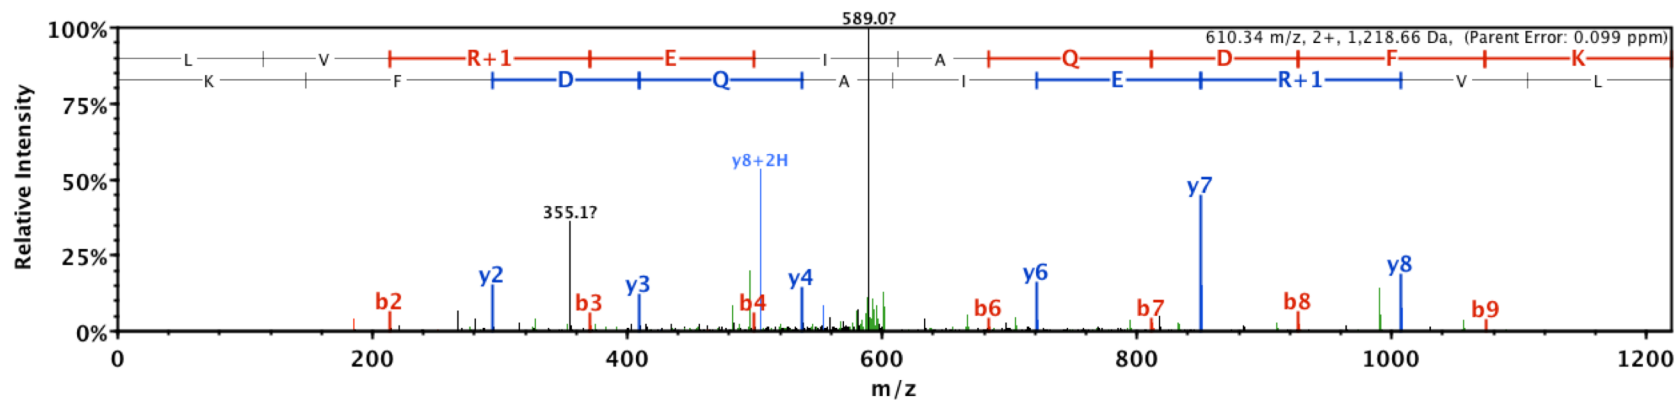

| B  | B Ions  | B+2H  | B-NH3   | B-H2O   | AA  | Y Ions  | Y+2H  | Y-NH3   | Y-H2O   | Y  |
|----|---------|-------|---------|---------|-----|---------|-------|---------|---------|----|
| 1  | 114.1   |       |         |         | L   | 1,219.7 | 610.3 | 1,202.6 | 1,201.7 | 10 |
| 2  | 213.2   |       |         |         | V   | 1,106.6 | 553.8 | 1,089.6 | 1,088.6 | 9  |
| 3  | 370.2   | 185.6 | 353.2   |         | R+1 | 1,007.5 | 504.3 | 990.5   | 989.5   | 8  |
| 4  | 499.3   | 250.1 | 482.3   | 481.3   | E   | 850.4   | 425.7 | 833.4   | 832.4   | 7  |
| 5  | 612.4   | 306.7 | 595.3   | 594.4   | I   | 721.4   | 361.2 | 704.4   | 703.4   | 6  |
| 6  | 683.4   | 342.2 | 666.4   | 665.4   | A   | 608.3   |       | 591.3   | 590.3   | 5  |
| 7  | 811.5   | 406.2 | 794.4   | 793.5   | Q   | 537.3   |       | 520.2   | 519.3   | 4  |
| 8  | 926.5   | 463.8 | 909.5   | 908.5   | D   | 409.2   |       | 392.2   | 391.2   | 3  |
| 9  | 1,073.6 | 537.3 | 1,056.5 | 1,055.6 | F   | 294.2   |       | 277.2   |         | 2  |
| 10 | 1,219.7 | 610.3 | 1,202.6 | 1,201.7 | K   | 147.1   |       | 130.1   |         | 1  |

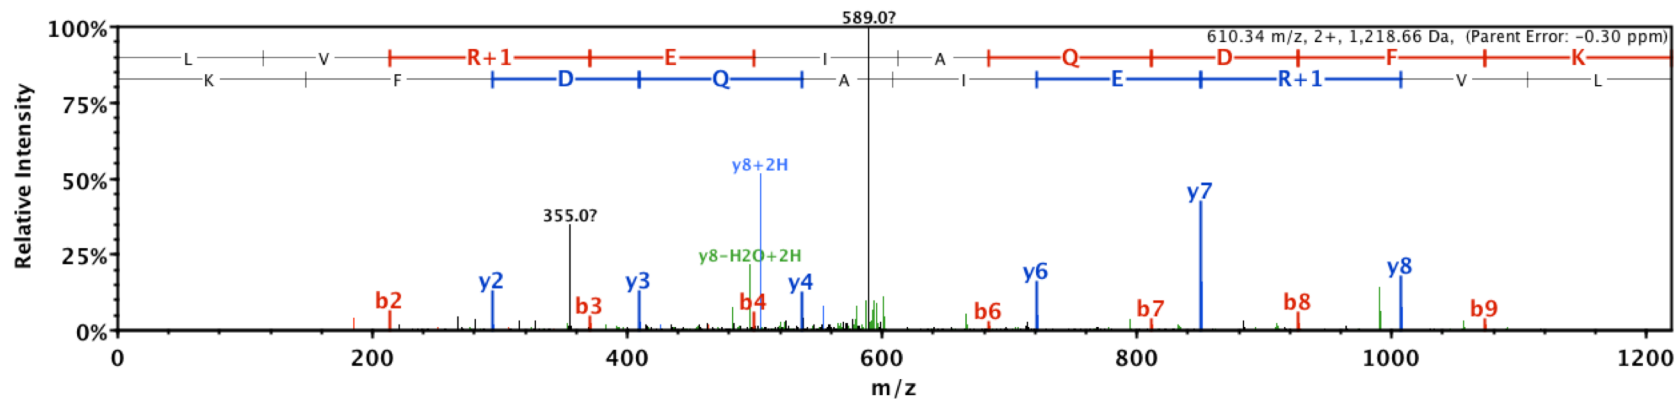

| B  | B Ions  | B+2H  | B-NH3   | B-H2O   | AA  | Y Ions  | Y+2H  | Y-NH3   | Y-H2O   | Y  |
|----|---------|-------|---------|---------|-----|---------|-------|---------|---------|----|
| 1  | 114.1   |       |         |         | L   | 1,219.7 | 610.3 | 1,202.6 | 1,201.7 | 10 |
| 2  | 213.2   |       |         |         | V   | 1,106.6 | 553.8 | 1,089.6 | 1,088.6 | 9  |
| 3  | 370.2   | 185.6 | 353.2   |         | R+1 | 1,007.5 | 504.3 | 990.5   | 989.5   | 8  |
| 4  | 499.3   | 250.1 | 482.3   | 481.3   | E   | 850.4   | 425.7 | 833.4   | 832.4   | 7  |
| 5  | 612.4   | 306.7 | 595.3   | 594.4   | I   | 721.4   | 361.2 | 704.4   | 703.4   | 6  |
| 6  | 683.4   | 342.2 | 666.4   | 665.4   | A   | 608.3   |       | 591.3   | 590.3   | 5  |
| 7  | 811.5   | 406.2 | 794.4   | 793.5   | Q   | 537.3   |       | 520.2   | 519.3   | 4  |
| 8  | 926.5   | 463.8 | 909.5   | 908.5   | D   | 409.2   |       | 392.2   | 391.2   | 3  |
| 9  | 1,073.6 | 537.3 | 1,056.5 | 1,055.6 | F   | 294.2   |       | 277.2   |         | 2  |
| 10 | 1,219.7 | 610.3 | 1,202.6 | 1,201.7 | K   | 147.1   |       | 130.1   |         | 1  |

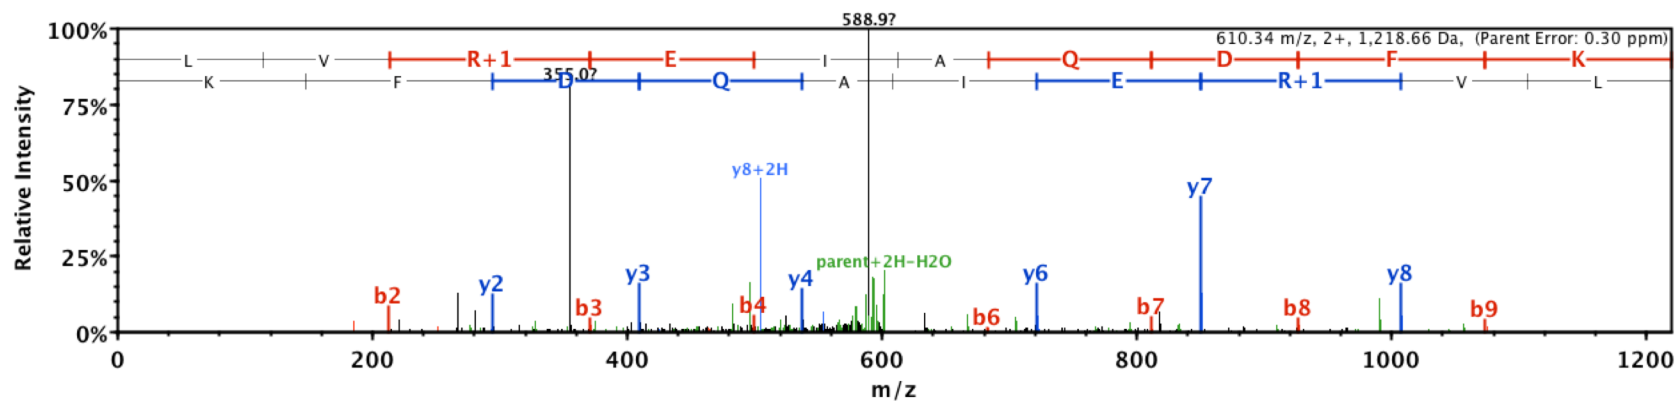

| B  | B Ions  | B+2H  | B-NH3   | B-H2O   | AA  | Y Ions  | Y+2H  | Y-NH3   | Y-H2O   | Y  |
|----|---------|-------|---------|---------|-----|---------|-------|---------|---------|----|
| 1  | 114.1   |       |         |         | L   | 1,219.7 | 610.3 | 1,202.6 | 1,201.7 | 10 |
| 2  | 213.2   |       |         |         | V   | 1,106.6 | 553.8 | 1,089.6 | 1,088.6 | 9  |
| 3  | 370.2   | 185.6 | 353.2   |         | R+1 | 1,007.5 | 504.3 | 990.5   | 989.5   | 8  |
| 4  | 499.3   | 250.1 | 482.3   | 481.3   | E   | 850.4   | 425.7 | 833.4   | 832.4   | 7  |
| 5  | 612.4   | 306.7 | 595.3   | 594.4   | I   | 721.4   | 361.2 | 704.4   | 703.4   | 6  |
| 6  | 683.4   | 342.2 | 666.4   | 665.4   | A   | 608.3   |       | 591.3   | 590.3   | 5  |
| 7  | 811.5   | 406.2 | 794.4   | 793.5   | Q   | 537.3   |       | 520.2   | 519.3   | 4  |
| 8  | 926.5   | 463.8 | 909.5   | 908.5   | D   | 409.2   |       | 392.2   | 391.2   | 3  |
| 9  | 1,073.6 | 537.3 | 1,056.5 | 1,055.6 | F   | 294.2   |       | 277.2   |         | 2  |
| 10 | 1,219.7 | 610.3 | 1,202.6 | 1,201.7 | K   | 147.1   |       | 130.1   |         | 1  |

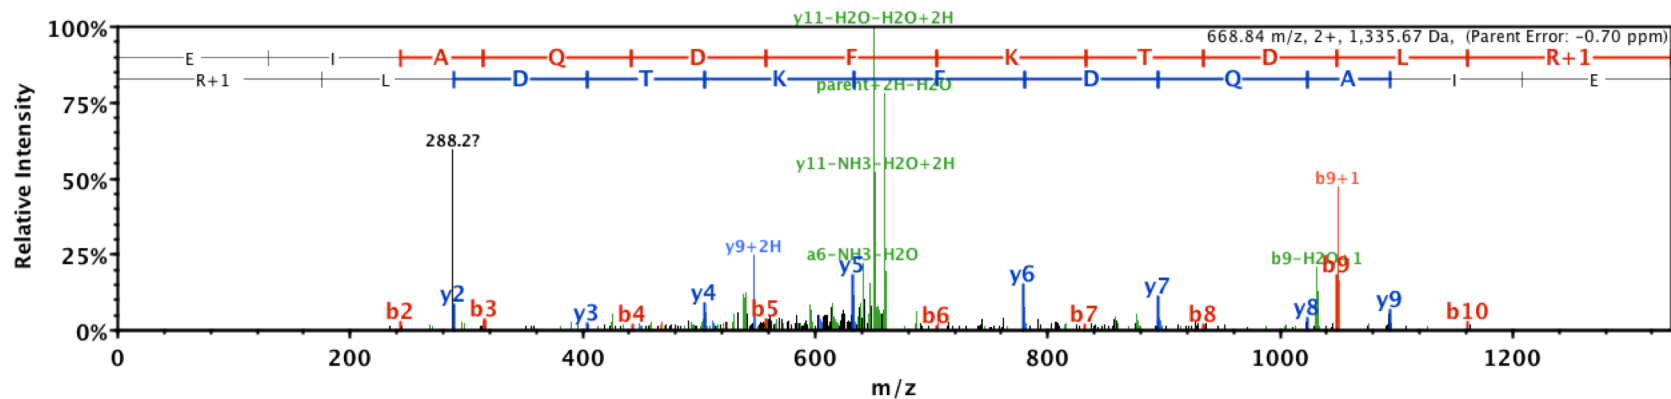

| B  | B Ions  | B+2H  | B-NH3   | B-H2O   | AA  | Y Ions  | Y+2H  | Y-NH3   | Y-H2O   | Y  |
|----|---------|-------|---------|---------|-----|---------|-------|---------|---------|----|
| 1  | 130.0   |       |         | 112.0   | E   | 1,336.7 | 668.8 | 1,319.6 | 1,318.7 | 11 |
| 2  | 243.1   |       |         | 225.1   | I   | 1,207.6 | 604.3 | 1,190.6 | 1,189.6 | 10 |
| 3  | 314.2   |       |         | 296.2   | A   | 1,094.5 | 547.8 | 1,077.5 | 1,076.5 | 9  |
| 4  | 442.2   |       | 425.2   | 424.2   | Q   | 1,023.5 | 512.3 | 1,006.5 | 1,005.5 | 8  |
| 5  | 557.3   |       | 540.2   | 539.2   | D   | 895.5   | 448.2 | 878.4   | 877.4   | 7  |
| 6  | 704.3   | 352.7 | 687.3   | 686.3   | F   | 780.4   | 390.7 | 763.4   | 762.4   | 6  |
| 7  | 832.4   | 416.7 | 815.4   | 814.4   | K   | 633.4   | 317.2 | 616.3   | 615.3   | 5  |
| 8  | 933.5   | 467.2 | 916.4   | 915.5   | T   | 505.3   |       | 488.2   | 487.3   | 4  |
| 9  | 1,048.5 | 524.8 | 1,031.5 | 1,030.5 | D   | 404.2   |       | 387.2   | 386.2   | 3  |
| 10 | 1,161.6 | 581.3 | 1,144.6 | 1,143.6 | L   | 289.2   |       | 272.2   |         | 2  |
| 11 | 1,336.7 | 668.8 | 1,319.6 | 1,318.7 | R+1 | 176.1   |       | 159.1   |         | 1  |



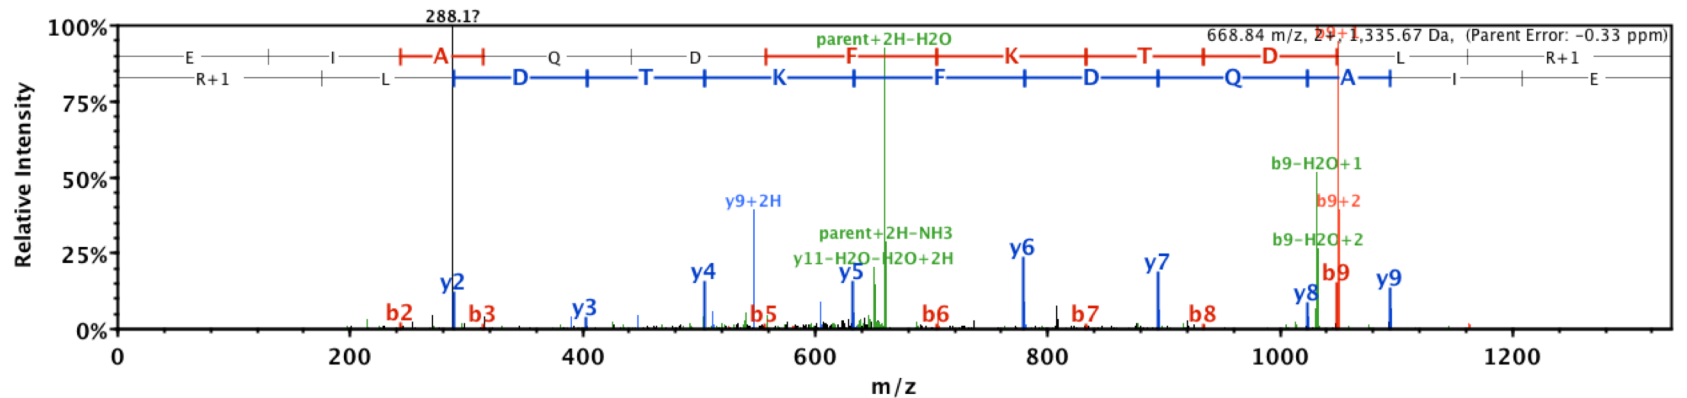

| B  | B Ions  | B+2H  | B-NH3   | B-H2O   | AA  | Y Ions  | Y+2H  | Y-NH3   | Y-H2O   | Y  |
|----|---------|-------|---------|---------|-----|---------|-------|---------|---------|----|
| 1  | 130.0   |       |         | 112.0   | E   | 1,336.7 | 668.8 | 1,319.6 | 1,318.7 | 11 |
| 2  | 243.1   |       |         | 225.1   | I   | 1,207.6 | 604.3 | 1,190.6 | 1,189.6 | 10 |
| 3  | 314.2   |       |         | 296.2   | A   | 1,094.5 | 547.8 | 1,077.5 | 1,076.5 | 9  |
| 4  | 442.2   |       | 425.2   | 424.2   | Q   | 1,023.5 | 512.3 | 1,006.5 | 1,005.5 | 8  |
| 5  | 557.3   |       | 540.2   | 539.2   | D   | 895.5   | 448.2 | 878.4   | 877.4   | 7  |
| 6  | 704.3   | 352.7 | 687.3   | 686.3   | F   | 780.4   | 390.7 | 763.4   | 762.4   | 6  |
| 7  | 832.4   | 416.7 | 815.4   | 814.4   | K   | 633.4   | 317.2 | 616.3   | 615.3   | 5  |
| 8  | 933.5   | 467.2 | 916.4   | 915.5   | T   | 505.3   |       | 488.2   | 487.3   | 4  |
| 9  | 1,048.5 | 524.8 | 1,031.5 | 1,030.5 | D   | 404.2   |       | 387.2   | 386.2   | 3  |
| 10 | 1,161.6 | 581.3 | 1,144.6 | 1,143.6 | L   | 289.2   |       | 272.2   |         | 2  |
| 11 | 1,336.7 | 668.8 | 1,319.6 | 1,318.7 | R+1 | 176.1   |       | 159.1   |         | 1  |

# Histone H3

Uniprot ID: P68431

Citrullinated peptides identified when  
incubated with human PAD2

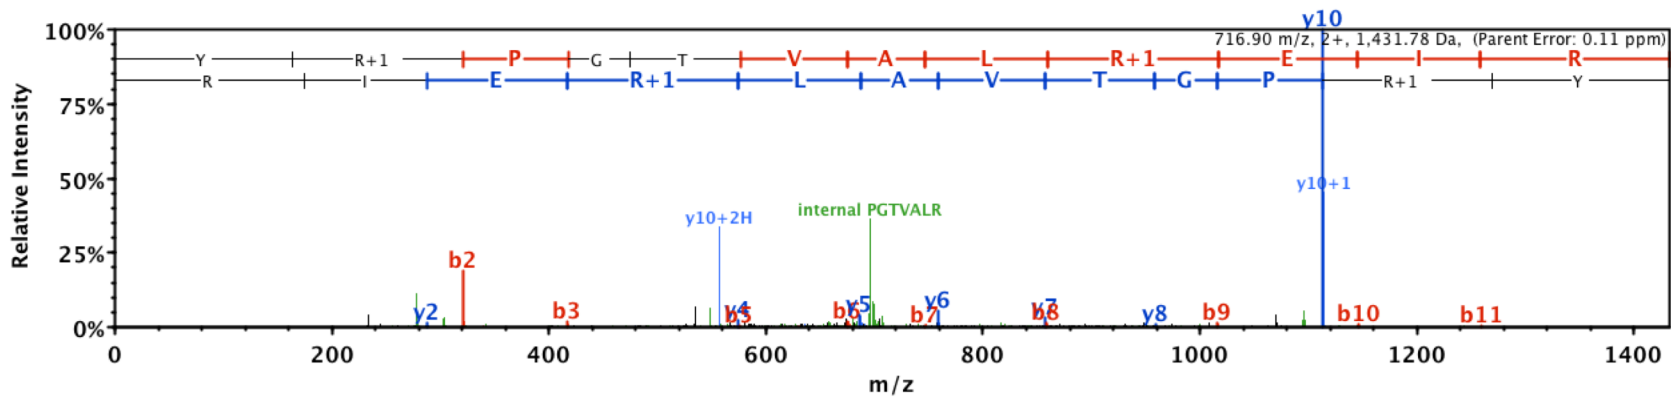

| B  | B Ions  | B+2H  | B-NH3   | B-H2O   | AA  | Y Ions  | Y+2H  | Y-NH3   | Y-H2O   | Y  |
|----|---------|-------|---------|---------|-----|---------|-------|---------|---------|----|
| 1  | 164.1   |       |         | 146.1   | Y   | 1,432.8 | 716.9 | 1,415.8 | 1,414.8 | 12 |
| 2  | 321.2   | 161.1 | 304.1   | 303.1   | R+1 | 1,269.7 | 635.4 | 1,252.7 | 1,251.7 | 11 |
| 3  | 418.2   | 209.6 | 401.2   | 400.2   | P   | 1,112.6 | 556.8 | 1,095.6 | 1,094.6 | 10 |
| 4  | 475.2   | 238.1 | 458.2   | 457.2   | G   | 1,015.6 | 508.3 | 998.6   | 997.6   | 9  |
| 5  | 576.3   | 288.6 | 559.3   | 558.3   | T   | 958.6   | 479.8 | 941.5   | 940.6   | 8  |
| 6  | 675.3   | 338.2 | 658.3   | 657.3   | V   | 857.5   | 429.3 | 840.5   | 839.5   | 7  |
| 7  | 746.4   | 373.7 | 729.4   | 728.4   | A   | 758.5   | 379.7 | 741.4   | 740.4   | 6  |
| 8  | 859.5   | 430.2 | 842.4   | 841.5   | L   | 687.4   | 344.2 | 670.4   | 669.4   | 5  |
| 9  | 1,016.6 | 508.8 | 999.5   | 998.5   | R+1 | 574.3   | 287.7 | 557.3   | 556.3   | 4  |
| 10 | 1,145.6 | 573.3 | 1,128.6 | 1,127.6 | E   | 417.2   |       | 400.2   | 399.2   | 3  |
| 11 | 1,258.7 | 629.8 | 1,241.7 | 1,240.7 | I   | 288.2   |       | 271.2   | 270.2   | 2  |
| 12 | 1,432.8 | 716.9 | 1,415.8 | 1,414.8 | R   | 175.1   |       | 158.1   | 157.1   | 1  |

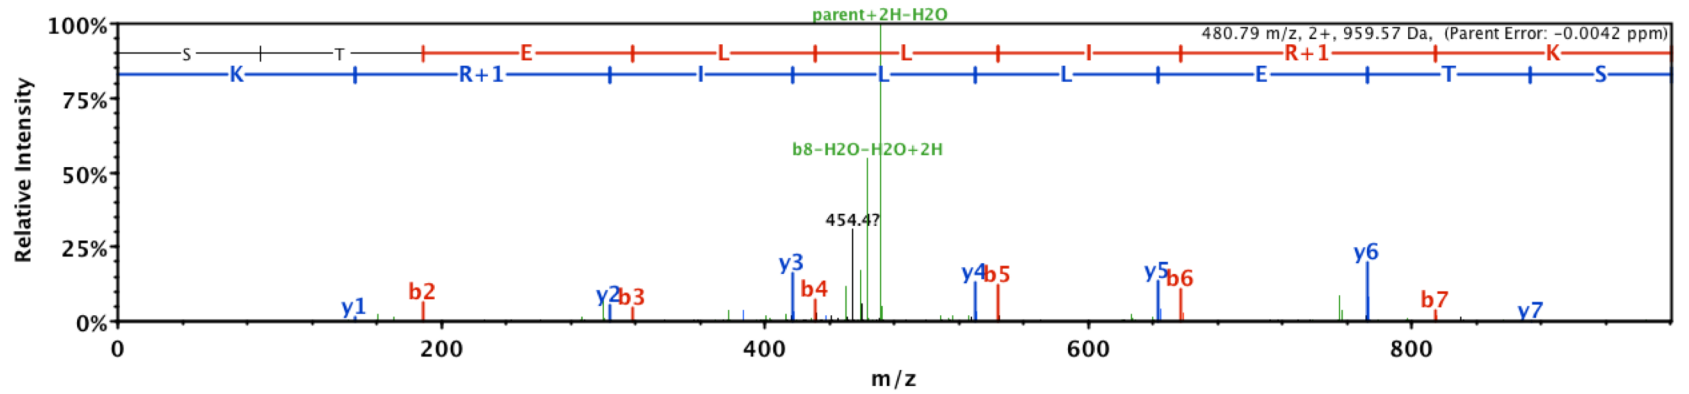

| B | B Ions | B+2H  | B-NH3 | B-H2O | AA  | Y Ions | Y+2H  | Y-NH3 | Y-H2O | Y |
|---|--------|-------|-------|-------|-----|--------|-------|-------|-------|---|
| 1 | 88.0   |       |       | 70.0  | S   | 960.6  | 480.8 | 943.5 | 942.6 | 8 |
| 2 | 189.1  |       |       | 171.1 | T   | 873.5  | 437.3 | 856.5 | 855.5 | 7 |
| 3 | 318.1  |       |       | 300.1 | E   | 772.5  | 386.8 | 755.5 | 754.5 | 6 |
| 4 | 431.2  |       |       | 413.2 | L   | 643.5  | 322.2 | 626.4 |       | 5 |
| 5 | 544.3  |       |       | 526.3 | L   | 530.4  | 265.7 | 513.3 |       | 4 |
| 6 | 657.4  | 329.2 |       | 639.4 | I   | 417.3  | 209.1 | 400.3 |       | 3 |
| 7 | 814.5  | 407.7 | 797.4 | 796.5 | R+1 | 304.2  | 152.6 | 287.2 |       | 2 |
| 8 | 960.6  | 480.8 | 943.5 | 942.6 | K   | 147.1  |       | 130.1 |       | 1 |

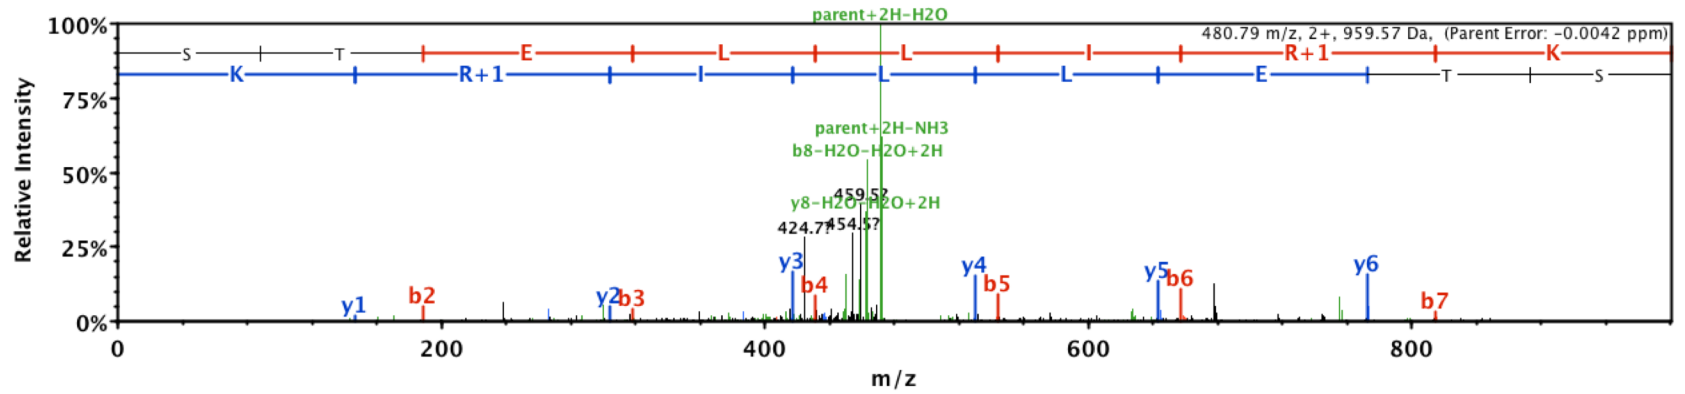

| B | B Ions | B+2H  | B-NH3 | B-H2O | AA  | Y Ions | Y+2H  | Y-NH3 | Y-H2O | Y |
|---|--------|-------|-------|-------|-----|--------|-------|-------|-------|---|
| 1 | 88.0   |       |       | 70.0  | S   | 960.6  | 480.8 | 943.5 | 942.6 | 8 |
| 2 | 189.1  |       |       | 171.1 | T   | 873.5  | 437.3 | 856.5 | 855.5 | 7 |
| 3 | 318.1  |       |       | 300.1 | E   | 772.5  | 386.8 | 755.5 | 754.5 | 6 |
| 4 | 431.2  |       |       | 413.2 | L   | 643.5  | 322.2 | 626.4 |       | 5 |
| 5 | 544.3  |       |       | 526.3 | L   | 530.4  | 265.7 | 513.3 |       | 4 |
| 6 | 657.4  | 329.2 |       | 639.4 | I   | 417.3  | 209.1 | 400.3 |       | 3 |
| 7 | 814.5  | 407.7 | 797.4 | 796.5 | R+1 | 304.2  | 152.6 | 287.2 |       | 2 |
| 8 | 960.6  | 480.8 | 943.5 | 942.6 | K   | 147.1  |       | 130.1 |       | 1 |

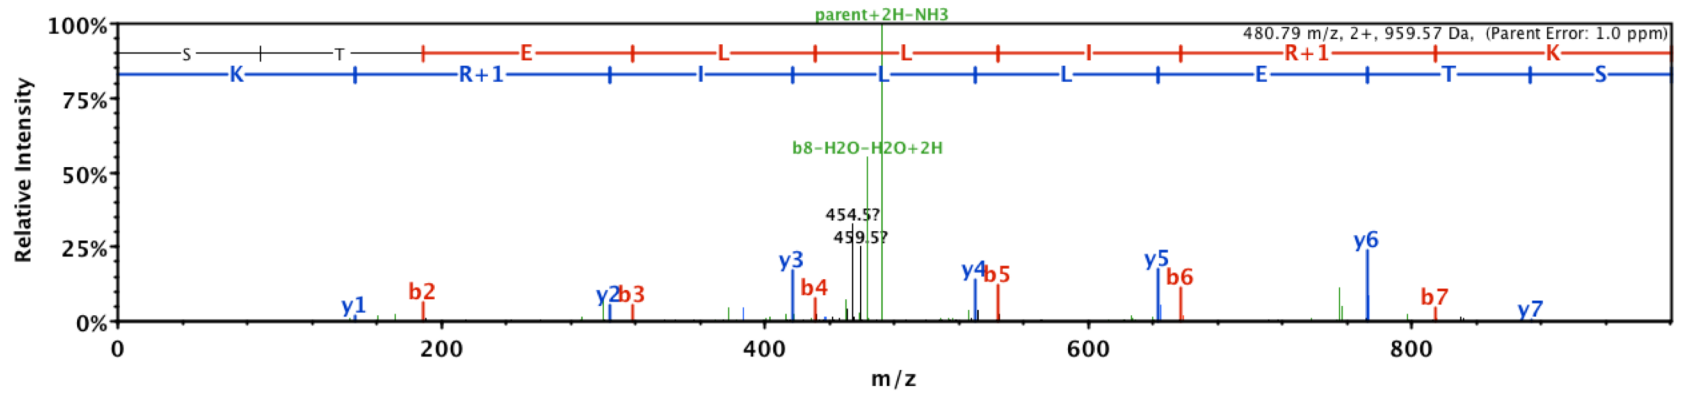

| B | B Ions | B+2H  | B-NH3 | B-H2O | AA  | Y Ions | Y+2H  | Y-NH3 | Y-H2O | Y |
|---|--------|-------|-------|-------|-----|--------|-------|-------|-------|---|
| 1 | 88.0   |       |       | 70.0  | S   | 960.6  | 480.8 | 943.5 | 942.6 | 8 |
| 2 | 189.1  |       |       | 171.1 | T   | 873.5  | 437.3 | 856.5 | 855.5 | 7 |
| 3 | 318.1  |       |       | 300.1 | E   | 772.5  | 386.8 | 755.5 | 754.5 | 6 |
| 4 | 431.2  |       |       | 413.2 | L   | 643.5  | 322.2 | 626.4 |       | 5 |
| 5 | 544.3  |       |       | 526.3 | L   | 530.4  | 265.7 | 513.3 |       | 4 |
| 6 | 657.4  | 329.2 |       | 639.4 | I   | 417.3  | 209.1 | 400.3 |       | 3 |
| 7 | 814.5  | 407.7 | 797.4 | 796.5 | R+1 | 304.2  | 152.6 | 287.2 |       | 2 |
| 8 | 960.6  | 480.8 | 943.5 | 942.6 | K   | 147.1  |       | 130.1 |       | 1 |

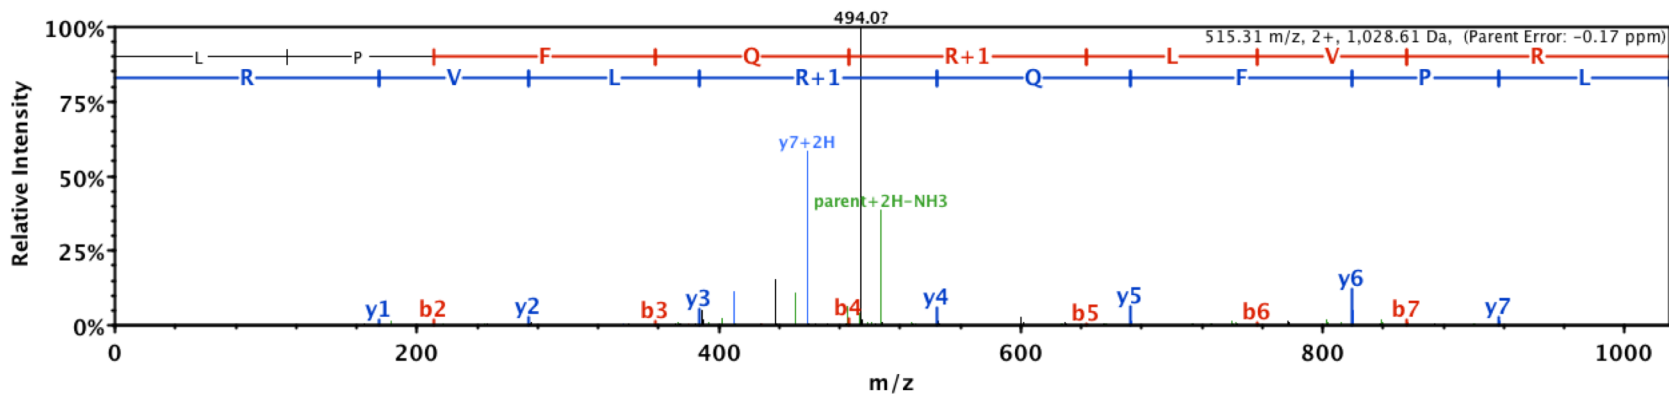

| B | B Ions  | B+2H  | B-NH3   | B-H2O | AA  | Y Ions  | Y+2H  | Y-NH3   | Y-H2O | Y |
|---|---------|-------|---------|-------|-----|---------|-------|---------|-------|---|
| 1 | 114.1   |       |         |       | L   | 1,029.6 | 515.3 | 1,012.6 |       | 8 |
| 2 | 211.1   |       |         |       | P   | 916.5   | 458.8 | 899.5   |       | 7 |
| 3 | 358.2   |       |         |       | F   | 819.5   | 410.2 | 802.5   |       | 6 |
| 4 | 486.3   |       | 469.2   |       | Q   | 672.4   | 336.7 | 655.4   |       | 5 |
| 5 | 643.4   | 322.2 | 626.3   |       | R+1 | 544.4   | 272.7 | 527.3   |       | 4 |
| 6 | 756.4   | 378.7 | 739.4   |       | L   | 387.3   |       | 370.2   |       | 3 |
| 7 | 855.5   | 428.3 | 838.5   |       | V   | 274.2   |       | 257.2   |       | 2 |
| 8 | 1,029.6 | 515.3 | 1,012.6 |       | R   | 175.1   |       | 158.1   |       | 1 |

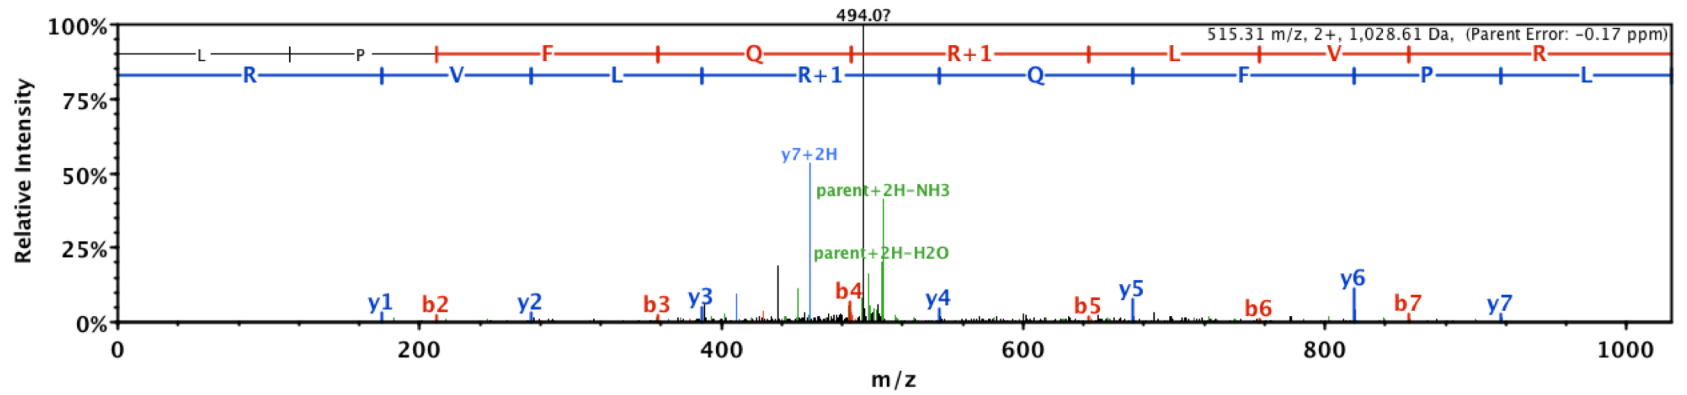

| B | B Ions  | B+2H  | B-NH3   | B-H2O | AA  | Y Ions  | Y+2H  | Y-NH3   | Y-H2O | Y |
|---|---------|-------|---------|-------|-----|---------|-------|---------|-------|---|
| 1 | 114.1   |       |         |       | L   | 1,029.6 | 515.3 | 1,012.6 |       | 8 |
| 2 | 211.1   |       |         |       | P   | 916.5   | 458.8 | 899.5   |       | 7 |
| 3 | 358.2   |       |         |       | F   | 819.5   | 410.2 | 802.5   |       | 6 |
| 4 | 486.3   |       | 469.2   |       | Q   | 672.4   | 336.7 | 655.4   |       | 5 |
| 5 | 643.4   | 322.2 | 626.3   |       | R+1 | 544.4   | 272.7 | 527.3   |       | 4 |
| 6 | 756.4   | 378.7 | 739.4   |       | L   | 387.3   |       | 370.2   |       | 3 |
| 7 | 855.5   | 428.3 | 838.5   |       | V   | 274.2   |       | 257.2   |       | 2 |
| 8 | 1,029.6 | 515.3 | 1,012.6 |       | R   | 175.1   |       | 158.1   |       | 1 |



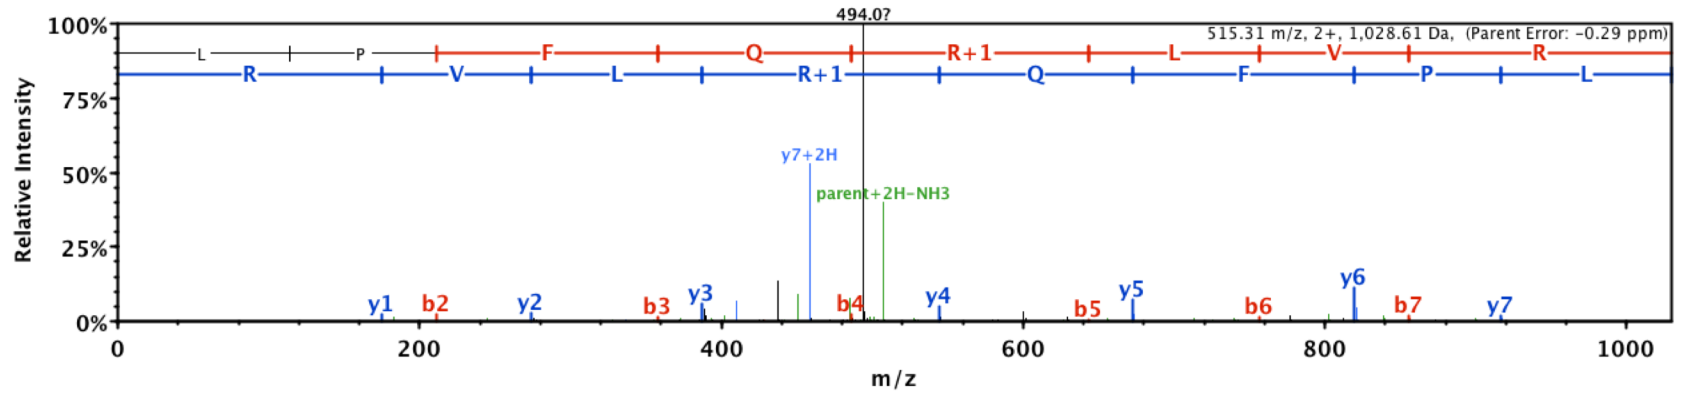

| B | B Ions  | B+2H  | B-NH3   | B-H2O | AA  | Y Ions  | Y+2H  | Y-NH3   | Y-H2O | Y |
|---|---------|-------|---------|-------|-----|---------|-------|---------|-------|---|
| 1 | 114.1   |       |         |       | L   | 1,029.6 | 515.3 | 1,012.6 |       | 8 |
| 2 | 211.1   |       |         |       | P   | 916.5   | 458.8 | 899.5   |       | 7 |
| 3 | 358.2   |       |         |       | F   | 819.5   | 410.2 | 802.5   |       | 6 |
| 4 | 486.3   |       | 469.2   |       | Q   | 672.4   | 336.7 | 655.4   |       | 5 |
| 5 | 643.4   | 322.2 | 626.3   |       | R+1 | 544.4   | 272.7 | 527.3   |       | 4 |
| 6 | 756.4   | 378.7 | 739.4   |       | L   | 387.3   |       | 370.2   |       | 3 |
| 7 | 855.5   | 428.3 | 838.5   |       | V   | 274.2   |       | 257.2   |       | 2 |
| 8 | 1,029.6 | 515.3 | 1,012.6 |       | R   | 175.1   |       | 158.1   |       | 1 |

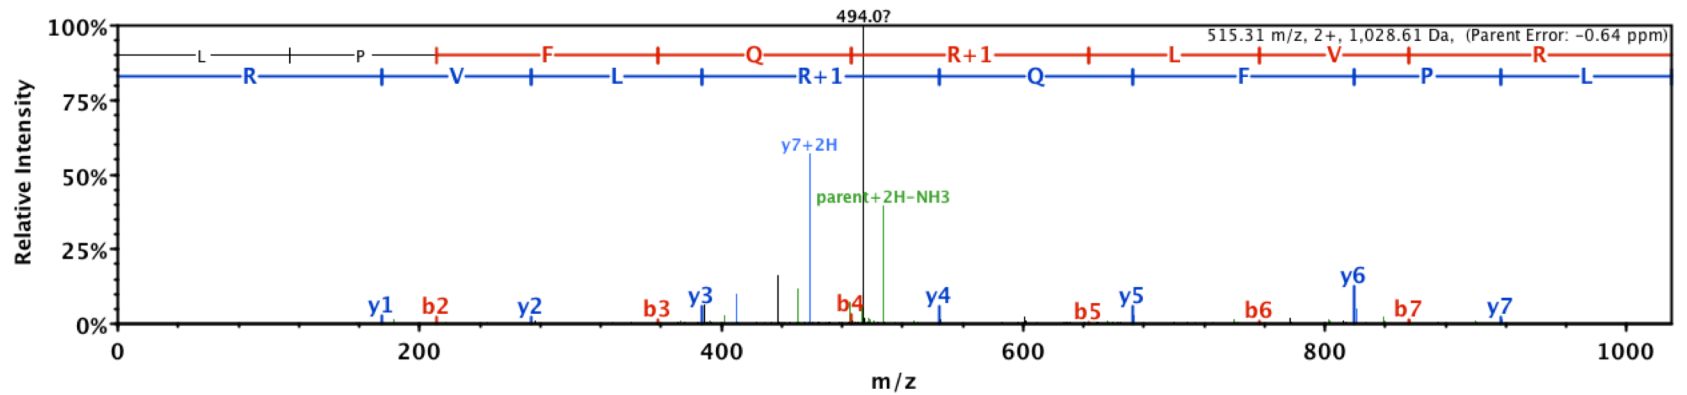

| B | B Ions  | B+2H  | B-NH3   | B-H2O | AA  | Y Ions  | Y+2H  | Y-NH3   | Y-H2O | Y |
|---|---------|-------|---------|-------|-----|---------|-------|---------|-------|---|
| 1 | 114.1   |       |         |       | L   | 1,029.6 | 515.3 | 1,012.6 |       | 8 |
| 2 | 211.1   |       |         |       | P   | 916.5   | 458.8 | 899.5   |       | 7 |
| 3 | 358.2   |       |         |       | F   | 819.5   | 410.2 | 802.5   |       | 6 |
| 4 | 486.3   |       | 469.2   |       | Q   | 672.4   | 336.7 | 655.4   |       | 5 |
| 5 | 643.4   | 322.2 | 626.3   |       | R+1 | 544.4   | 272.7 | 527.3   |       | 4 |
| 6 | 756.4   | 378.7 | 739.4   |       | L   | 387.3   |       | 370.2   |       | 3 |
| 7 | 855.5   | 428.3 | 838.5   |       | V   | 274.2   |       | 257.2   |       | 2 |
| 8 | 1,029.6 | 515.3 | 1,012.6 |       | R   | 175.1   |       | 158.1   |       | 1 |

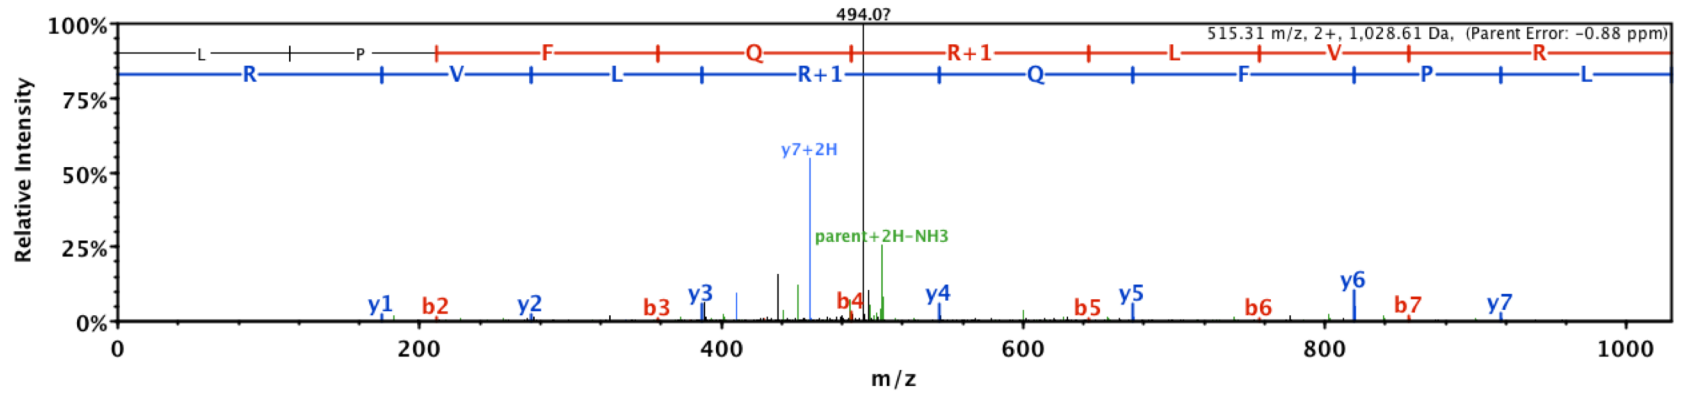

| B | B Ions  | B+2H  | B-NH3   | B-H2O | AA  | Y Ions  | Y+2H  | Y-NH3   | Y-H2O | Y |
|---|---------|-------|---------|-------|-----|---------|-------|---------|-------|---|
| 1 | 114.1   |       |         |       | L   | 1,029.6 | 515.3 | 1,012.6 |       | 8 |
| 2 | 211.1   |       |         |       | P   | 916.5   | 458.8 | 899.5   |       | 7 |
| 3 | 358.2   |       |         |       | F   | 819.5   | 410.2 | 802.5   |       | 6 |
| 4 | 486.3   |       | 469.2   |       | Q   | 672.4   | 336.7 | 655.4   |       | 5 |
| 5 | 643.4   | 322.2 | 626.3   |       | R+1 | 544.4   | 272.7 | 527.3   |       | 4 |
| 6 | 756.4   | 378.7 | 739.4   |       | L   | 387.3   |       | 370.2   |       | 3 |
| 7 | 855.5   | 428.3 | 838.5   |       | V   | 274.2   |       | 257.2   |       | 2 |
| 8 | 1,029.6 | 515.3 | 1,012.6 |       | R   | 175.1   |       | 158.1   |       | 1 |

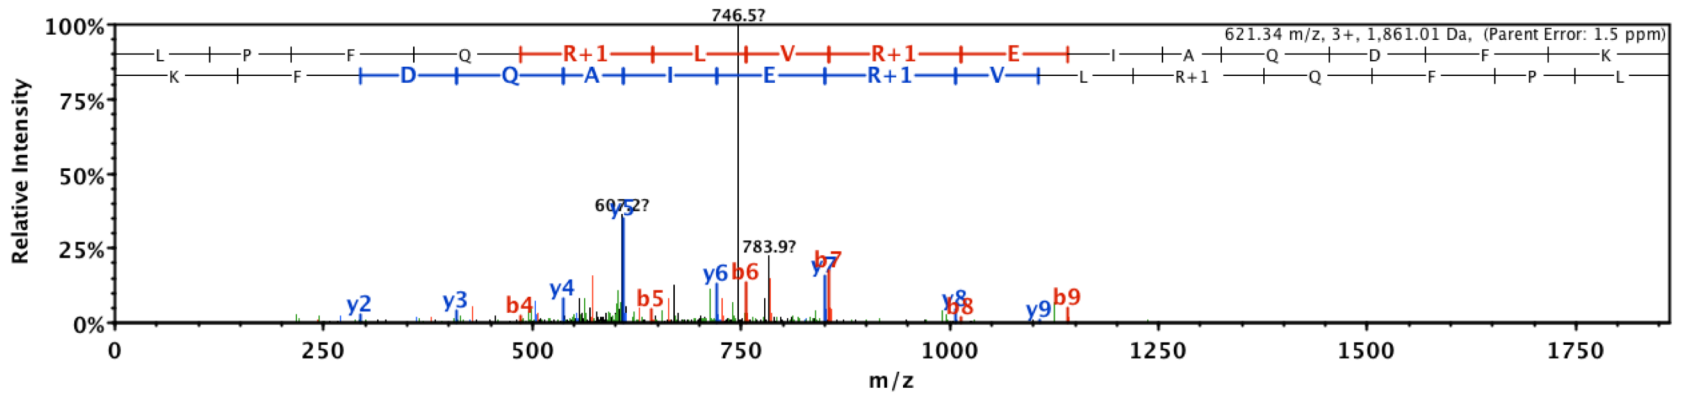

| B  | B Ions  | B+2H  | B-NH3   | B-H2O   | AA  | Y Ions  | Y+2H  | Y-NH3   | Y-H2O   | Y  |
|----|---------|-------|---------|---------|-----|---------|-------|---------|---------|----|
| 1  | 114.1   | 57.5  |         |         | L   | 1,862.0 | 931.5 | 1,845.0 | 1,844.0 | 15 |
| 2  | 211.1   | 106.1 |         |         | P   | 1,748.9 | 875.0 | 1,731.9 | 1,730.9 | 14 |
| 3  | 358.2   | 179.6 |         |         | F   | 1,651.9 | 826.4 | 1,634.9 | 1,633.9 | 13 |
| 4  | 486.3   | 243.6 | 469.2   |         | Q   | 1,504.8 | 752.9 | 1,487.8 | 1,486.8 | 12 |
| 5  | 643.4   | 322.2 | 626.3   |         | R+1 | 1,376.8 | 688.9 | 1,359.7 | 1,358.7 | 11 |
| 6  | 756.4   | 378.7 | 739.4   |         | L   | 1,219.7 | 610.3 | 1,202.6 | 1,201.7 | 10 |
| 7  | 855.5   | 428.3 | 838.5   |         | V   | 1,106.6 | 553.8 | 1,089.6 | 1,088.6 | 9  |
| 8  | 1,012.6 | 506.8 | 995.6   |         | R+1 | 1,007.5 | 504.3 | 990.5   | 989.5   | 8  |
| 9  | 1,141.6 | 571.3 | 1,124.6 | 1,123.6 | E   | 850.4   | 425.7 | 833.4   | 832.4   | 7  |
| 10 | 1,254.7 | 627.9 | 1,237.7 | 1,236.7 | I   | 721.4   | 361.2 | 704.4   | 703.4   | 6  |
| 11 | 1,325.8 | 663.4 | 1,308.7 | 1,307.7 | A   | 608.3   | 304.7 | 591.3   | 590.3   | 5  |
| 12 | 1,453.8 | 727.4 | 1,436.8 | 1,435.8 | Q   | 537.3   | 269.1 | 520.2   | 519.3   | 4  |
| 13 | 1,568.8 | 784.9 | 1,551.8 | 1,550.8 | D   | 409.2   | 205.1 | 392.2   | 391.2   | 3  |
| 14 | 1,715.9 | 858.5 | 1,698.9 | 1,697.9 | F   | 294.2   | 147.6 | 277.2   |         | 2  |
| 15 | 1,862.0 | 931.5 | 1,845.0 | 1,844.0 | K   | 147.1   | 74.1  | 130.1   |         | 1  |

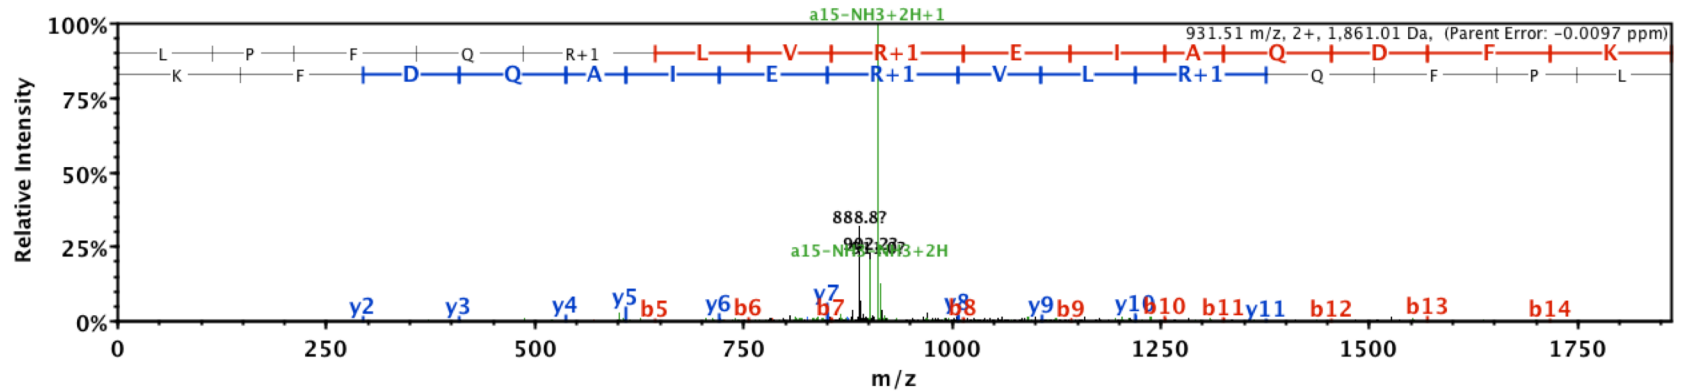

| B  | B Ions  | B+2H  | B-NH3   | B-H2O   | AA  | Y Ions  | Y+2H  | Y-NH3   | Y-H2O   | Y  |
|----|---------|-------|---------|---------|-----|---------|-------|---------|---------|----|
| 1  | 114.1   |       |         |         | L   | 1,862.0 | 931.5 | 1,845.0 | 1,844.0 | 15 |
| 2  | 211.1   |       |         |         | P   | 1,748.9 | 875.0 | 1,731.9 | 1,730.9 | 14 |
| 3  | 358.2   |       |         |         | F   | 1,651.9 | 826.4 | 1,634.9 | 1,633.9 | 13 |
| 4  | 486.3   |       | 469.2   |         | Q   | 1,504.8 | 752.9 | 1,487.8 | 1,486.8 | 12 |
| 5  | 643.4   | 322.2 | 626.3   |         | R+1 | 1,376.8 | 688.9 | 1,359.7 | 1,358.7 | 11 |
| 6  | 756.4   | 378.7 | 739.4   |         | L   | 1,219.7 | 610.3 | 1,202.6 | 1,201.7 | 10 |
| 7  | 855.5   | 428.3 | 838.5   |         | V   | 1,106.6 | 553.8 | 1,089.6 | 1,088.6 | 9  |
| 8  | 1,012.6 | 506.8 | 995.6   |         | R+1 | 1,007.5 | 504.3 | 990.5   | 989.5   | 8  |
| 9  | 1,141.6 | 571.3 | 1,124.6 | 1,123.6 | E   | 850.4   | 425.7 | 833.4   | 832.4   | 7  |
| 10 | 1,254.7 | 627.9 | 1,237.7 | 1,236.7 | I   | 721.4   | 361.2 | 704.4   | 703.4   | 6  |
| 11 | 1,325.8 | 663.4 | 1,308.7 | 1,307.7 | A   | 608.3   |       | 591.3   | 590.3   | 5  |
| 12 | 1,453.8 | 727.4 | 1,436.8 | 1,435.8 | Q   | 537.3   |       | 520.2   | 519.3   | 4  |
| 13 | 1,568.8 | 784.9 | 1,551.8 | 1,550.8 | D   | 409.2   |       | 392.2   | 391.2   | 3  |
| 14 | 1,715.9 | 858.5 | 1,698.9 | 1,697.9 | F   | 294.2   |       | 277.2   |         | 2  |
| 15 | 1,862.0 | 931.5 | 1,845.0 | 1,844.0 | K   | 147.1   |       | 130.1   |         | 1  |

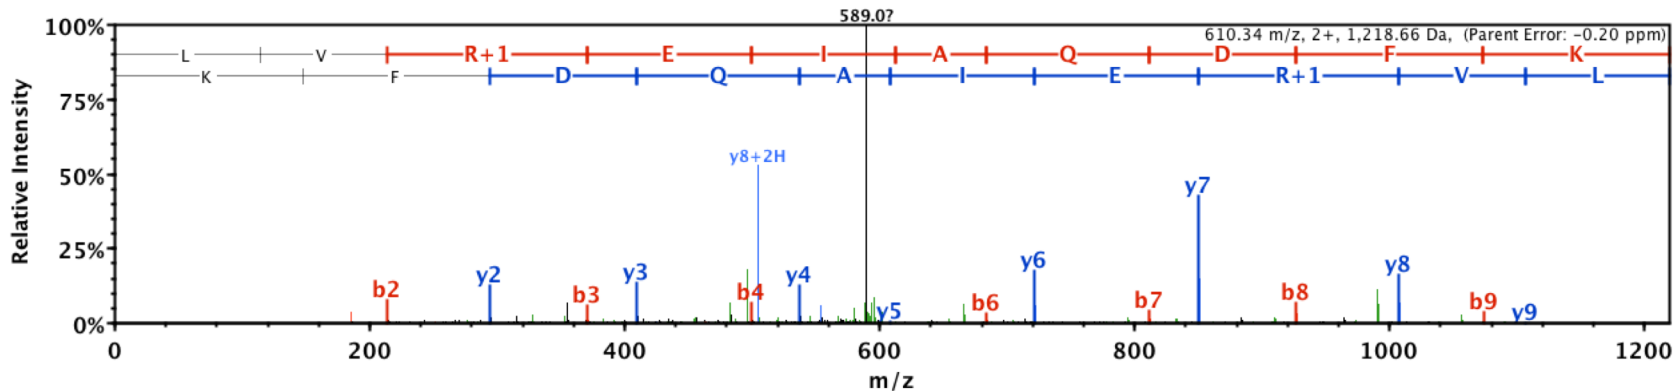

| B  | B Ions  | B+2H  | B-NH3   | B-H2O   | AA  | Y Ions  | Y+2H  | Y-NH3   | Y-H2O   | Y  |
|----|---------|-------|---------|---------|-----|---------|-------|---------|---------|----|
| 1  | 114.1   |       |         |         | L   | 1,219.7 | 610.3 | 1,202.6 | 1,201.7 | 10 |
| 2  | 213.2   |       |         |         | V   | 1,106.6 | 553.8 | 1,089.6 | 1,088.6 | 9  |
| 3  | 370.2   | 185.6 | 353.2   |         | R+1 | 1,007.5 | 504.3 | 990.5   | 989.5   | 8  |
| 4  | 499.3   | 250.1 | 482.3   | 481.3   | E   | 850.4   | 425.7 | 833.4   | 832.4   | 7  |
| 5  | 612.4   | 306.7 | 595.3   | 594.4   | I   | 721.4   | 361.2 | 704.4   | 703.4   | 6  |
| 6  | 683.4   | 342.2 | 666.4   | 665.4   | A   | 608.3   |       | 591.3   | 590.3   | 5  |
| 7  | 811.5   | 406.2 | 794.4   | 793.5   | Q   | 537.3   |       | 520.2   | 519.3   | 4  |
| 8  | 926.5   | 463.8 | 909.5   | 908.5   | D   | 409.2   |       | 392.2   | 391.2   | 3  |
| 9  | 1,073.6 | 537.3 | 1,056.5 | 1,055.6 | F   | 294.2   |       | 277.2   |         | 2  |
| 10 | 1,219.7 | 610.3 | 1,202.6 | 1,201.7 | K   | 147.1   |       | 130.1   |         | 1  |

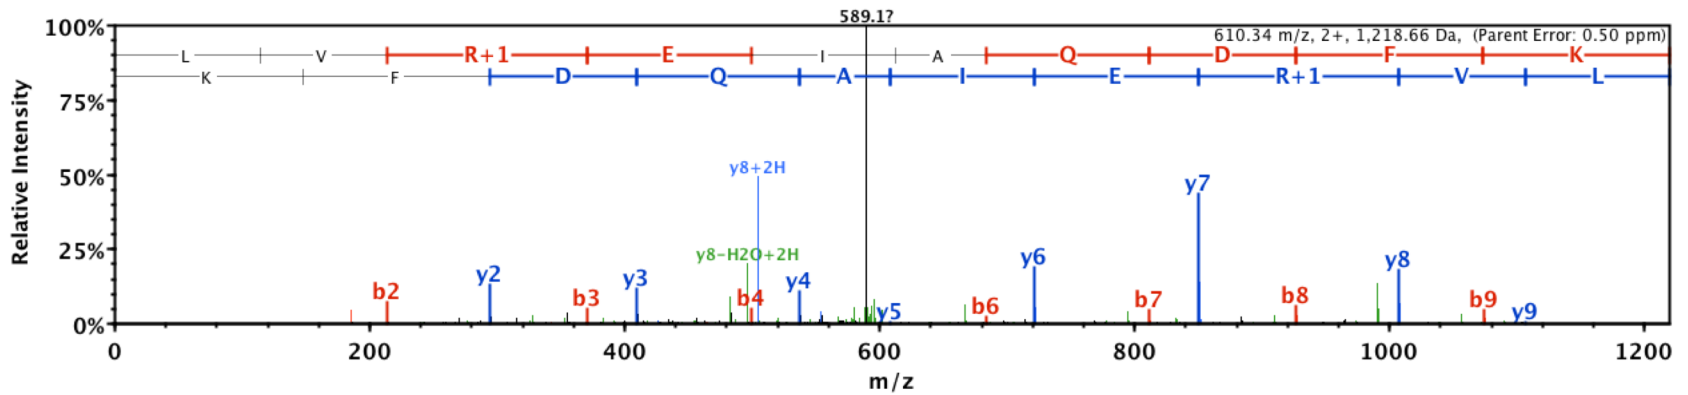

| B  | B Ions  | B+2H  | B-NH3   | B-H2O   | AA  | Y Ions  | Y+2H  | Y-NH3   | Y-H2O   | Y  |
|----|---------|-------|---------|---------|-----|---------|-------|---------|---------|----|
| 1  | 114.1   |       |         |         | L   | 1,219.7 | 610.3 | 1,202.6 | 1,201.7 | 10 |
| 2  | 213.2   |       |         |         | V   | 1,106.6 | 553.8 | 1,089.6 | 1,088.6 | 9  |
| 3  | 370.2   | 185.6 | 353.2   |         | R+1 | 1,007.5 | 504.3 | 990.5   | 989.5   | 8  |
| 4  | 499.3   | 250.1 | 482.3   | 481.3   | E   | 850.4   | 425.7 | 833.4   | 832.4   | 7  |
| 5  | 612.4   | 306.7 | 595.3   | 594.4   | I   | 721.4   | 361.2 | 704.4   | 703.4   | 6  |
| 6  | 683.4   | 342.2 | 666.4   | 665.4   | A   | 608.3   |       | 591.3   | 590.3   | 5  |
| 7  | 811.5   | 406.2 | 794.4   | 793.5   | Q   | 537.3   |       | 520.2   | 519.3   | 4  |
| 8  | 926.5   | 463.8 | 909.5   | 908.5   | D   | 409.2   |       | 392.2   | 391.2   | 3  |
| 9  | 1,073.6 | 537.3 | 1,056.5 | 1,055.6 | F   | 294.2   |       | 277.2   |         | 2  |
| 10 | 1,219.7 | 610.3 | 1,202.6 | 1,201.7 | K   | 147.1   |       | 130.1   |         | 1  |

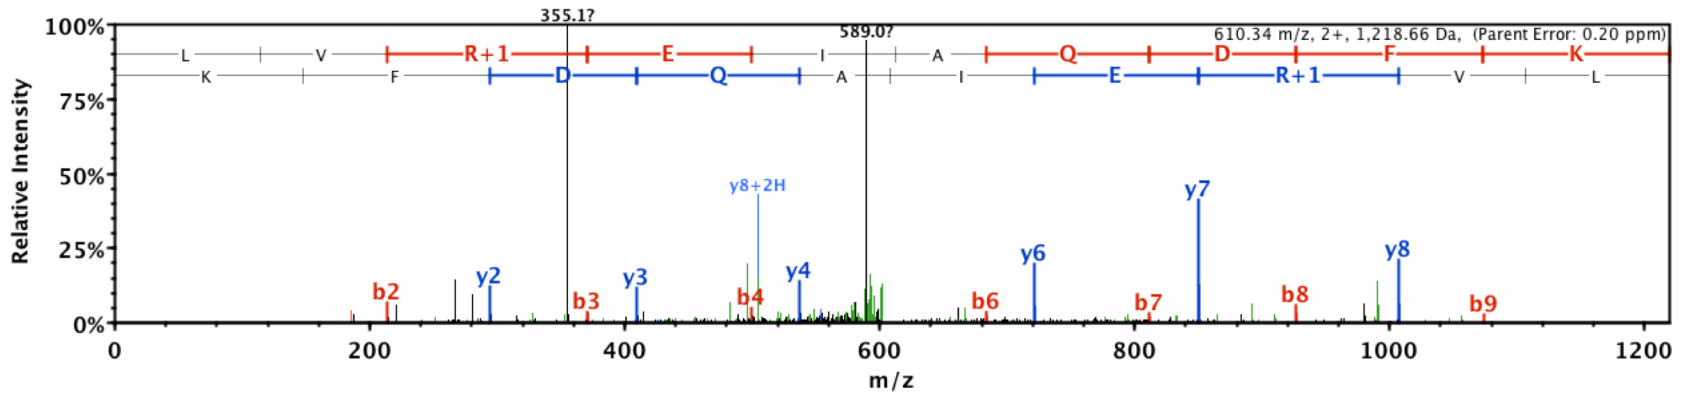

| B  | B Ions  | B+2H  | B-NH3   | B-H2O   | AA  | Y Ions  | Y+2H  | Y-NH3   | Y-H2O   | Y  |
|----|---------|-------|---------|---------|-----|---------|-------|---------|---------|----|
| 1  | 114.1   |       |         |         | L   | 1,219.7 | 610.3 | 1,202.6 | 1,201.7 | 10 |
| 2  | 213.2   |       |         |         | V   | 1,106.6 | 553.8 | 1,089.6 | 1,088.6 | 9  |
| 3  | 370.2   | 185.6 | 353.2   |         | R+1 | 1,007.5 | 504.3 | 990.5   | 989.5   | 8  |
| 4  | 499.3   | 250.1 | 482.3   | 481.3   | E   | 850.4   | 425.7 | 833.4   | 832.4   | 7  |
| 5  | 612.4   | 306.7 | 595.3   | 594.4   | I   | 721.4   | 361.2 | 704.4   | 703.4   | 6  |
| 6  | 683.4   | 342.2 | 666.4   | 665.4   | A   | 608.3   |       | 591.3   | 590.3   | 5  |
| 7  | 811.5   | 406.2 | 794.4   | 793.5   | Q   | 537.3   |       | 520.2   | 519.3   | 4  |
| 8  | 926.5   | 463.8 | 909.5   | 908.5   | D   | 409.2   |       | 392.2   | 391.2   | 3  |
| 9  | 1,073.6 | 537.3 | 1,056.5 | 1,055.6 | F   | 294.2   |       | 277.2   |         | 2  |
| 10 | 1,219.7 | 610.3 | 1,202.6 | 1,201.7 | K   | 147.1   |       | 130.1   |         | 1  |



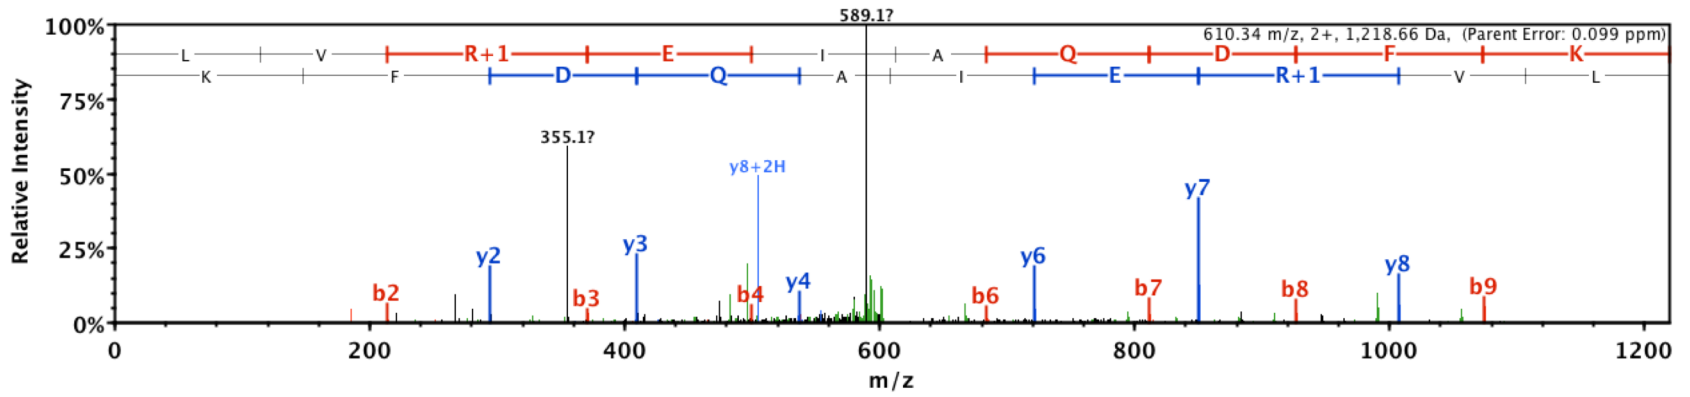

| B  | B Ions  | B+2H  | B-NH3   | B-H2O   | AA  | Y Ions  | Y+2H  | Y-NH3   | Y-H2O   | Y  |
|----|---------|-------|---------|---------|-----|---------|-------|---------|---------|----|
| 1  | 114.1   |       |         |         | L   | 1,219.7 | 610.3 | 1,202.6 | 1,201.7 | 10 |
| 2  | 213.2   |       |         |         | V   | 1,106.6 | 553.8 | 1,089.6 | 1,088.6 | 9  |
| 3  | 370.2   | 185.6 | 353.2   |         | R+1 | 1,007.5 | 504.3 | 990.5   | 989.5   | 8  |
| 4  | 499.3   | 250.1 | 482.3   | 481.3   | E   | 850.4   | 425.7 | 833.4   | 832.4   | 7  |
| 5  | 612.4   | 306.7 | 595.3   | 594.4   | I   | 721.4   | 361.2 | 704.4   | 703.4   | 6  |
| 6  | 683.4   | 342.2 | 666.4   | 665.4   | A   | 608.3   |       | 591.3   | 590.3   | 5  |
| 7  | 811.5   | 406.2 | 794.4   | 793.5   | Q   | 537.3   |       | 520.2   | 519.3   | 4  |
| 8  | 926.5   | 463.8 | 909.5   | 908.5   | D   | 409.2   |       | 392.2   | 391.2   | 3  |
| 9  | 1,073.6 | 537.3 | 1,056.5 | 1,055.6 | F   | 294.2   |       | 277.2   |         | 2  |
| 10 | 1,219.7 | 610.3 | 1,202.6 | 1,201.7 | K   | 147.1   |       | 130.1   |         | 1  |

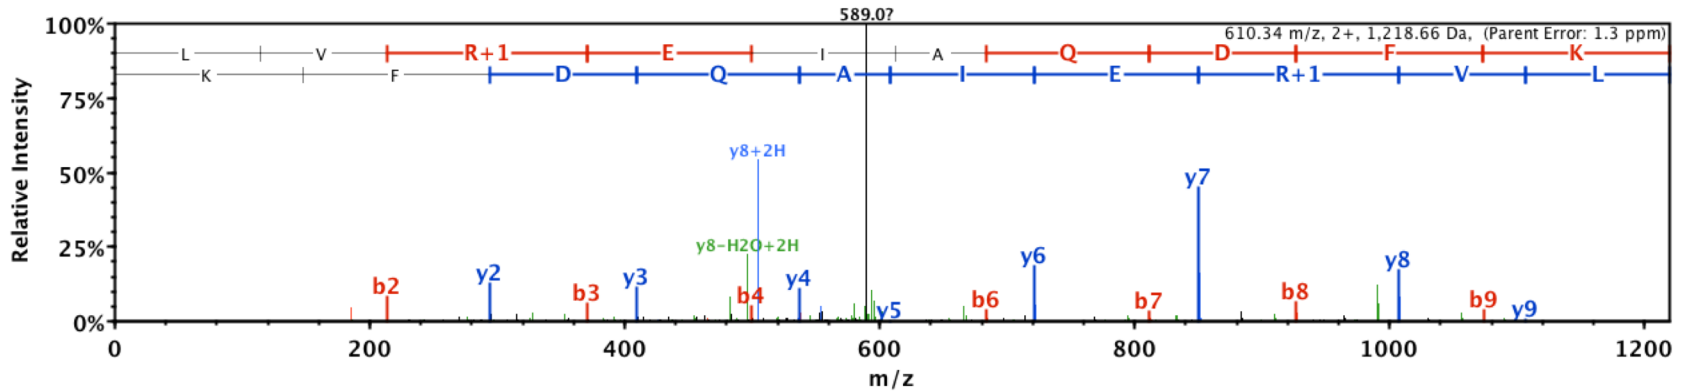

| B  | B Ions  | B+2H  | B-NH3   | B-H2O   | AA  | Y Ions  | Y+2H  | Y-NH3   | Y-H2O   | Y  |
|----|---------|-------|---------|---------|-----|---------|-------|---------|---------|----|
| 1  | 114.1   |       |         |         | L   | 1,219.7 | 610.3 | 1,202.6 | 1,201.7 | 10 |
| 2  | 213.2   |       |         |         | V   | 1,106.6 | 553.8 | 1,089.6 | 1,088.6 | 9  |
| 3  | 370.2   | 185.6 | 353.2   |         | R+1 | 1,007.5 | 504.3 | 990.5   | 989.5   | 8  |
| 4  | 499.3   | 250.1 | 482.3   | 481.3   | E   | 850.4   | 425.7 | 833.4   | 832.4   | 7  |
| 5  | 612.4   | 306.7 | 595.3   | 594.4   | I   | 721.4   | 361.2 | 704.4   | 703.4   | 6  |
| 6  | 683.4   | 342.2 | 666.4   | 665.4   | A   | 608.3   |       | 591.3   | 590.3   | 5  |
| 7  | 811.5   | 406.2 | 794.4   | 793.5   | Q   | 537.3   |       | 520.2   | 519.3   | 4  |
| 8  | 926.5   | 463.8 | 909.5   | 908.5   | D   | 409.2   |       | 392.2   | 391.2   | 3  |
| 9  | 1,073.6 | 537.3 | 1,056.5 | 1,055.6 | F   | 294.2   |       | 277.2   |         | 2  |
| 10 | 1,219.7 | 610.3 | 1,202.6 | 1,201.7 | K   | 147.1   |       | 130.1   |         | 1  |

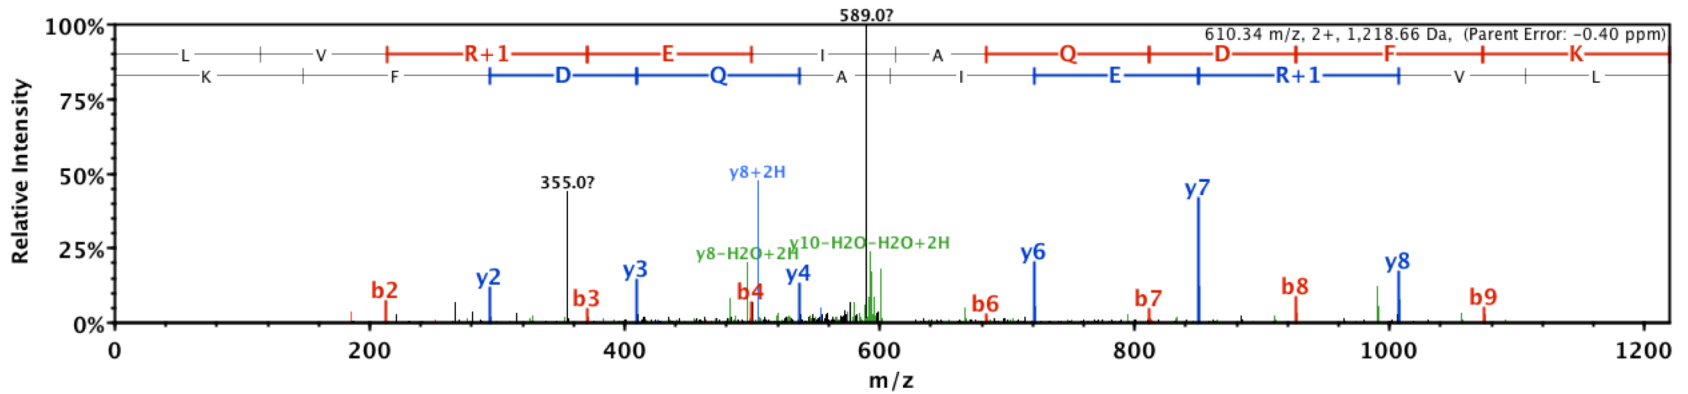

| B  | B Ions  | B+2H  | B-NH3   | B-H2O   | AA  | Y Ions  | Y+2H  | Y-NH3   | Y-H2O   | Y  |
|----|---------|-------|---------|---------|-----|---------|-------|---------|---------|----|
| 1  | 114.1   |       |         |         | L   | 1,219.7 | 610.3 | 1,202.6 | 1,201.7 | 10 |
| 2  | 213.2   |       |         |         | V   | 1,106.6 | 553.8 | 1,089.6 | 1,088.6 | 9  |
| 3  | 370.2   | 185.6 | 353.2   |         | R+1 | 1,007.5 | 504.3 | 990.5   | 989.5   | 8  |
| 4  | 499.3   | 250.1 | 482.3   | 481.3   | E   | 850.4   | 425.7 | 833.4   | 832.4   | 7  |
| 5  | 612.4   | 306.7 | 595.3   | 594.4   | I   | 721.4   | 361.2 | 704.4   | 703.4   | 6  |
| 6  | 683.4   | 342.2 | 666.4   | 665.4   | A   | 608.3   |       | 591.3   | 590.3   | 5  |
| 7  | 811.5   | 406.2 | 794.4   | 793.5   | Q   | 537.3   |       | 520.2   | 519.3   | 4  |
| 8  | 926.5   | 463.8 | 909.5   | 908.5   | D   | 409.2   |       | 392.2   | 391.2   | 3  |
| 9  | 1,073.6 | 537.3 | 1,056.5 | 1,055.6 | F   | 294.2   |       | 277.2   |         | 2  |
| 10 | 1,219.7 | 610.3 | 1,202.6 | 1,201.7 | K   | 147.1   |       | 130.1   |         | 1  |

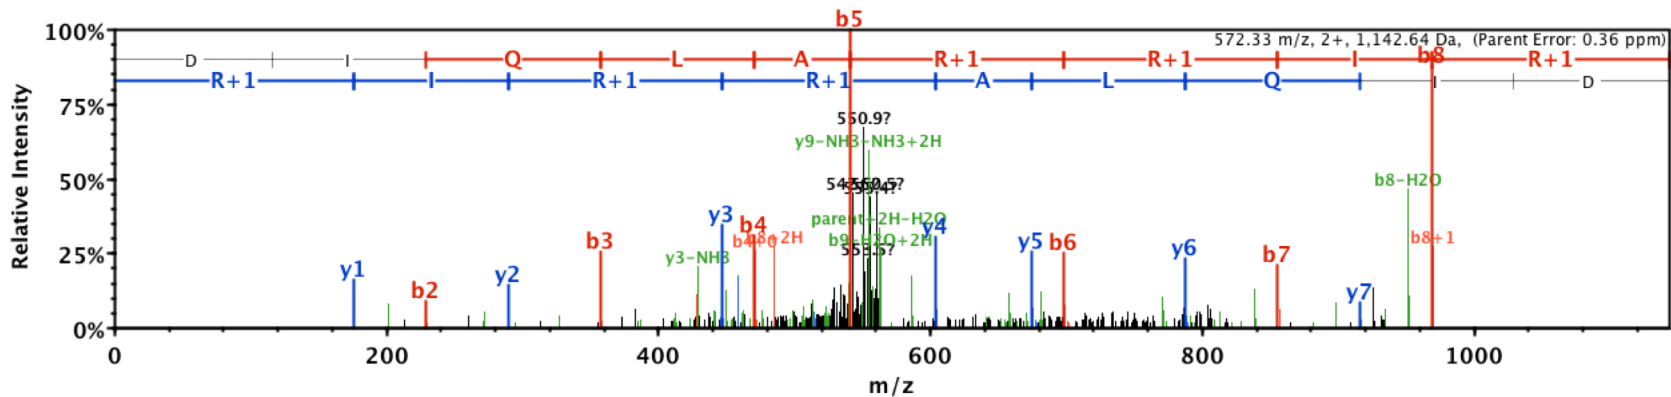

| B | B Ions  | B+2H  | B-NH3   | B-H2O   | AA  | Y Ions  | Y+2H  | Y-NH3   | Y-H2O   | Y |
|---|---------|-------|---------|---------|-----|---------|-------|---------|---------|---|
| 1 | 116.0   |       |         | 98.0    | D   | 1,143.6 | 572.3 | 1,126.6 | 1,125.6 | 9 |
| 2 | 229.1   |       |         | 211.1   | I   | 1,028.6 | 514.8 | 1,011.6 |         | 8 |
| 3 | 357.2   |       | 340.2   | 339.2   | Q   | 915.5   | 458.3 | 898.5   |         | 7 |
| 4 | 470.3   |       | 453.2   | 452.3   | L   | 787.5   | 394.2 | 770.5   |         | 6 |
| 5 | 541.3   |       | 524.3   | 523.3   | A   | 674.4   | 337.7 | 657.4   |         | 5 |
| 6 | 698.4   | 349.7 | 681.4   | 680.4   | R+1 | 603.4   | 302.2 | 586.3   |         | 4 |
| 7 | 855.5   | 428.2 | 838.4   | 837.5   | R+1 | 446.3   | 223.6 | 429.2   |         | 3 |
| 8 | 968.6   | 484.8 | 951.5   | 950.5   | I   | 289.2   |       | 272.2   |         | 2 |
| 9 | 1,143.6 | 572.3 | 1,126.6 | 1,125.6 | R+1 | 176.1   |       | 159.1   |         | 1 |

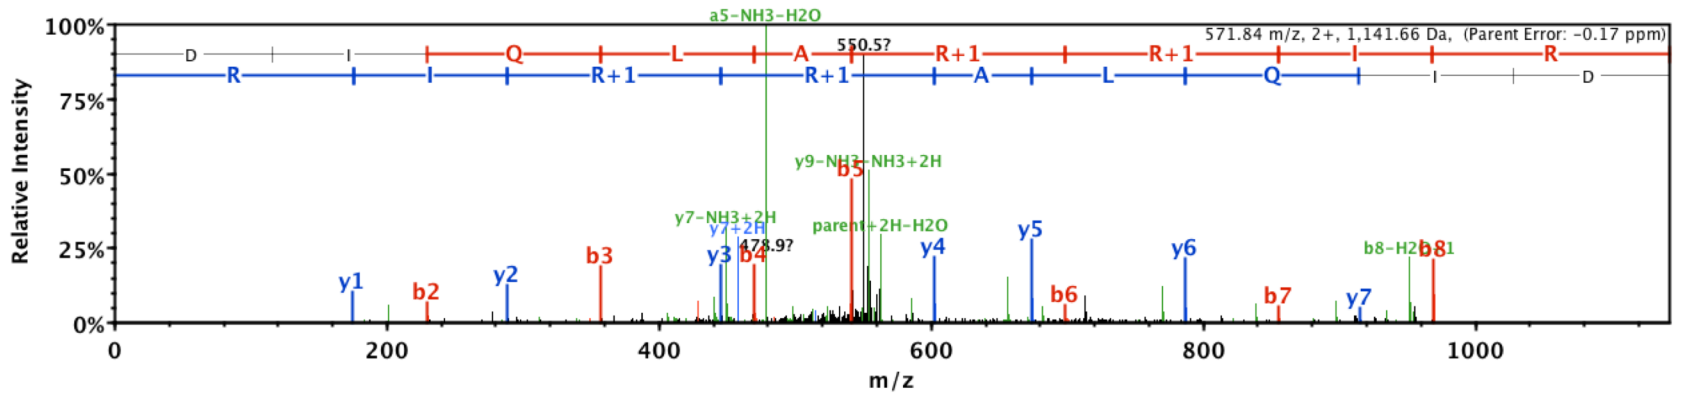

| B | B Ions  | B+2H  | B-NH3   | B-H2O   | AA  | Y Ions  | Y+2H  | Y-NH3   | Y-H2O   | Y |
|---|---------|-------|---------|---------|-----|---------|-------|---------|---------|---|
| 1 | 116.0   |       |         | 98.0    | D   | 1,142.7 | 571.8 | 1,125.6 | 1,124.7 | 9 |
| 2 | 229.1   |       |         | 211.1   | I   | 1,027.6 | 514.3 | 1,010.6 |         | 8 |
| 3 | 357.2   |       | 340.2   | 339.2   | Q   | 914.6   | 457.8 | 897.5   |         | 7 |
| 4 | 470.3   |       | 453.2   | 452.3   | L   | 786.5   | 393.8 | 769.5   |         | 6 |
| 5 | 541.3   |       | 524.3   | 523.3   | A   | 673.4   | 337.2 | 656.4   |         | 5 |
| 6 | 698.4   | 349.7 | 681.4   | 680.4   | R+1 | 602.4   | 301.7 | 585.3   |         | 4 |
| 7 | 855.5   | 428.2 | 838.4   | 837.5   | R+1 | 445.3   | 223.1 | 428.3   |         | 3 |
| 8 | 968.6   | 484.8 | 951.5   | 950.5   | I   | 288.2   |       | 271.2   |         | 2 |
| 9 | 1,142.7 | 571.8 | 1,125.6 | 1,124.7 | R   | 175.1   |       | 158.1   |         | 1 |

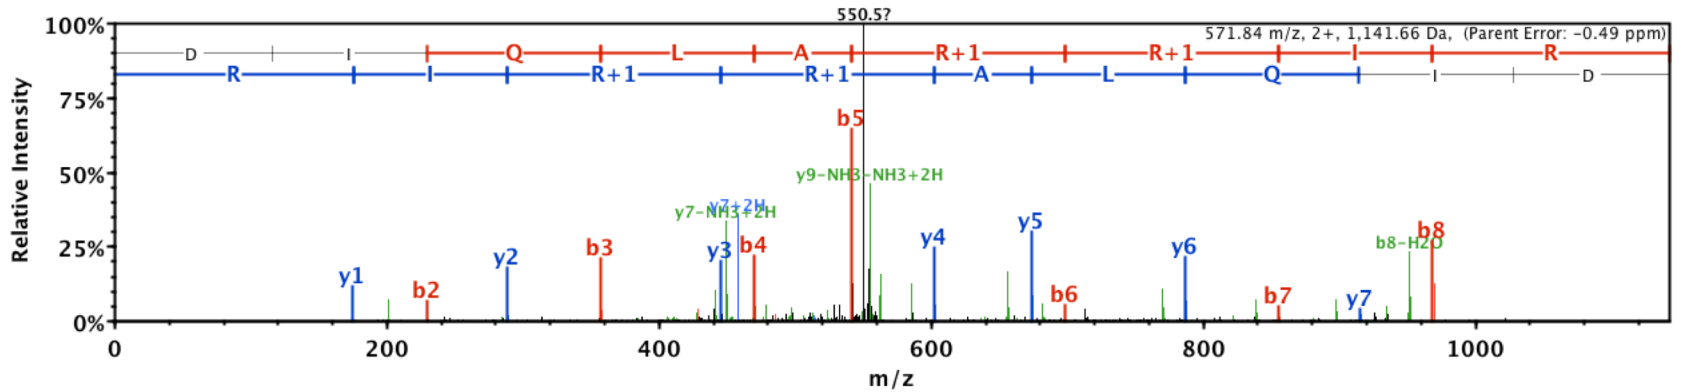

| B | B Ions  | B+2H  | B-NH3   | B-H2O   | AA  | Y Ions  | Y+2H  | Y-NH3   | Y-H2O   | Y |
|---|---------|-------|---------|---------|-----|---------|-------|---------|---------|---|
| 1 | 116.0   |       |         | 98.0    | D   | 1,142.7 | 571.8 | 1,125.6 | 1,124.7 | 9 |
| 2 | 229.1   |       |         | 211.1   | I   | 1,027.6 | 514.3 | 1,010.6 |         | 8 |
| 3 | 357.2   |       | 340.2   | 339.2   | Q   | 914.6   | 457.8 | 897.5   |         | 7 |
| 4 | 470.3   |       | 453.2   | 452.3   | L   | 786.5   | 393.8 | 769.5   |         | 6 |
| 5 | 541.3   |       | 524.3   | 523.3   | A   | 673.4   | 337.2 | 656.4   |         | 5 |
| 6 | 698.4   | 349.7 | 681.4   | 680.4   | R+1 | 602.4   | 301.7 | 585.3   |         | 4 |
| 7 | 855.5   | 428.2 | 838.4   | 837.5   | R+1 | 445.3   | 223.1 | 428.3   |         | 3 |
| 8 | 968.6   | 484.8 | 951.5   | 950.5   | I   | 288.2   |       | 271.2   |         | 2 |
| 9 | 1,142.7 | 571.8 | 1,125.6 | 1,124.7 | R   | 175.1   |       | 158.1   |         | 1 |

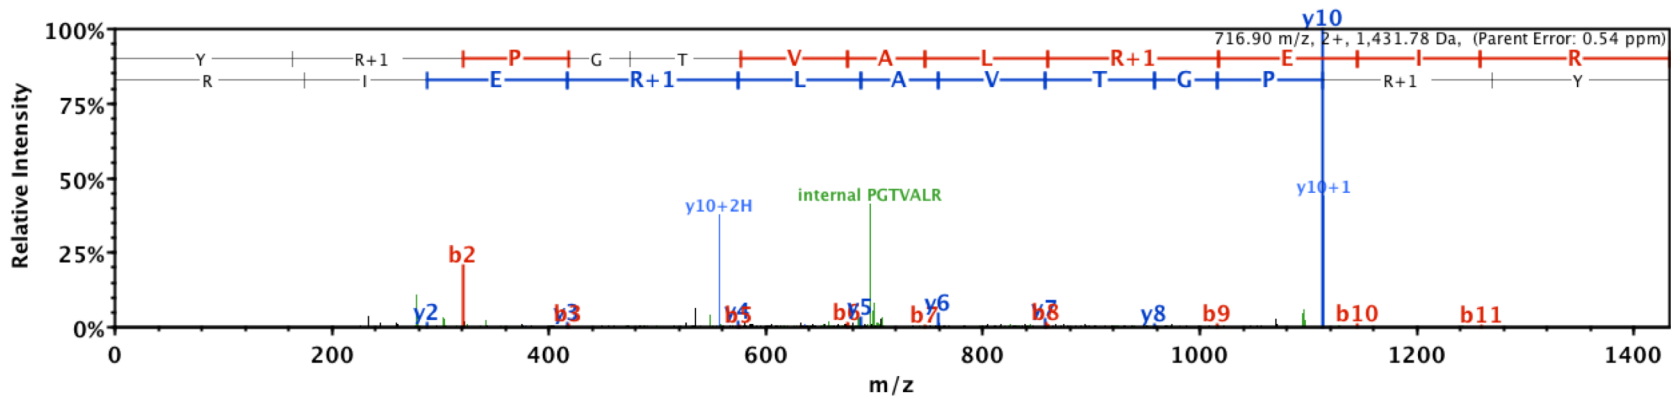

| B  | B Ions  | B+2H  | B-NH3   | B-H2O   | AA  | Y Ions  | Y+2H  | Y-NH3   | Y-H2O   | Y  |
|----|---------|-------|---------|---------|-----|---------|-------|---------|---------|----|
| 1  | 164.1   |       |         | 146.1   | Y   | 1,432.8 | 716.9 | 1,415.8 | 1,414.8 | 12 |
| 2  | 321.2   | 161.1 | 304.1   | 303.1   | R+1 | 1,269.7 | 635.4 | 1,252.7 | 1,251.7 | 11 |
| 3  | 418.2   | 209.6 | 401.2   | 400.2   | P   | 1,112.6 | 556.8 | 1,095.6 | 1,094.6 | 10 |
| 4  | 475.2   | 238.1 | 458.2   | 457.2   | G   | 1,015.6 | 508.3 | 998.6   | 997.6   | 9  |
| 5  | 576.3   | 288.6 | 559.3   | 558.3   | T   | 958.6   | 479.8 | 941.5   | 940.6   | 8  |
| 6  | 675.3   | 338.2 | 658.3   | 657.3   | V   | 857.5   | 429.3 | 840.5   | 839.5   | 7  |
| 7  | 746.4   | 373.7 | 729.4   | 728.4   | A   | 758.5   | 379.7 | 741.4   | 740.4   | 6  |
| 8  | 859.5   | 430.2 | 842.4   | 841.5   | L   | 687.4   | 344.2 | 670.4   | 669.4   | 5  |
| 9  | 1,016.6 | 508.8 | 999.5   | 998.5   | R+1 | 574.3   | 287.7 | 557.3   | 556.3   | 4  |
| 10 | 1,145.6 | 573.3 | 1,128.6 | 1,127.6 | E   | 417.2   |       | 400.2   | 399.2   | 3  |
| 11 | 1,258.7 | 629.8 | 1,241.7 | 1,240.7 | I   | 288.2   |       | 271.2   | 270.2   | 2  |
| 12 | 1,432.8 | 716.9 | 1,415.8 | 1,414.8 | R   | 175.1   |       | 158.1   | 157.1   | 1  |

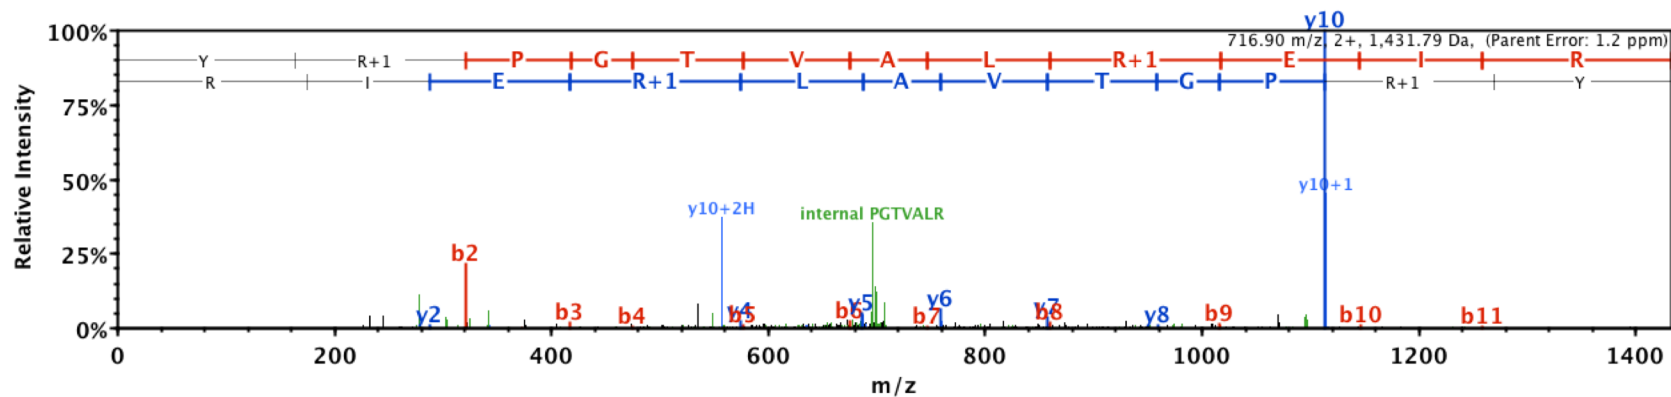

| B  | B Ions  | B+2H  | B-NH3   | B-H2O   | AA  | Y Ions  | Y+2H  | Y-NH3   | Y-H2O   | Y  |
|----|---------|-------|---------|---------|-----|---------|-------|---------|---------|----|
| 1  | 164.1   |       |         | 146.1   | Y   | 1,432.8 | 716.9 | 1,415.8 | 1,414.8 | 12 |
| 2  | 321.2   | 161.1 | 304.1   | 303.1   | R+1 | 1,269.7 | 635.4 | 1,252.7 | 1,251.7 | 11 |
| 3  | 418.2   | 209.6 | 401.2   | 400.2   | P   | 1,112.6 | 556.8 | 1,095.6 | 1,094.6 | 10 |
| 4  | 475.2   | 238.1 | 458.2   | 457.2   | G   | 1,015.6 | 508.3 | 998.6   | 997.6   | 9  |
| 5  | 576.3   | 288.6 | 559.3   | 558.3   | T   | 958.6   | 479.8 | 941.5   | 940.6   | 8  |
| 6  | 675.3   | 338.2 | 658.3   | 657.3   | V   | 857.5   | 429.3 | 840.5   | 839.5   | 7  |
| 7  | 746.4   | 373.7 | 729.4   | 728.4   | A   | 758.5   | 379.7 | 741.4   | 740.4   | 6  |
| 8  | 859.5   | 430.2 | 842.4   | 841.5   | L   | 687.4   | 344.2 | 670.4   | 669.4   | 5  |
| 9  | 1,016.6 | 508.8 | 999.5   | 998.5   | R+1 | 574.3   | 287.7 | 557.3   | 556.3   | 4  |
| 10 | 1,145.6 | 573.3 | 1,128.6 | 1,127.6 | E   | 417.2   |       | 400.2   | 399.2   | 3  |
| 11 | 1,258.7 | 629.8 | 1,241.7 | 1,240.7 | I   | 288.2   |       | 271.2   | 270.2   | 2  |
| 12 | 1,432.8 | 716.9 | 1,415.8 | 1,414.8 | R   | 175.1   |       | 158.1   | 157.1   | 1  |



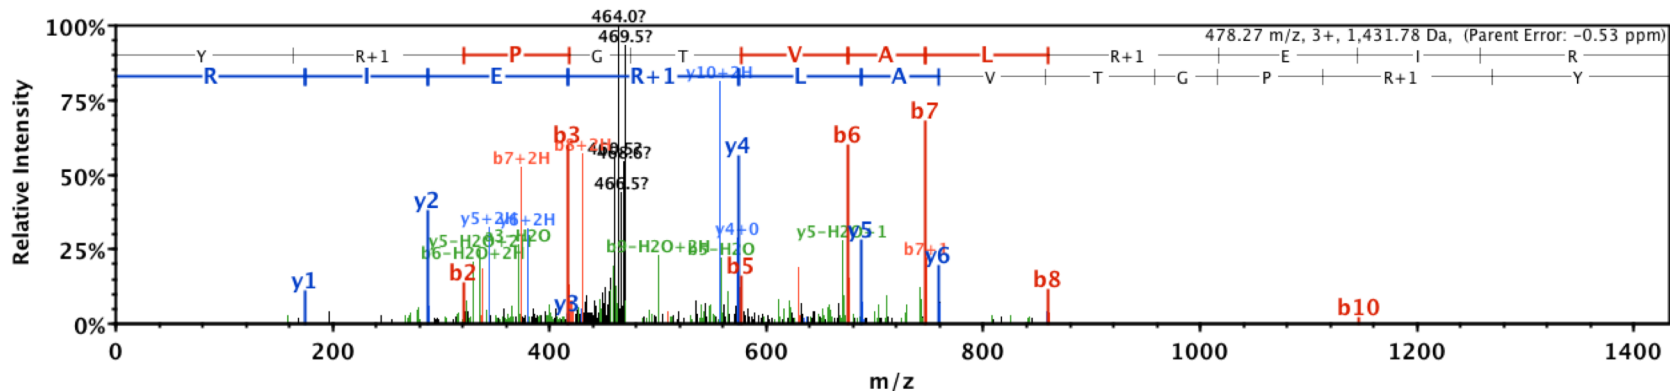

| B  | B Ions  | B+2H  | B-NH3   | B-H2O   | AA  | Y Ions  | Y+2H  | Y-NH3   | Y-H2O   | Y  |
|----|---------|-------|---------|---------|-----|---------|-------|---------|---------|----|
| 1  | 164.1   | 82.5  |         | 146.1   | Y   | 1,432.8 | 716.9 | 1,415.8 | 1,414.8 | 12 |
| 2  | 321.2   | 161.1 | 304.1   | 303.1   | R+1 | 1,269.7 | 635.4 | 1,252.7 | 1,251.7 | 11 |
| 3  | 418.2   | 209.6 | 401.2   | 400.2   | P   | 1,112.6 | 556.8 | 1,095.6 | 1,094.6 | 10 |
| 4  | 475.2   | 238.1 | 458.2   | 457.2   | G   | 1,015.6 | 508.3 | 998.6   | 997.6   | 9  |
| 5  | 576.3   | 288.6 | 559.3   | 558.3   | T   | 958.6   | 479.8 | 941.5   | 940.6   | 8  |
| 6  | 675.3   | 338.2 | 658.3   | 657.3   | V   | 857.5   | 429.3 | 840.5   | 839.5   | 7  |
| 7  | 746.4   | 373.7 | 729.4   | 728.4   | A   | 758.5   | 379.7 | 741.4   | 740.4   | 6  |
| 8  | 859.5   | 430.2 | 842.4   | 841.5   | L   | 687.4   | 344.2 | 670.4   | 669.4   | 5  |
| 9  | 1,016.6 | 508.8 | 999.5   | 998.5   | R+1 | 574.3   | 287.7 | 557.3   | 556.3   | 4  |
| 10 | 1,145.6 | 573.3 | 1,128.6 | 1,127.6 | E   | 417.2   | 209.1 | 400.2   | 399.2   | 3  |
| 11 | 1,258.7 | 629.8 | 1,241.7 | 1,240.7 | I   | 288.2   | 144.6 | 271.2   | 270.2   | 2  |
| 12 | 1,432.8 | 716.9 | 1,415.8 | 1,414.8 | R   | 175.1   | 88.1  | 158.1   | 157.1   | 1  |

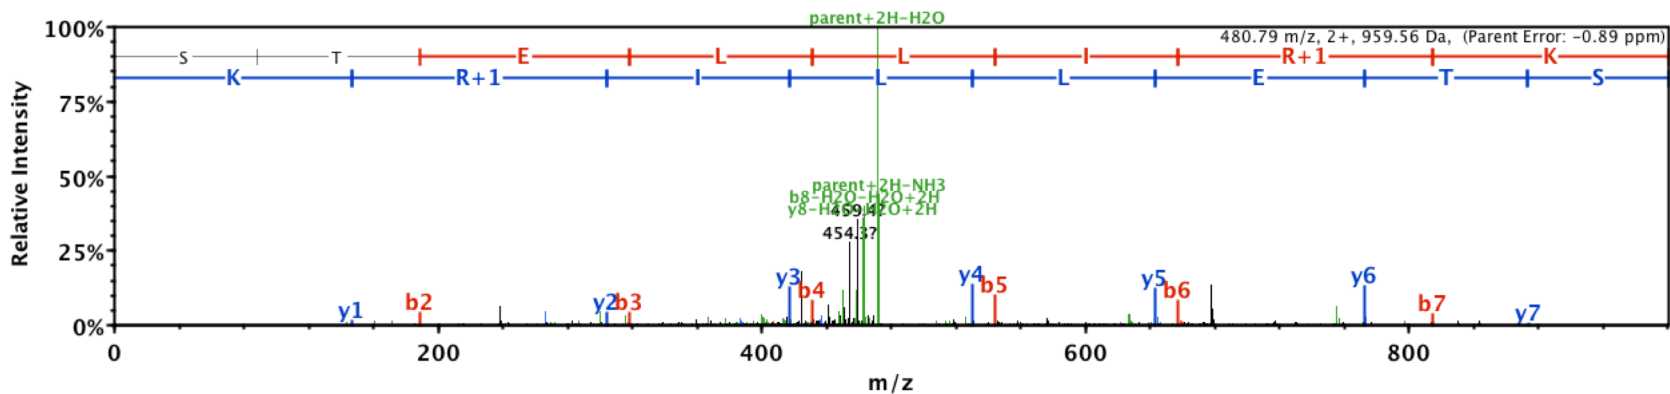

| B | B Ions | B+2H  | B-NH <sub>3</sub> | B-H <sub>2</sub> O | AA  | Y Ions | Y+2H  | Y-NH <sub>3</sub> | Y-H <sub>2</sub> O | Y |
|---|--------|-------|-------------------|--------------------|-----|--------|-------|-------------------|--------------------|---|
| 1 | 88.0   |       |                   | 70.0               | S   | 960.6  | 480.8 | 943.5             | 942.6              | 8 |
| 2 | 189.1  |       |                   | 171.1              | T   | 873.5  | 437.3 | 856.5             | 855.5              | 7 |
| 3 | 318.1  |       |                   | 300.1              | E   | 772.5  | 386.8 | 755.5             | 754.5              | 6 |
| 4 | 431.2  |       |                   | 413.2              | L   | 643.5  | 322.2 | 626.4             |                    | 5 |
| 5 | 544.3  |       |                   | 526.3              | L   | 530.4  | 265.7 | 513.3             |                    | 4 |
| 6 | 657.4  | 329.2 |                   | 639.4              | I   | 417.3  | 209.1 | 400.3             |                    | 3 |
| 7 | 814.5  | 407.7 | 797.4             | 796.5              | R+1 | 304.2  | 152.6 | 287.2             |                    | 2 |
| 8 | 960.6  | 480.8 | 943.5             | 942.6              | K   | 147.1  |       | 130.1             |                    | 1 |

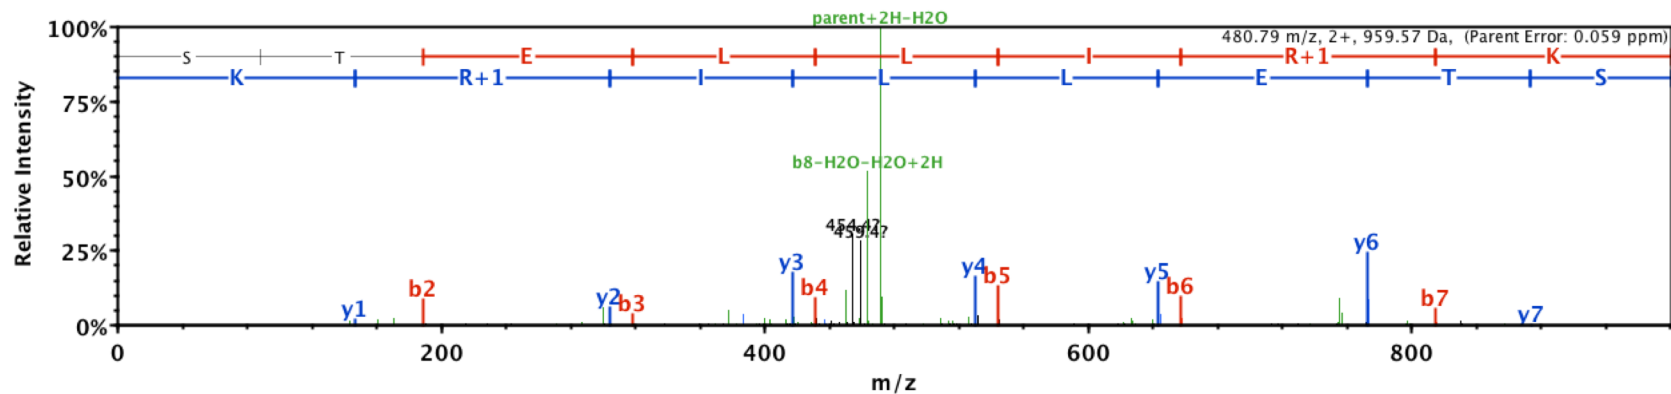

| B | B Ions | B+2H  | B-NH3 | B-H2O | AA  | Y Ions | Y+2H  | Y-NH3 | Y-H2O | Y |
|---|--------|-------|-------|-------|-----|--------|-------|-------|-------|---|
| 1 | 88.0   |       |       | 70.0  | S   | 960.6  | 480.8 | 943.5 | 942.6 | 8 |
| 2 | 189.1  |       |       | 171.1 | T   | 873.5  | 437.3 | 856.5 | 855.5 | 7 |
| 3 | 318.1  |       |       | 300.1 | E   | 772.5  | 386.8 | 755.5 | 754.5 | 6 |
| 4 | 431.2  |       |       | 413.2 | L   | 643.5  | 322.2 | 626.4 |       | 5 |
| 5 | 544.3  |       |       | 526.3 | L   | 530.4  | 265.7 | 513.3 |       | 4 |
| 6 | 657.4  | 329.2 |       | 639.4 | I   | 417.3  | 209.1 | 400.3 |       | 3 |
| 7 | 814.5  | 407.7 | 797.4 | 796.5 | R+1 | 304.2  | 152.6 | 287.2 |       | 2 |
| 8 | 960.6  | 480.8 | 943.5 | 942.6 | K   | 147.1  |       | 130.1 |       | 1 |

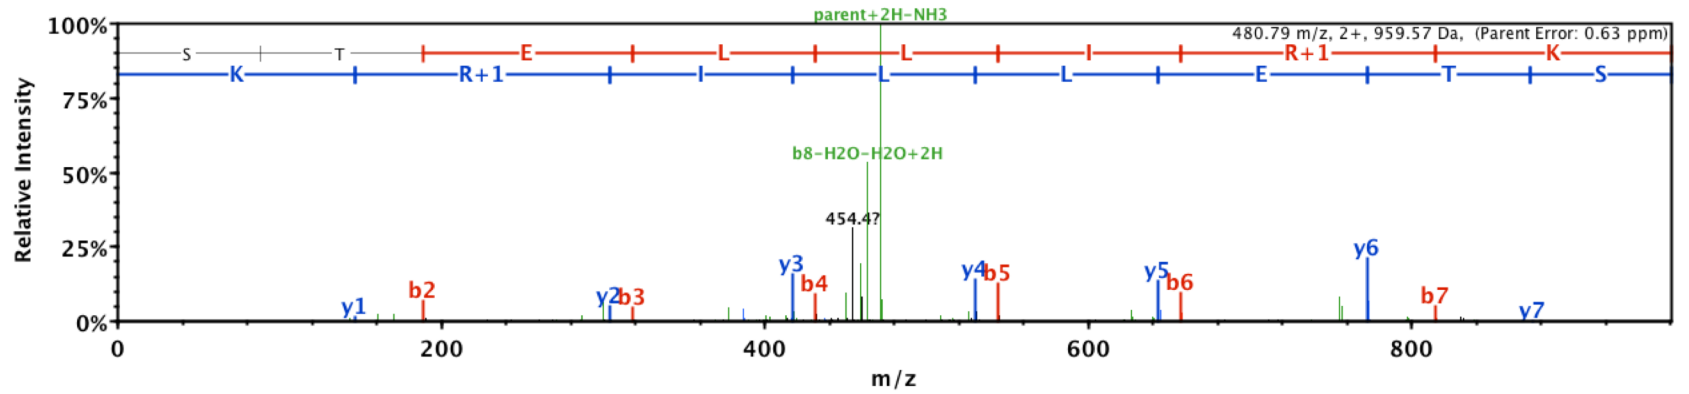

| B | B Ions | B+2H  | B-NH3 | B-H2O | AA  | Y Ions | Y+2H  | Y-NH3 | Y-H2O | Y |
|---|--------|-------|-------|-------|-----|--------|-------|-------|-------|---|
| 1 | 88.0   |       |       | 70.0  | S   | 960.6  | 480.8 | 943.5 | 942.6 | 8 |
| 2 | 189.1  |       |       | 171.1 | T   | 873.5  | 437.3 | 856.5 | 855.5 | 7 |
| 3 | 318.1  |       |       | 300.1 | E   | 772.5  | 386.8 | 755.5 | 754.5 | 6 |
| 4 | 431.2  |       |       | 413.2 | L   | 643.5  | 322.2 | 626.4 |       | 5 |
| 5 | 544.3  |       |       | 526.3 | L   | 530.4  | 265.7 | 513.3 |       | 4 |
| 6 | 657.4  | 329.2 |       | 639.4 | I   | 417.3  | 209.1 | 400.3 |       | 3 |
| 7 | 814.5  | 407.7 | 797.4 | 796.5 | R+1 | 304.2  | 152.6 | 287.2 |       | 2 |
| 8 | 960.6  | 480.8 | 943.5 | 942.6 | K   | 147.1  |       | 130.1 |       | 1 |

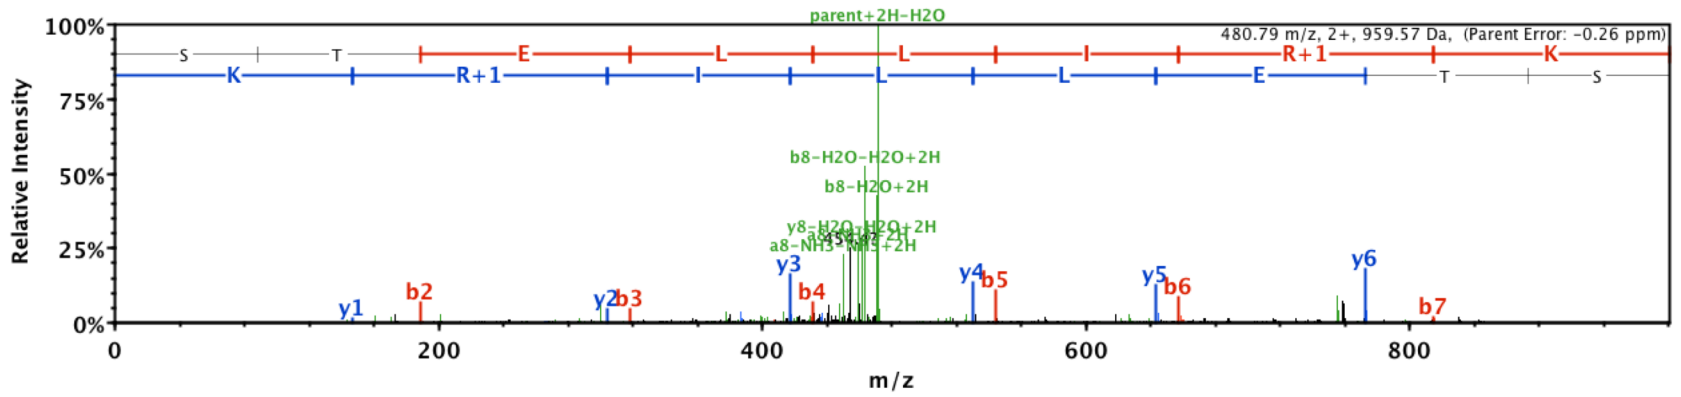

| B | B Ions | B+2H  | B-NH3 | B-H2O | AA  | Y Ions | Y+2H  | Y-NH3 | Y-H2O | Y |
|---|--------|-------|-------|-------|-----|--------|-------|-------|-------|---|
| 1 | 88.0   |       |       | 70.0  | S   | 960.6  | 480.8 | 943.5 | 942.6 | 8 |
| 2 | 189.1  |       |       | 171.1 | T   | 873.5  | 437.3 | 856.5 | 855.5 | 7 |
| 3 | 318.1  |       |       | 300.1 | E   | 772.5  | 386.8 | 755.5 | 754.5 | 6 |
| 4 | 431.2  |       |       | 413.2 | L   | 643.5  | 322.2 | 626.4 |       | 5 |
| 5 | 544.3  |       |       | 526.3 | L   | 530.4  | 265.7 | 513.3 |       | 4 |
| 6 | 657.4  | 329.2 |       | 639.4 | I   | 417.3  | 209.1 | 400.3 |       | 3 |
| 7 | 814.5  | 407.7 | 797.4 | 796.5 | R+1 | 304.2  | 152.6 | 287.2 |       | 2 |
| 8 | 960.6  | 480.8 | 943.5 | 942.6 | K   | 147.1  |       | 130.1 |       | 1 |

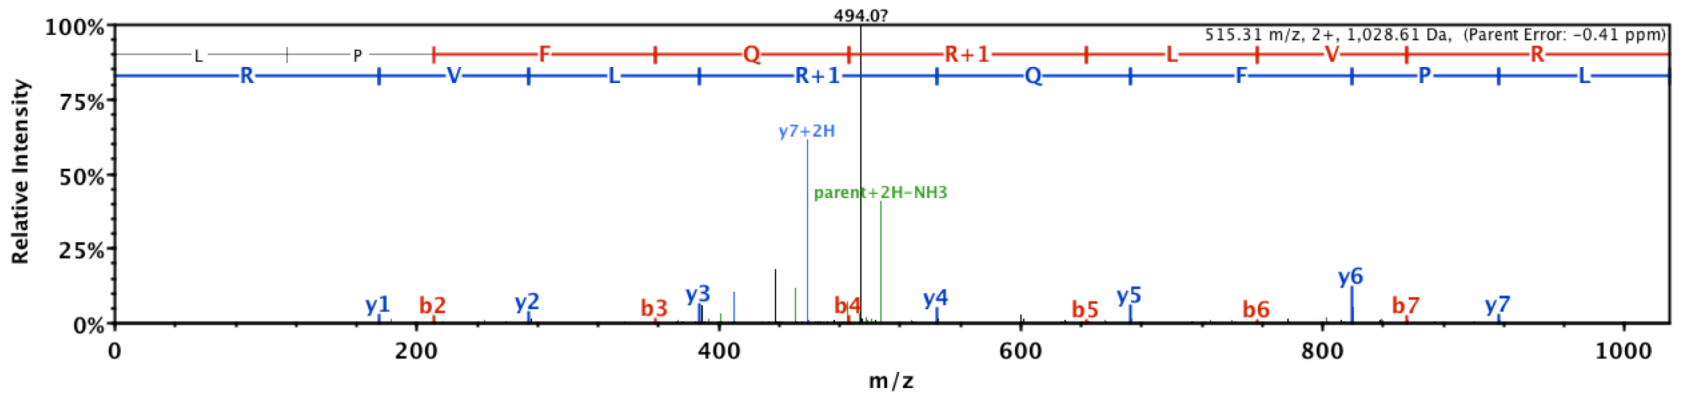

| B | B Ions  | B+2H  | B-NH3   | B-H2O | AA  | Y Ions  | Y+2H  | Y-NH3   | Y-H2O | Y |
|---|---------|-------|---------|-------|-----|---------|-------|---------|-------|---|
| 1 | 114.1   |       |         |       | L   | 1,029.6 | 515.3 | 1,012.6 |       | 8 |
| 2 | 211.1   |       |         |       | P   | 916.5   | 458.8 | 899.5   |       | 7 |
| 3 | 358.2   |       |         |       | F   | 819.5   | 410.2 | 802.5   |       | 6 |
| 4 | 486.3   |       | 469.2   |       | Q   | 672.4   | 336.7 | 655.4   |       | 5 |
| 5 | 643.4   | 322.2 | 626.3   |       | R+1 | 544.4   | 272.7 | 527.3   |       | 4 |
| 6 | 756.4   | 378.7 | 739.4   |       | L   | 387.3   |       | 370.2   |       | 3 |
| 7 | 855.5   | 428.3 | 838.5   |       | V   | 274.2   |       | 257.2   |       | 2 |
| 8 | 1,029.6 | 515.3 | 1,012.6 |       | R   | 175.1   |       | 158.1   |       | 1 |

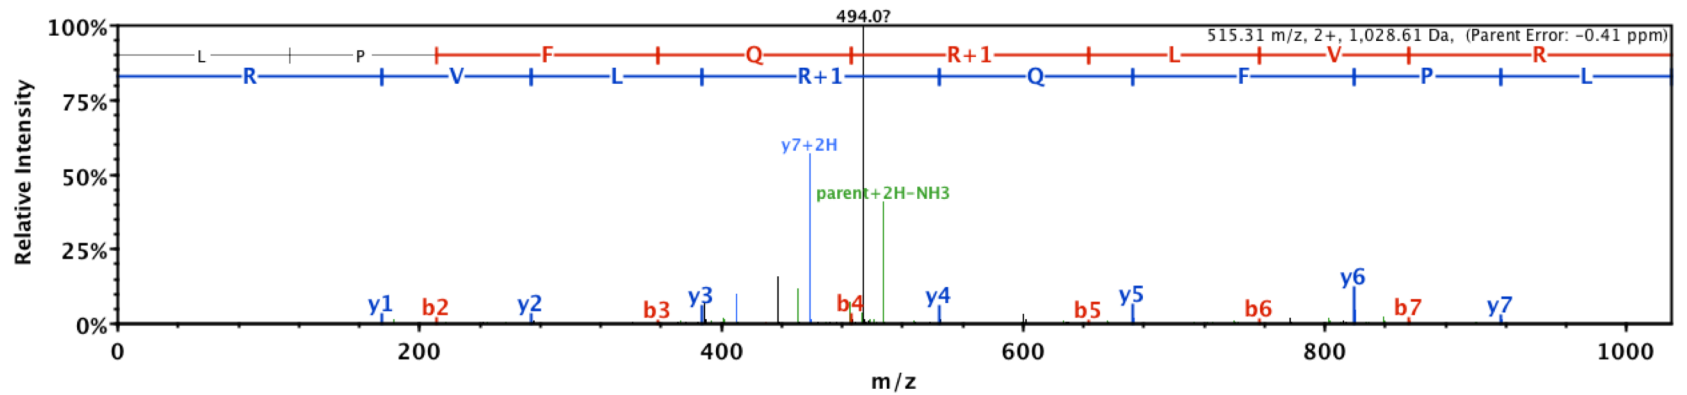

| B | B Ions  | B+2H  | B-NH3   | B-H2O | AA  | Y Ions  | Y+2H  | Y-NH3   | Y-H2O | Y |
|---|---------|-------|---------|-------|-----|---------|-------|---------|-------|---|
| 1 | 114.1   |       |         |       | L   | 1,029.6 | 515.3 | 1,012.6 |       | 8 |
| 2 | 211.1   |       |         |       | P   | 916.5   | 458.8 | 899.5   |       | 7 |
| 3 | 358.2   |       |         |       | F   | 819.5   | 410.2 | 802.5   |       | 6 |
| 4 | 486.3   |       | 469.2   |       | Q   | 672.4   | 336.7 | 655.4   |       | 5 |
| 5 | 643.4   | 322.2 | 626.3   |       | R+1 | 544.4   | 272.7 | 527.3   |       | 4 |
| 6 | 756.4   | 378.7 | 739.4   |       | L   | 387.3   |       | 370.2   |       | 3 |
| 7 | 855.5   | 428.3 | 838.5   |       | V   | 274.2   |       | 257.2   |       | 2 |
| 8 | 1,029.6 | 515.3 | 1,012.6 |       | R   | 175.1   |       | 158.1   |       | 1 |

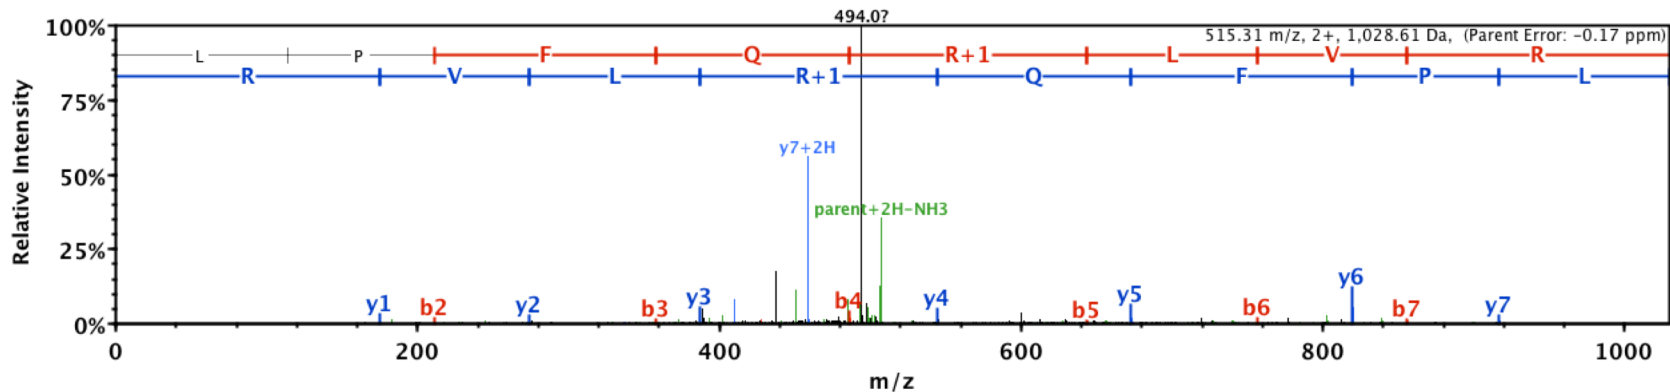

| B | B Ions  | B+2H  | B-NH3   | B-H2O | AA  | Y Ions  | Y+2H  | Y-NH3   | Y-H2O | Y |
|---|---------|-------|---------|-------|-----|---------|-------|---------|-------|---|
| 1 | 114.1   |       |         |       | L   | 1,029.6 | 515.3 | 1,012.6 |       | 8 |
| 2 | 211.1   |       |         |       | P   | 916.5   | 458.8 | 899.5   |       | 7 |
| 3 | 358.2   |       |         |       | F   | 819.5   | 410.2 | 802.5   |       | 6 |
| 4 | 486.3   |       | 469.2   |       | Q   | 672.4   | 336.7 | 655.4   |       | 5 |
| 5 | 643.4   | 322.2 | 626.3   |       | R+1 | 544.4   | 272.7 | 527.3   |       | 4 |
| 6 | 756.4   | 378.7 | 739.4   |       | L   | 387.3   |       | 370.2   |       | 3 |
| 7 | 855.5   | 428.3 | 838.5   |       | V   | 274.2   |       | 257.2   |       | 2 |
| 8 | 1,029.6 | 515.3 | 1,012.6 |       | R   | 175.1   |       | 158.1   |       | 1 |



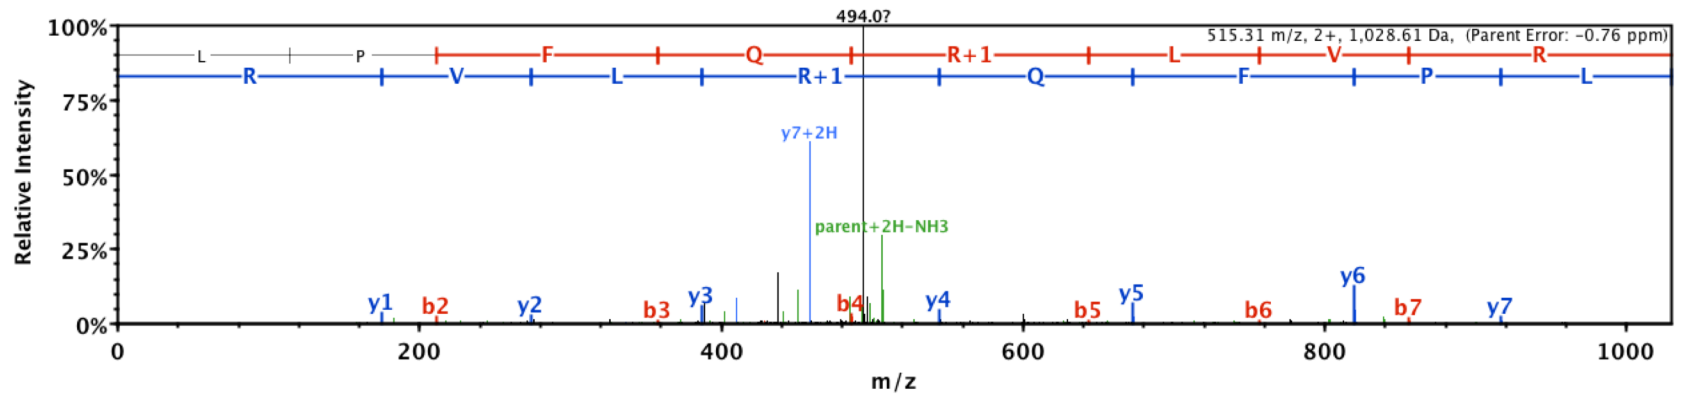

| B | B Ions  | B+2H  | B-NH3   | B-H2O | AA  | Y Ions  | Y+2H  | Y-NH3   | Y-H2O | Y |
|---|---------|-------|---------|-------|-----|---------|-------|---------|-------|---|
| 1 | 114.1   |       |         |       | L   | 1,029.6 | 515.3 | 1,012.6 |       | 8 |
| 2 | 211.1   |       |         |       | P   | 916.5   | 458.8 | 899.5   |       | 7 |
| 3 | 358.2   |       |         |       | F   | 819.5   | 410.2 | 802.5   |       | 6 |
| 4 | 486.3   |       | 469.2   |       | Q   | 672.4   | 336.7 | 655.4   |       | 5 |
| 5 | 643.4   | 322.2 | 626.3   |       | R+1 | 544.4   | 272.7 | 527.3   |       | 4 |
| 6 | 756.4   | 378.7 | 739.4   |       | L   | 387.3   |       | 370.2   |       | 3 |
| 7 | 855.5   | 428.3 | 838.5   |       | V   | 274.2   |       | 257.2   |       | 2 |
| 8 | 1,029.6 | 515.3 | 1,012.6 |       | R   | 175.1   |       | 158.1   |       | 1 |

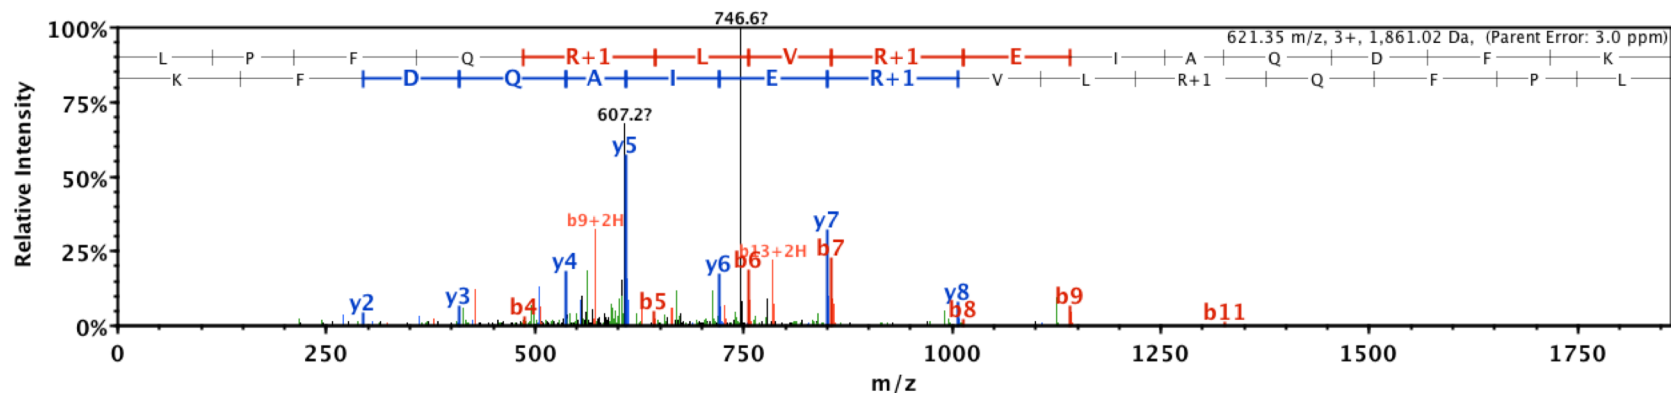

| B  | B Ions  | B+2H  | B-NH3   | B-H2O   | AA  | Y Ions  | Y+2H  | Y-NH3   | Y-H2O   | Y  |
|----|---------|-------|---------|---------|-----|---------|-------|---------|---------|----|
| 1  | 114.1   | 57.5  |         |         | L   | 1,862.0 | 931.5 | 1,845.0 | 1,844.0 | 15 |
| 2  | 211.1   | 106.1 |         |         | P   | 1,748.9 | 875.0 | 1,731.9 | 1,730.9 | 14 |
| 3  | 358.2   | 179.6 |         |         | F   | 1,651.9 | 826.4 | 1,634.9 | 1,633.9 | 13 |
| 4  | 486.3   | 243.6 | 469.2   |         | Q   | 1,504.8 | 752.9 | 1,487.8 | 1,486.8 | 12 |
| 5  | 643.4   | 322.2 | 626.3   |         | R+1 | 1,376.8 | 688.9 | 1,359.7 | 1,358.7 | 11 |
| 6  | 756.4   | 378.7 | 739.4   |         | L   | 1,219.7 | 610.3 | 1,202.6 | 1,201.7 | 10 |
| 7  | 855.5   | 428.3 | 838.5   |         | V   | 1,106.6 | 553.8 | 1,089.6 | 1,088.6 | 9  |
| 8  | 1,012.6 | 506.8 | 995.6   |         | R+1 | 1,007.5 | 504.3 | 990.5   | 989.5   | 8  |
| 9  | 1,141.6 | 571.3 | 1,124.6 | 1,123.6 | E   | 850.4   | 425.7 | 833.4   | 832.4   | 7  |
| 10 | 1,254.7 | 627.9 | 1,237.7 | 1,236.7 | I   | 721.4   | 361.2 | 704.4   | 703.4   | 6  |
| 11 | 1,325.8 | 663.4 | 1,308.7 | 1,307.7 | A   | 608.3   | 304.7 | 591.3   | 590.3   | 5  |
| 12 | 1,453.8 | 727.4 | 1,436.8 | 1,435.8 | Q   | 537.3   | 269.1 | 520.2   | 519.3   | 4  |
| 13 | 1,568.8 | 784.9 | 1,551.8 | 1,550.8 | D   | 409.2   | 205.1 | 392.2   | 391.2   | 3  |
| 14 | 1,715.9 | 858.5 | 1,698.9 | 1,697.9 | F   | 294.2   | 147.6 | 277.2   |         | 2  |
| 15 | 1,862.0 | 931.5 | 1,845.0 | 1,844.0 | K   | 147.1   | 74.1  | 130.1   |         | 1  |

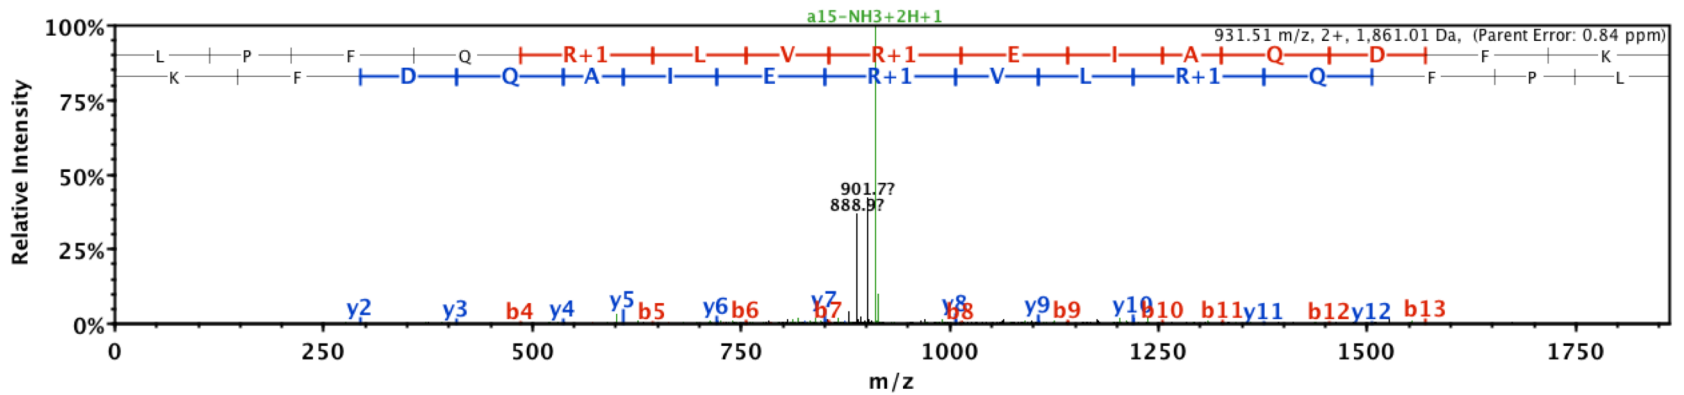

| B  | B Ions  | B+2H  | B-NH3   | B-H2O   | AA  | Y Ions  | Y+2H  | Y-NH3   | Y-H2O   | Y  |
|----|---------|-------|---------|---------|-----|---------|-------|---------|---------|----|
| 1  | 114.1   |       |         |         | L   | 1,862.0 | 931.5 | 1,845.0 | 1,844.0 | 15 |
| 2  | 211.1   |       |         |         | P   | 1,748.9 | 875.0 | 1,731.9 | 1,730.9 | 14 |
| 3  | 358.2   |       |         |         | F   | 1,651.9 | 826.4 | 1,634.9 | 1,633.9 | 13 |
| 4  | 486.3   |       | 469.2   |         | Q   | 1,504.8 | 752.9 | 1,487.8 | 1,486.8 | 12 |
| 5  | 643.4   | 322.2 | 626.3   |         | R+1 | 1,376.8 | 688.9 | 1,359.7 | 1,358.7 | 11 |
| 6  | 756.4   | 378.7 | 739.4   |         | L   | 1,219.7 | 610.3 | 1,202.6 | 1,201.7 | 10 |
| 7  | 855.5   | 428.3 | 838.5   |         | V   | 1,106.6 | 553.8 | 1,089.6 | 1,088.6 | 9  |
| 8  | 1,012.6 | 506.8 | 995.6   |         | R+1 | 1,007.5 | 504.3 | 990.5   | 989.5   | 8  |
| 9  | 1,141.6 | 571.3 | 1,124.6 | 1,123.6 | E   | 850.4   | 425.7 | 833.4   | 832.4   | 7  |
| 10 | 1,254.7 | 627.9 | 1,237.7 | 1,236.7 | I   | 721.4   | 361.2 | 704.4   | 703.4   | 6  |
| 11 | 1,325.8 | 663.4 | 1,308.7 | 1,307.7 | A   | 608.3   |       | 591.3   | 590.3   | 5  |
| 12 | 1,453.8 | 727.4 | 1,436.8 | 1,435.8 | Q   | 537.3   |       | 520.2   | 519.3   | 4  |
| 13 | 1,568.8 | 784.9 | 1,551.8 | 1,550.8 | D   | 409.2   |       | 392.2   | 391.2   | 3  |
| 14 | 1,715.9 | 858.5 | 1,698.9 | 1,697.9 | F   | 294.2   |       | 277.2   |         | 2  |
| 15 | 1,862.0 | 931.5 | 1,845.0 | 1,844.0 | K   | 147.1   |       | 130.1   |         | 1  |

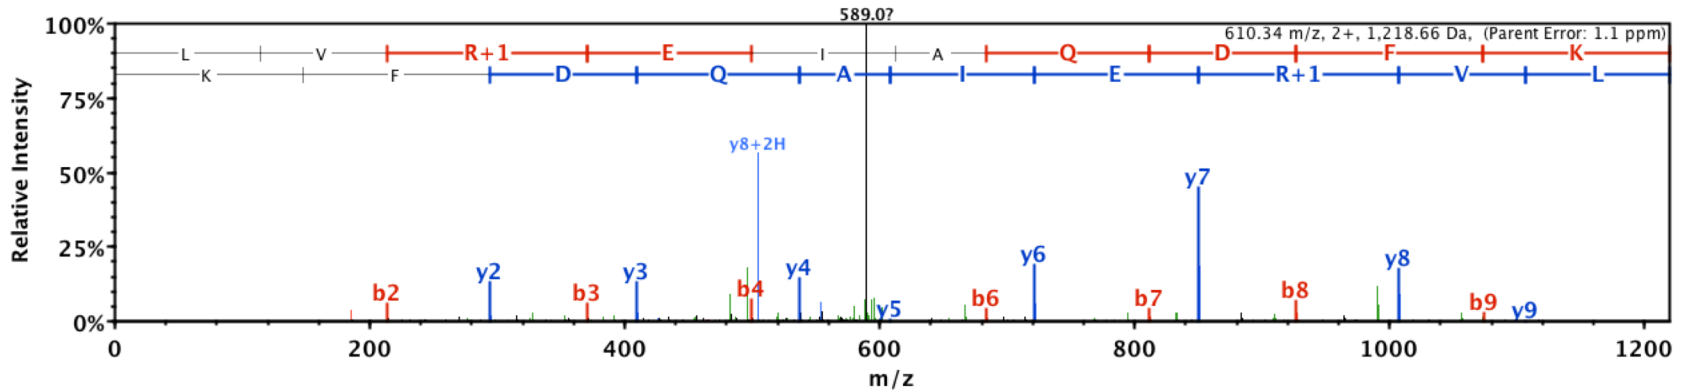

| B  | B Ions  | B+2H  | B-NH3   | B-H2O   | AA  | Y Ions  | Y+2H  | Y-NH3   | Y-H2O   | Y  |
|----|---------|-------|---------|---------|-----|---------|-------|---------|---------|----|
| 1  | 114.1   |       |         |         | L   | 1,219.7 | 610.3 | 1,202.6 | 1,201.7 | 10 |
| 2  | 213.2   |       |         |         | V   | 1,106.6 | 553.8 | 1,089.6 | 1,088.6 | 9  |
| 3  | 370.2   | 185.6 | 353.2   |         | R+1 | 1,007.5 | 504.3 | 990.5   | 989.5   | 8  |
| 4  | 499.3   | 250.1 | 482.3   | 481.3   | E   | 850.4   | 425.7 | 833.4   | 832.4   | 7  |
| 5  | 612.4   | 306.7 | 595.3   | 594.4   | I   | 721.4   | 361.2 | 704.4   | 703.4   | 6  |
| 6  | 683.4   | 342.2 | 666.4   | 665.4   | A   | 608.3   |       | 591.3   | 590.3   | 5  |
| 7  | 811.5   | 406.2 | 794.4   | 793.5   | Q   | 537.3   |       | 520.2   | 519.3   | 4  |
| 8  | 926.5   | 463.8 | 909.5   | 908.5   | D   | 409.2   |       | 392.2   | 391.2   | 3  |
| 9  | 1,073.6 | 537.3 | 1,056.5 | 1,055.6 | F   | 294.2   |       | 277.2   |         | 2  |
| 10 | 1,219.7 | 610.3 | 1,202.6 | 1,201.7 | K   | 147.1   |       | 130.1   |         | 1  |

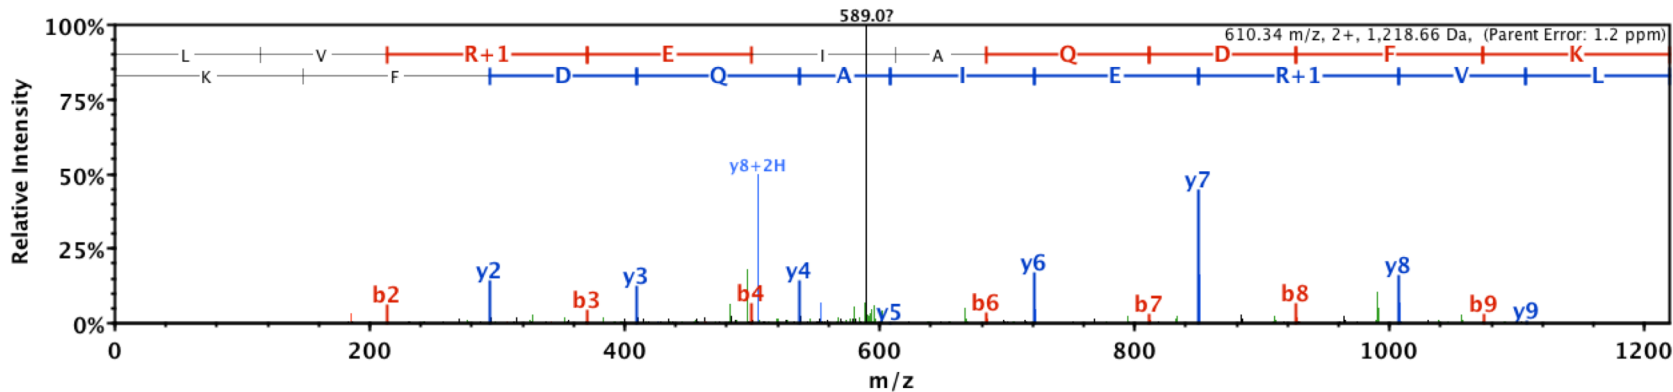

| B  | B Ions  | B+2H  | B-NH3   | B-H2O   | AA  | Y Ions  | Y+2H  | Y-NH3   | Y-H2O   | Y  |
|----|---------|-------|---------|---------|-----|---------|-------|---------|---------|----|
| 1  | 114.1   |       |         |         | L   | 1,219.7 | 610.3 | 1,202.6 | 1,201.7 | 10 |
| 2  | 213.2   |       |         |         | V   | 1,106.6 | 553.8 | 1,089.6 | 1,088.6 | 9  |
| 3  | 370.2   | 185.6 | 353.2   |         | R+1 | 1,007.5 | 504.3 | 990.5   | 989.5   | 8  |
| 4  | 499.3   | 250.1 | 482.3   | 481.3   | E   | 850.4   | 425.7 | 833.4   | 832.4   | 7  |
| 5  | 612.4   | 306.7 | 595.3   | 594.4   | I   | 721.4   | 361.2 | 704.4   | 703.4   | 6  |
| 6  | 683.4   | 342.2 | 666.4   | 665.4   | A   | 608.3   |       | 591.3   | 590.3   | 5  |
| 7  | 811.5   | 406.2 | 794.4   | 793.5   | Q   | 537.3   |       | 520.2   | 519.3   | 4  |
| 8  | 926.5   | 463.8 | 909.5   | 908.5   | D   | 409.2   |       | 392.2   | 391.2   | 3  |
| 9  | 1,073.6 | 537.3 | 1,056.5 | 1,055.6 | F   | 294.2   |       | 277.2   |         | 2  |
| 10 | 1,219.7 | 610.3 | 1,202.6 | 1,201.7 | K   | 147.1   |       | 130.1   |         | 1  |

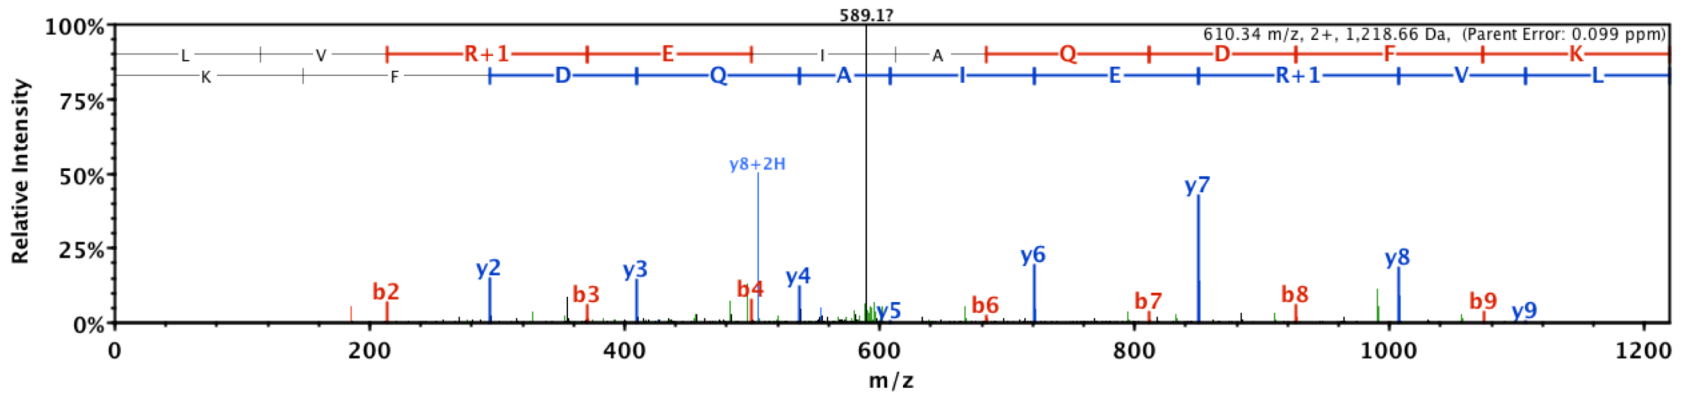

| B  | B Ions  | B+2H  | B-NH3   | B-H2O   | AA  | Y Ions  | Y+2H  | Y-NH3   | Y-H2O   | Y  |
|----|---------|-------|---------|---------|-----|---------|-------|---------|---------|----|
| 1  | 114.1   |       |         |         | L   | 1,219.7 | 610.3 | 1,202.6 | 1,201.7 | 10 |
| 2  | 213.2   |       |         |         | V   | 1,106.6 | 553.8 | 1,089.6 | 1,088.6 | 9  |
| 3  | 370.2   | 185.6 | 353.2   |         | R+1 | 1,007.5 | 504.3 | 990.5   | 989.5   | 8  |
| 4  | 499.3   | 250.1 | 482.3   | 481.3   | E   | 850.4   | 425.7 | 833.4   | 832.4   | 7  |
| 5  | 612.4   | 306.7 | 595.3   | 594.4   | I   | 721.4   | 361.2 | 704.4   | 703.4   | 6  |
| 6  | 683.4   | 342.2 | 666.4   | 665.4   | A   | 608.3   |       | 591.3   | 590.3   | 5  |
| 7  | 811.5   | 406.2 | 794.4   | 793.5   | Q   | 537.3   |       | 520.2   | 519.3   | 4  |
| 8  | 926.5   | 463.8 | 909.5   | 908.5   | D   | 409.2   |       | 392.2   | 391.2   | 3  |
| 9  | 1,073.6 | 537.3 | 1,056.5 | 1,055.6 | F   | 294.2   |       | 277.2   |         | 2  |
| 10 | 1,219.7 | 610.3 | 1,202.6 | 1,201.7 | K   | 147.1   |       | 130.1   |         | 1  |

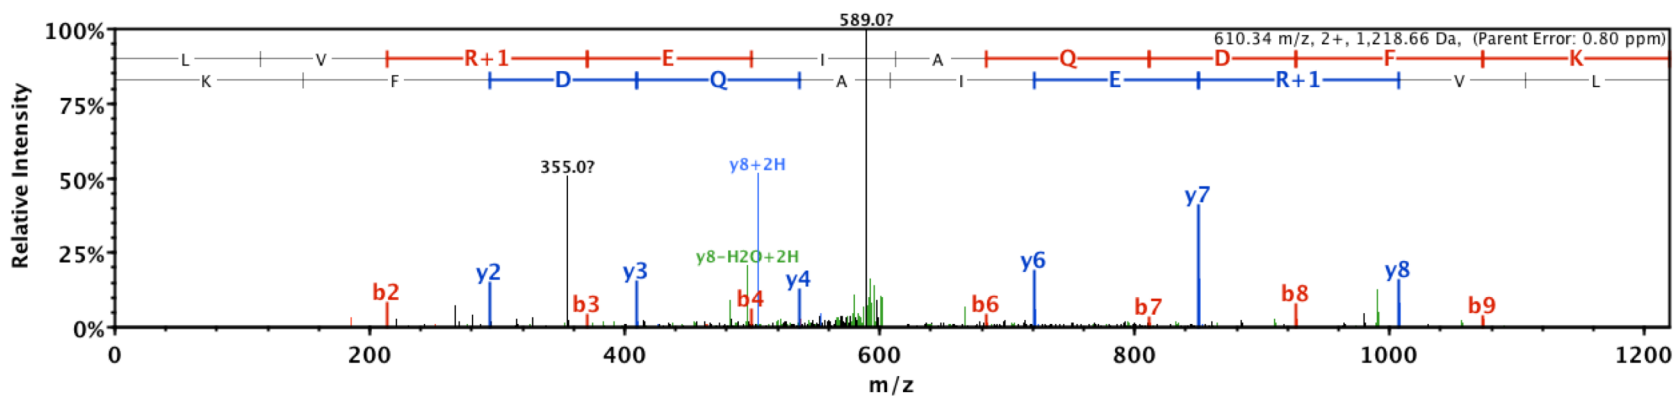

| B  | B Ions  | B+2H  | B-NH3   | B-H2O   | AA  | Y Ions  | Y+2H  | Y-NH3   | Y-H2O   | Y  |
|----|---------|-------|---------|---------|-----|---------|-------|---------|---------|----|
| 1  | 114.1   |       |         |         | L   | 1,219.7 | 610.3 | 1,202.6 | 1,201.7 | 10 |
| 2  | 213.2   |       |         |         | V   | 1,106.6 | 553.8 | 1,089.6 | 1,088.6 | 9  |
| 3  | 370.2   | 185.6 | 353.2   |         | R+1 | 1,007.5 | 504.3 | 990.5   | 989.5   | 8  |
| 4  | 499.3   | 250.1 | 482.3   | 481.3   | E   | 850.4   | 425.7 | 833.4   | 832.4   | 7  |
| 5  | 612.4   | 306.7 | 595.3   | 594.4   | I   | 721.4   | 361.2 | 704.4   | 703.4   | 6  |
| 6  | 683.4   | 342.2 | 666.4   | 665.4   | A   | 608.3   |       | 591.3   | 590.3   | 5  |
| 7  | 811.5   | 406.2 | 794.4   | 793.5   | Q   | 537.3   |       | 520.2   | 519.3   | 4  |
| 8  | 926.5   | 463.8 | 909.5   | 908.5   | D   | 409.2   |       | 392.2   | 391.2   | 3  |
| 9  | 1,073.6 | 537.3 | 1,056.5 | 1,055.6 | F   | 294.2   |       | 277.2   |         | 2  |
| 10 | 1,219.7 | 610.3 | 1,202.6 | 1,201.7 | K   | 147.1   |       | 130.1   |         | 1  |

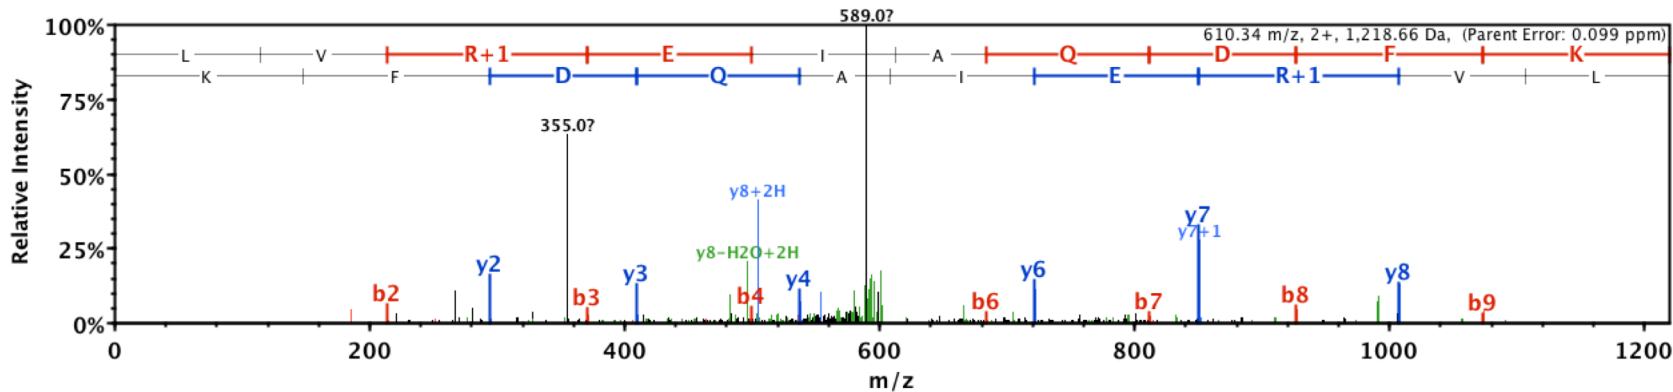

| B  | B Ions  | B+2H  | B-NH3   | B-H2O   | AA  | Y Ions  | Y+2H  | Y-NH3   | Y-H2O   | Y  |
|----|---------|-------|---------|---------|-----|---------|-------|---------|---------|----|
| 1  | 114.1   |       |         |         | L   | 1,219.7 | 610.3 | 1,202.6 | 1,201.7 | 10 |
| 2  | 213.2   |       |         |         | V   | 1,106.6 | 553.8 | 1,089.6 | 1,088.6 | 9  |
| 3  | 370.2   | 185.6 | 353.2   |         | R+1 | 1,007.5 | 504.3 | 990.5   | 989.5   | 8  |
| 4  | 499.3   | 250.1 | 482.3   | 481.3   | E   | 850.4   | 425.7 | 833.4   | 832.4   | 7  |
| 5  | 612.4   | 306.7 | 595.3   | 594.4   | I   | 721.4   | 361.2 | 704.4   | 703.4   | 6  |
| 6  | 683.4   | 342.2 | 666.4   | 665.4   | A   | 608.3   |       | 591.3   | 590.3   | 5  |
| 7  | 811.5   | 406.2 | 794.4   | 793.5   | Q   | 537.3   |       | 520.2   | 519.3   | 4  |
| 8  | 926.5   | 463.8 | 909.5   | 908.5   | D   | 409.2   |       | 392.2   | 391.2   | 3  |
| 9  | 1,073.6 | 537.3 | 1,056.5 | 1,055.6 | F   | 294.2   |       | 277.2   |         | 2  |
| 10 | 1,219.7 | 610.3 | 1,202.6 | 1,201.7 | K   | 147.1   |       | 130.1   |         | 1  |



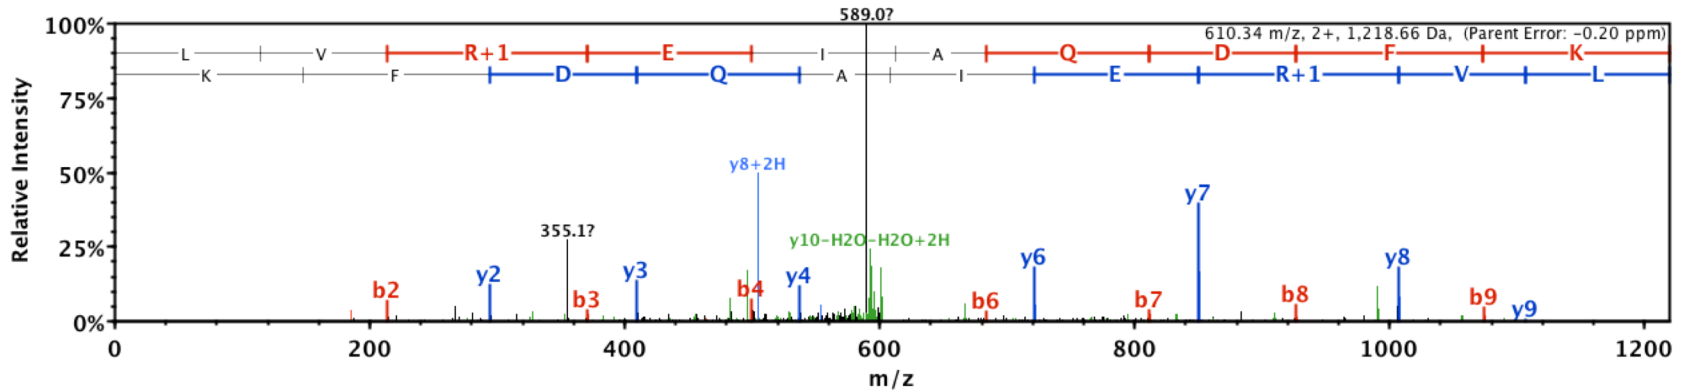

| B  | B Ions  | B+2H  | B-NH3   | B-H2O   | AA  | Y Ions  | Y+2H  | Y-NH3   | Y-H2O   | Y  |
|----|---------|-------|---------|---------|-----|---------|-------|---------|---------|----|
| 1  | 114.1   |       |         |         | L   | 1,219.7 | 610.3 | 1,202.6 | 1,201.7 | 10 |
| 2  | 213.2   |       |         |         | V   | 1,106.6 | 553.8 | 1,089.6 | 1,088.6 | 9  |
| 3  | 370.2   | 185.6 | 353.2   |         | R+1 | 1,007.5 | 504.3 | 990.5   | 989.5   | 8  |
| 4  | 499.3   | 250.1 | 482.3   | 481.3   | E   | 850.4   | 425.7 | 833.4   | 832.4   | 7  |
| 5  | 612.4   | 306.7 | 595.3   | 594.4   | I   | 721.4   | 361.2 | 704.4   | 703.4   | 6  |
| 6  | 683.4   | 342.2 | 666.4   | 665.4   | A   | 608.3   |       | 591.3   | 590.3   | 5  |
| 7  | 811.5   | 406.2 | 794.4   | 793.5   | Q   | 537.3   |       | 520.2   | 519.3   | 4  |
| 8  | 926.5   | 463.8 | 909.5   | 908.5   | D   | 409.2   |       | 392.2   | 391.2   | 3  |
| 9  | 1,073.6 | 537.3 | 1,056.5 | 1,055.6 | F   | 294.2   |       | 277.2   |         | 2  |
| 10 | 1,219.7 | 610.3 | 1,202.6 | 1,201.7 | K   | 147.1   |       | 130.1   |         | 1  |

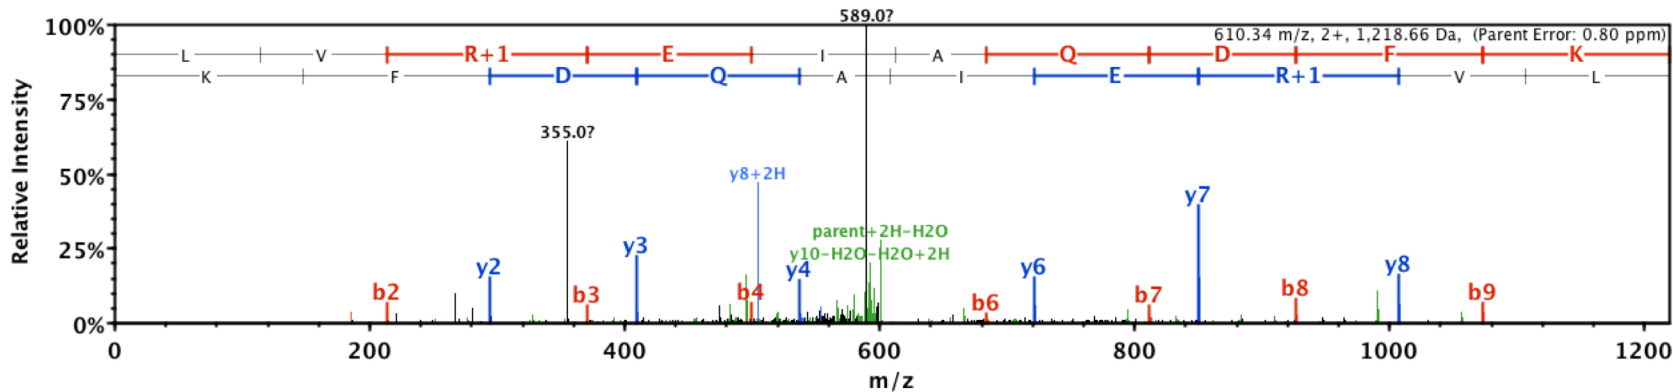

| B  | B Ions  | B+2H  | B-NH3   | B-H2O   | AA  | Y Ions  | Y+2H  | Y-NH3   | Y-H2O   | Y  |
|----|---------|-------|---------|---------|-----|---------|-------|---------|---------|----|
| 1  | 114.1   |       |         |         | L   | 1,219.7 | 610.3 | 1,202.6 | 1,201.7 | 10 |
| 2  | 213.2   |       |         |         | V   | 1,106.6 | 553.8 | 1,089.6 | 1,088.6 | 9  |
| 3  | 370.2   | 185.6 | 353.2   |         | R+1 | 1,007.5 | 504.3 | 990.5   | 989.5   | 8  |
| 4  | 499.3   | 250.1 | 482.3   | 481.3   | E   | 850.4   | 425.7 | 833.4   | 832.4   | 7  |
| 5  | 612.4   | 306.7 | 595.3   | 594.4   | I   | 721.4   | 361.2 | 704.4   | 703.4   | 6  |
| 6  | 683.4   | 342.2 | 666.4   | 665.4   | A   | 608.3   |       | 591.3   | 590.3   | 5  |
| 7  | 811.5   | 406.2 | 794.4   | 793.5   | Q   | 537.3   |       | 520.2   | 519.3   | 4  |
| 8  | 926.5   | 463.8 | 909.5   | 908.5   | D   | 409.2   |       | 392.2   | 391.2   | 3  |
| 9  | 1,073.6 | 537.3 | 1,056.5 | 1,055.6 | F   | 294.2   |       | 277.2   |         | 2  |
| 10 | 1,219.7 | 610.3 | 1,202.6 | 1,201.7 | K   | 147.1   |       | 130.1   |         | 1  |

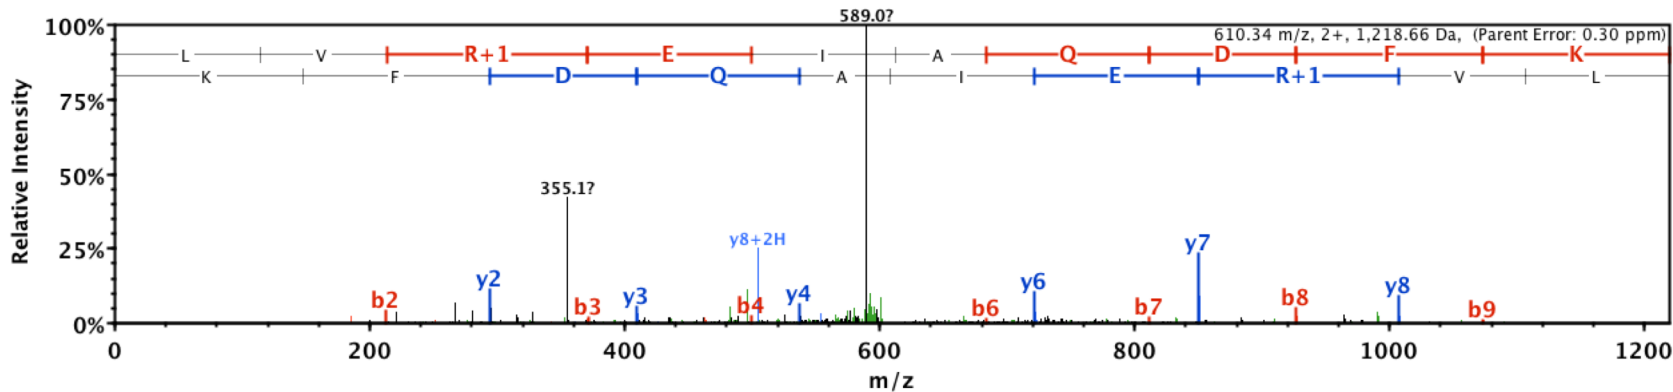

| B  | B Ions  | B+2H  | B-NH3   | B-H2O   | AA  | Y Ions  | Y+2H  | Y-NH3   | Y-H2O   | Y  |
|----|---------|-------|---------|---------|-----|---------|-------|---------|---------|----|
| 1  | 114.1   |       |         |         | L   | 1,219.7 | 610.3 | 1,202.6 | 1,201.7 | 10 |
| 2  | 213.2   |       |         |         | V   | 1,106.6 | 553.8 | 1,089.6 | 1,088.6 | 9  |
| 3  | 370.2   | 185.6 | 353.2   |         | R+1 | 1,007.5 | 504.3 | 990.5   | 989.5   | 8  |
| 4  | 499.3   | 250.1 | 482.3   | 481.3   | E   | 850.4   | 425.7 | 833.4   | 832.4   | 7  |
| 5  | 612.4   | 306.7 | 595.3   | 594.4   | I   | 721.4   | 361.2 | 704.4   | 703.4   | 6  |
| 6  | 683.4   | 342.2 | 666.4   | 665.4   | A   | 608.3   |       | 591.3   | 590.3   | 5  |
| 7  | 811.5   | 406.2 | 794.4   | 793.5   | Q   | 537.3   |       | 520.2   | 519.3   | 4  |
| 8  | 926.5   | 463.8 | 909.5   | 908.5   | D   | 409.2   |       | 392.2   | 391.2   | 3  |
| 9  | 1,073.6 | 537.3 | 1,056.5 | 1,055.6 | F   | 294.2   |       | 277.2   |         | 2  |
| 10 | 1,219.7 | 610.3 | 1,202.6 | 1,201.7 | K   | 147.1   |       | 130.1   |         | 1  |

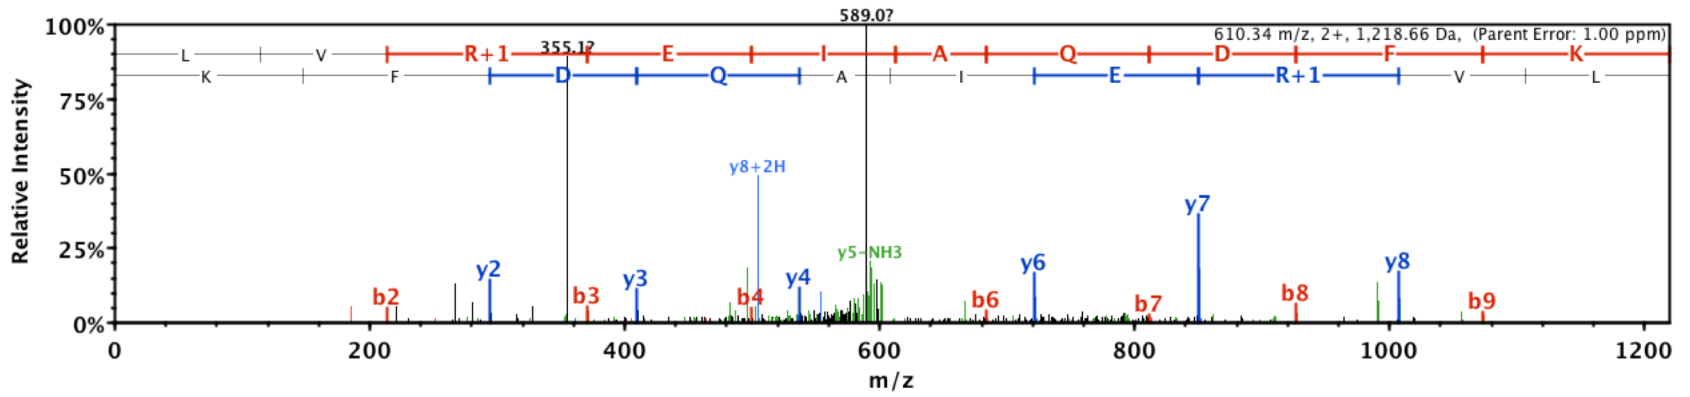

| B  | B Ions  | B+2H  | B-NH3   | B-H2O   | AA  | Y Ions  | Y+2H  | Y-NH3   | Y-H2O   | Y  |
|----|---------|-------|---------|---------|-----|---------|-------|---------|---------|----|
| 1  | 114.1   |       |         |         | L   | 1,219.7 | 610.3 | 1,202.6 | 1,201.7 | 10 |
| 2  | 213.2   |       |         |         | V   | 1,106.6 | 553.8 | 1,089.6 | 1,088.6 | 9  |
| 3  | 370.2   | 185.6 | 353.2   |         | R+1 | 1,007.5 | 504.3 | 990.5   | 989.5   | 8  |
| 4  | 499.3   | 250.1 | 482.3   | 481.3   | E   | 850.4   | 425.7 | 833.4   | 832.4   | 7  |
| 5  | 612.4   | 306.7 | 595.3   | 594.4   | I   | 721.4   | 361.2 | 704.4   | 703.4   | 6  |
| 6  | 683.4   | 342.2 | 666.4   | 665.4   | A   | 608.3   |       | 591.3   | 590.3   | 5  |
| 7  | 811.5   | 406.2 | 794.4   | 793.5   | Q   | 537.3   |       | 520.2   | 519.3   | 4  |
| 8  | 926.5   | 463.8 | 909.5   | 908.5   | D   | 409.2   |       | 392.2   | 391.2   | 3  |
| 9  | 1,073.6 | 537.3 | 1,056.5 | 1,055.6 | F   | 294.2   |       | 277.2   |         | 2  |
| 10 | 1,219.7 | 610.3 | 1,202.6 | 1,201.7 | K   | 147.1   |       | 130.1   |         | 1  |

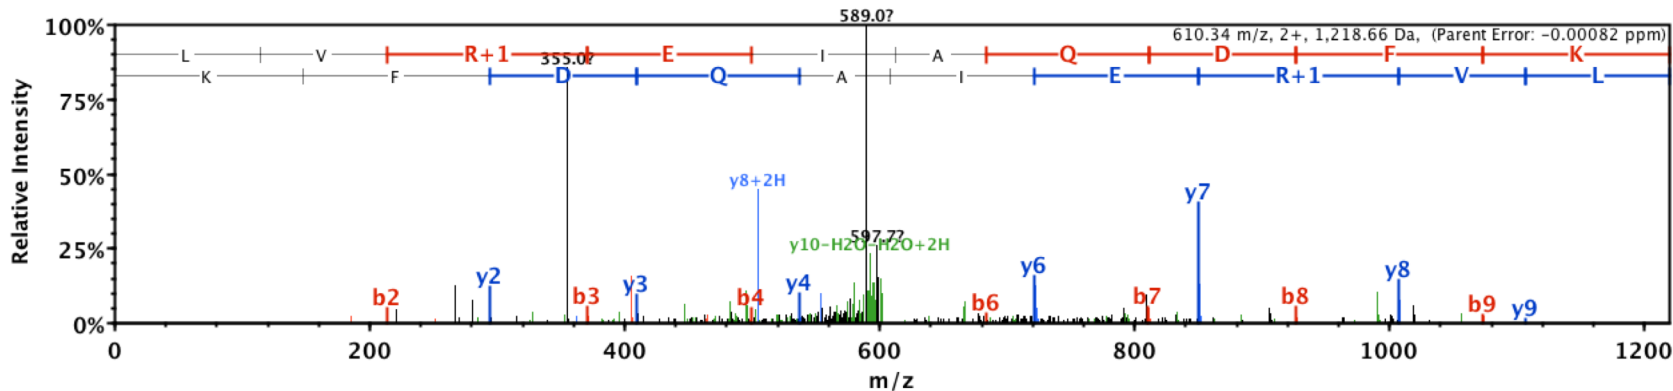

| B  | B Ions  | B+2H  | B-NH3   | B-H2O   | AA  | Y Ions  | Y+2H  | Y-NH3   | Y-H2O   | Y  |
|----|---------|-------|---------|---------|-----|---------|-------|---------|---------|----|
| 1  | 114.1   |       |         |         | L   | 1,219.7 | 610.3 | 1,202.6 | 1,201.7 | 10 |
| 2  | 213.2   |       |         |         | V   | 1,106.6 | 553.8 | 1,089.6 | 1,088.6 | 9  |
| 3  | 370.2   | 185.6 | 353.2   |         | R+1 | 1,007.5 | 504.3 | 990.5   | 989.5   | 8  |
| 4  | 499.3   | 250.1 | 482.3   | 481.3   | E   | 850.4   | 425.7 | 833.4   | 832.4   | 7  |
| 5  | 612.4   | 306.7 | 595.3   | 594.4   | I   | 721.4   | 361.2 | 704.4   | 703.4   | 6  |
| 6  | 683.4   | 342.2 | 666.4   | 665.4   | A   | 608.3   |       | 591.3   | 590.3   | 5  |
| 7  | 811.5   | 406.2 | 794.4   | 793.5   | Q   | 537.3   |       | 520.2   | 519.3   | 4  |
| 8  | 926.5   | 463.8 | 909.5   | 908.5   | D   | 409.2   |       | 392.2   | 391.2   | 3  |
| 9  | 1,073.6 | 537.3 | 1,056.5 | 1,055.6 | F   | 294.2   |       | 277.2   |         | 2  |
| 10 | 1,219.7 | 610.3 | 1,202.6 | 1,201.7 | K   | 147.1   |       | 130.1   |         | 1  |

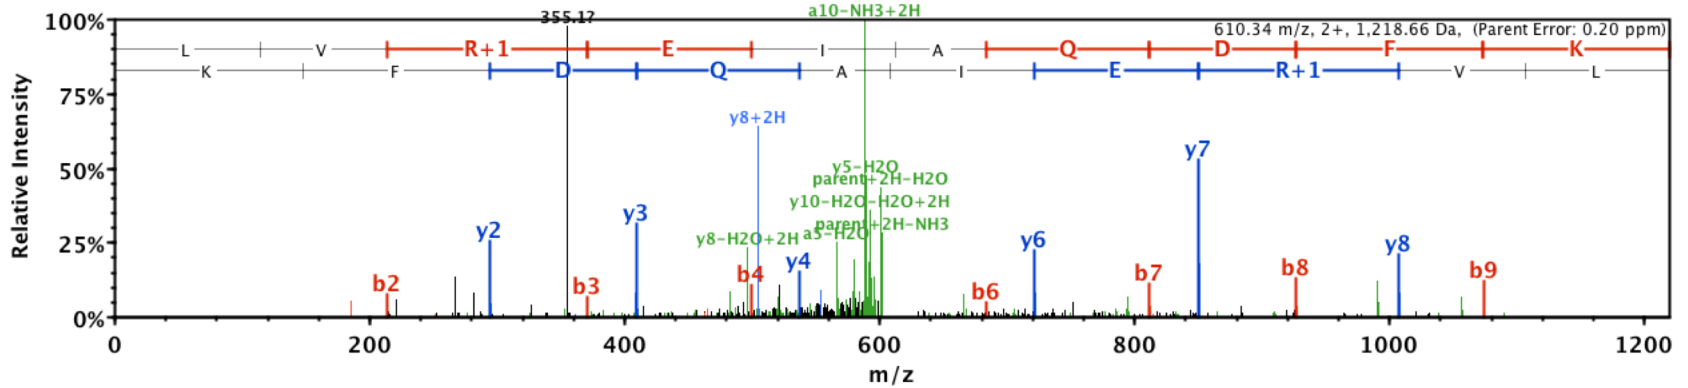

| B  | B Ions  | B+2H  | B-NH3   | B-H2O   | AA  | Y Ions  | Y+2H  | Y-NH3   | Y-H2O   | Y  |
|----|---------|-------|---------|---------|-----|---------|-------|---------|---------|----|
| 1  | 114.1   |       |         |         | L   | 1,219.7 | 610.3 | 1,202.6 | 1,201.7 | 10 |
| 2  | 213.2   |       |         |         | V   | 1,106.6 | 553.8 | 1,089.6 | 1,088.6 | 9  |
| 3  | 370.2   | 185.6 | 353.2   |         | R+1 | 1,007.5 | 504.3 | 990.5   | 989.5   | 8  |
| 4  | 499.3   | 250.1 | 482.3   | 481.3   | E   | 850.4   | 425.7 | 833.4   | 832.4   | 7  |
| 5  | 612.4   | 306.7 | 595.3   | 594.4   | I   | 721.4   | 361.2 | 704.4   | 703.4   | 6  |
| 6  | 683.4   | 342.2 | 666.4   | 665.4   | A   | 608.3   |       | 591.3   | 590.3   | 5  |
| 7  | 811.5   | 406.2 | 794.4   | 793.5   | Q   | 537.3   |       | 520.2   | 519.3   | 4  |
| 8  | 926.5   | 463.8 | 909.5   | 908.5   | D   | 409.2   |       | 392.2   | 391.2   | 3  |
| 9  | 1,073.6 | 537.3 | 1,056.5 | 1,055.6 | F   | 294.2   |       | 277.2   |         | 2  |
| 10 | 1,219.7 | 610.3 | 1,202.6 | 1,201.7 | K   | 147.1   |       | 130.1   |         | 1  |

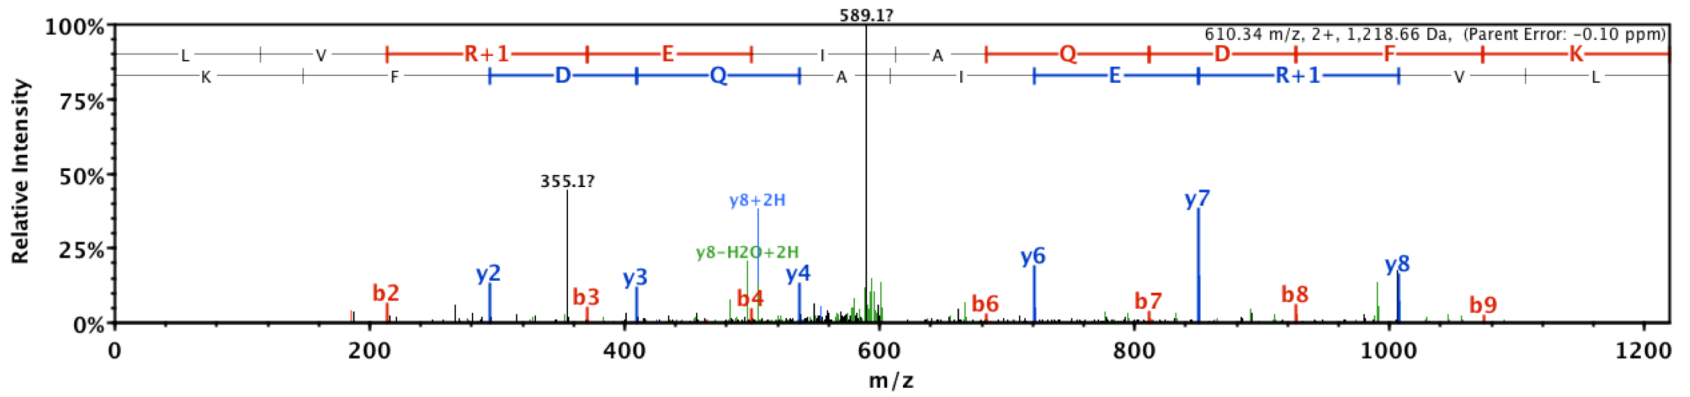

| B  | B Ions  | B+2H  | B-NH3   | B-H2O   | AA  | Y Ions  | Y+2H  | Y-NH3   | Y-H2O   | Y  |
|----|---------|-------|---------|---------|-----|---------|-------|---------|---------|----|
| 1  | 114.1   |       |         |         | L   | 1,219.7 | 610.3 | 1,202.6 | 1,201.7 | 10 |
| 2  | 213.2   |       |         |         | V   | 1,106.6 | 553.8 | 1,089.6 | 1,088.6 | 9  |
| 3  | 370.2   | 185.6 | 353.2   |         | R+1 | 1,007.5 | 504.3 | 990.5   | 989.5   | 8  |
| 4  | 499.3   | 250.1 | 482.3   | 481.3   | E   | 850.4   | 425.7 | 833.4   | 832.4   | 7  |
| 5  | 612.4   | 306.7 | 595.3   | 594.4   | I   | 721.4   | 361.2 | 704.4   | 703.4   | 6  |
| 6  | 683.4   | 342.2 | 666.4   | 665.4   | A   | 608.3   |       | 591.3   | 590.3   | 5  |
| 7  | 811.5   | 406.2 | 794.4   | 793.5   | Q   | 537.3   |       | 520.2   | 519.3   | 4  |
| 8  | 926.5   | 463.8 | 909.5   | 908.5   | D   | 409.2   |       | 392.2   | 391.2   | 3  |
| 9  | 1,073.6 | 537.3 | 1,056.5 | 1,055.6 | F   | 294.2   |       | 277.2   |         | 2  |
| 10 | 1,219.7 | 610.3 | 1,202.6 | 1,201.7 | K   | 147.1   |       | 130.1   |         | 1  |

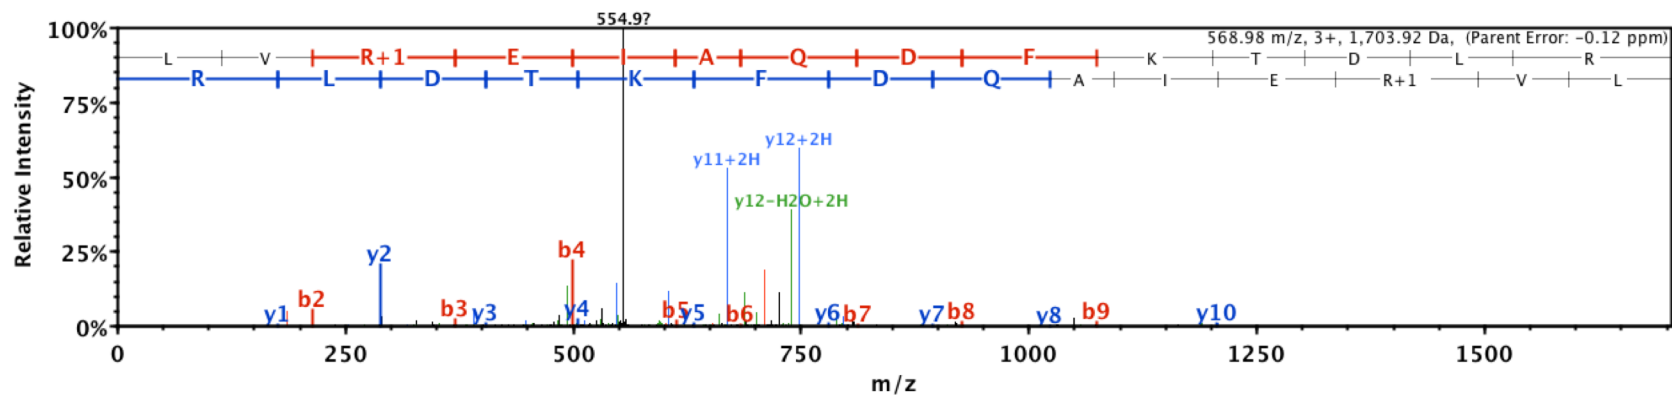

| B  | B Ions  | B+2H  | B-NH3   | B-H2O   | AA  | Y Ions  | Y+2H  | Y-NH3   | Y-H2O   | Y  |
|----|---------|-------|---------|---------|-----|---------|-------|---------|---------|----|
| 1  | 114.1   | 57.5  |         |         | L   | 1,704.9 | 853.0 | 1,687.9 | 1,686.9 | 14 |
| 2  | 213.2   | 107.1 |         |         | V   | 1,591.8 | 796.4 | 1,574.8 | 1,573.8 | 13 |
| 3  | 370.2   | 185.6 | 353.2   |         | R+1 | 1,492.8 | 746.9 | 1,475.7 | 1,474.8 | 12 |
| 4  | 499.3   | 250.1 | 482.3   | 481.3   | E   | 1,335.7 | 668.3 | 1,318.7 | 1,317.7 | 11 |
| 5  | 612.4   | 306.7 | 595.3   | 594.4   | I   | 1,206.6 | 603.8 | 1,189.6 | 1,188.6 | 10 |
| 6  | 683.4   | 342.2 | 666.4   | 665.4   | A   | 1,093.6 | 547.3 | 1,076.5 | 1,075.6 | 9  |
| 7  | 811.5   | 406.2 | 794.4   | 793.5   | Q   | 1,022.5 | 511.8 | 1,005.5 | 1,004.5 | 8  |
| 8  | 926.5   | 463.8 | 909.5   | 908.5   | D   | 894.5   | 447.7 | 877.4   | 876.5   | 7  |
| 9  | 1,073.6 | 537.3 | 1,056.5 | 1,055.6 | F   | 779.4   | 390.2 | 762.4   | 761.4   | 6  |
| 10 | 1,201.7 | 601.3 | 1,184.6 | 1,183.6 | K   | 632.4   | 316.7 | 615.3   | 614.4   | 5  |
| 11 | 1,302.7 | 651.9 | 1,285.7 | 1,284.7 | T   | 504.3   | 252.6 | 487.3   | 486.3   | 4  |
| 12 | 1,417.7 | 709.4 | 1,400.7 | 1,399.7 | D   | 403.2   | 202.1 | 386.2   | 385.2   | 3  |
| 13 | 1,530.8 | 765.9 | 1,513.8 | 1,512.8 | L   | 288.2   | 144.6 | 271.2   |         | 2  |
| 14 | 1,704.9 | 853.0 | 1,687.9 | 1,686.9 | R   | 175.1   | 88.1  | 158.1   |         | 1  |



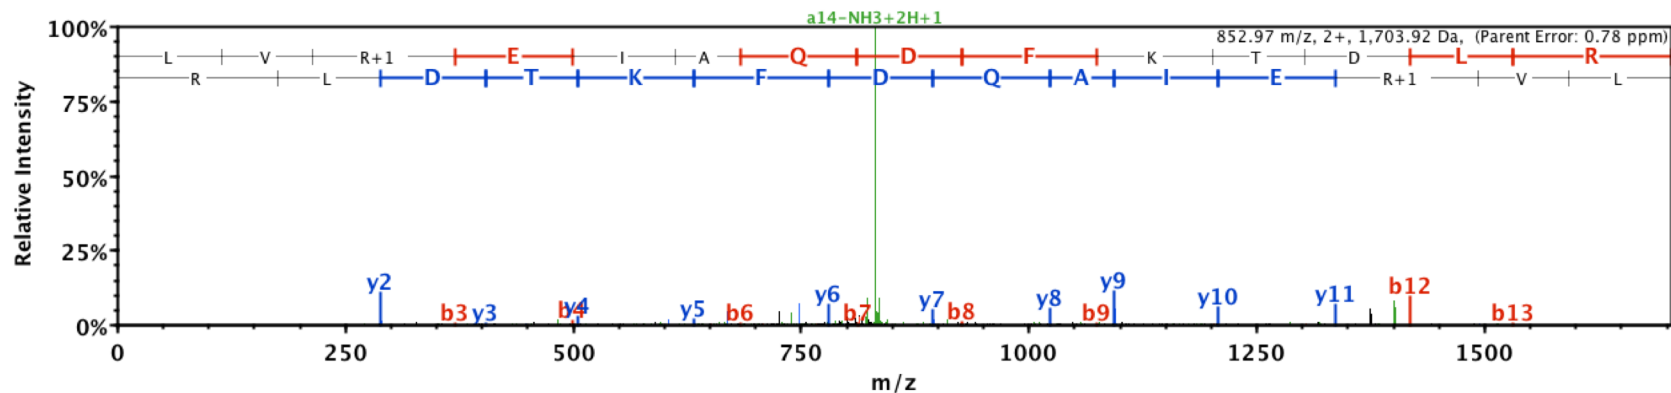

| B  | B ions  | B+2H  | B-NH3   | B-H2O   | AA  | Y ions  | Y+2H  | Y-NH3   | Y-H2O   | Y  |
|----|---------|-------|---------|---------|-----|---------|-------|---------|---------|----|
| 1  | 114.1   |       |         |         | L   | 1,704.9 | 853.0 | 1,687.9 | 1,686.9 | 14 |
| 2  | 213.2   |       |         |         | V   | 1,591.8 | 796.4 | 1,574.8 | 1,573.8 | 13 |
| 3  | 370.2   | 185.6 | 353.2   |         | R+1 | 1,492.8 | 746.9 | 1,475.7 | 1,474.8 | 12 |
| 4  | 499.3   | 250.1 | 482.3   | 481.3   | E   | 1,335.7 | 668.3 | 1,318.7 | 1,317.7 | 11 |
| 5  | 612.4   | 306.7 | 595.3   | 594.4   | I   | 1,206.6 | 603.8 | 1,189.6 | 1,188.6 | 10 |
| 6  | 683.4   | 342.2 | 666.4   | 665.4   | A   | 1,093.6 | 547.3 | 1,076.5 | 1,075.6 | 9  |
| 7  | 811.5   | 406.2 | 794.4   | 793.5   | Q   | 1,022.5 | 511.8 | 1,005.5 | 1,004.5 | 8  |
| 8  | 926.5   | 463.8 | 909.5   | 908.5   | D   | 894.5   | 447.7 | 877.4   | 876.5   | 7  |
| 9  | 1,073.6 | 537.3 | 1,056.5 | 1,055.6 | F   | 779.4   | 390.2 | 762.4   | 761.4   | 6  |
| 10 | 1,201.7 | 601.3 | 1,184.6 | 1,183.6 | K   | 632.4   | 316.7 | 615.3   | 614.4   | 5  |
| 11 | 1,302.7 | 651.9 | 1,285.7 | 1,284.7 | T   | 504.3   |       | 487.3   | 486.3   | 4  |
| 12 | 1,417.7 | 709.4 | 1,400.7 | 1,399.7 | D   | 403.2   |       | 386.2   | 385.2   | 3  |
| 13 | 1,530.8 | 765.9 | 1,513.8 | 1,512.8 | L   | 288.2   |       | 271.2   |         | 2  |
| 14 | 1,704.9 | 853.0 | 1,687.9 | 1,686.9 | R   | 175.1   |       | 158.1   |         | 1  |

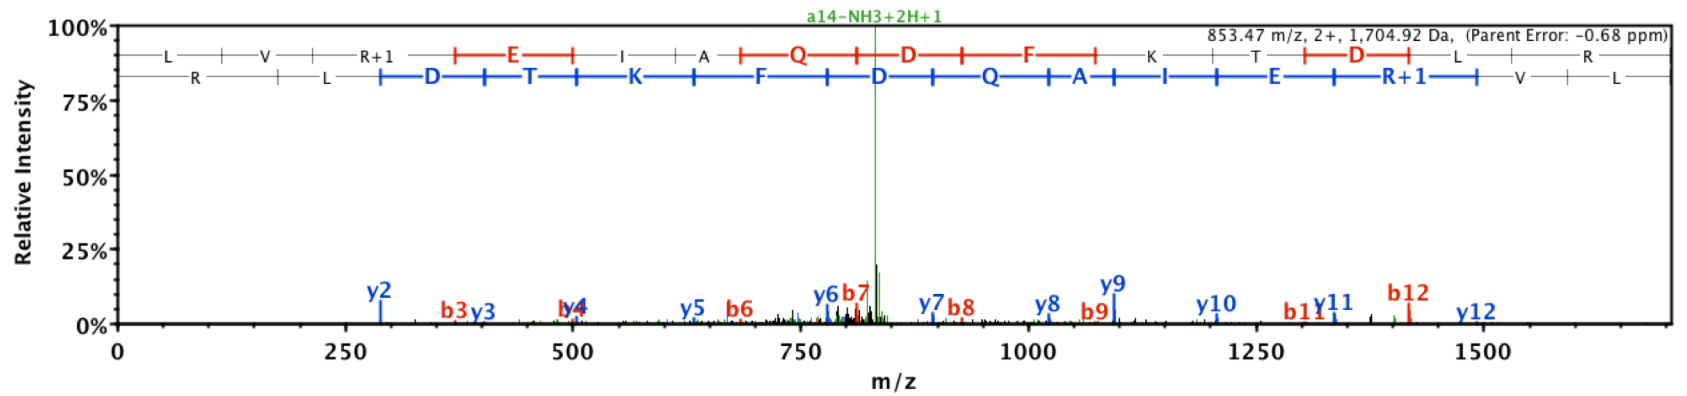

| B  | B Ions  | B+2H  | B-NH3   | B-H2O   | AA  | Y Ions  | Y+2H  | Y-NH3   | Y-H2O   | Y  |
|----|---------|-------|---------|---------|-----|---------|-------|---------|---------|----|
| 1  | 114.1   |       |         |         | L   | 1,704.9 | 853.0 | 1,687.9 | 1,686.9 | 14 |
| 2  | 213.2   |       |         |         | V   | 1,591.8 | 796.4 | 1,574.8 | 1,573.8 | 13 |
| 3  | 370.2   | 185.6 | 353.2   |         | R+1 | 1,492.8 | 746.9 | 1,475.7 | 1,474.8 | 12 |
| 4  | 499.3   | 250.1 | 482.3   | 481.3   | E   | 1,335.7 | 668.3 | 1,318.7 | 1,317.7 | 11 |
| 5  | 612.4   | 306.7 | 595.3   | 594.4   | I   | 1,206.6 | 603.8 | 1,189.6 | 1,188.6 | 10 |
| 6  | 683.4   | 342.2 | 666.4   | 665.4   | A   | 1,093.6 | 547.3 | 1,076.5 | 1,075.6 | 9  |
| 7  | 811.5   | 406.2 | 794.4   | 793.5   | Q   | 1,022.5 | 511.8 | 1,005.5 | 1,004.5 | 8  |
| 8  | 926.5   | 463.8 | 909.5   | 908.5   | D   | 894.5   | 447.7 | 877.4   | 876.5   | 7  |
| 9  | 1,073.6 | 537.3 | 1,056.5 | 1,055.6 | F   | 779.4   | 390.2 | 762.4   | 761.4   | 6  |
| 10 | 1,201.7 | 601.3 | 1,184.6 | 1,183.6 | K   | 632.4   | 316.7 | 615.3   | 614.4   | 5  |
| 11 | 1,302.7 | 651.9 | 1,285.7 | 1,284.7 | T   | 504.3   |       | 487.3   | 486.3   | 4  |
| 12 | 1,417.7 | 709.4 | 1,400.7 | 1,399.7 | D   | 403.2   |       | 386.2   | 385.2   | 3  |
| 13 | 1,530.8 | 765.9 | 1,513.8 | 1,512.8 | L   | 288.2   |       | 271.2   |         | 2  |
| 14 | 1,704.9 | 853.0 | 1,687.9 | 1,686.9 | R   | 175.1   |       | 158.1   |         | 1  |

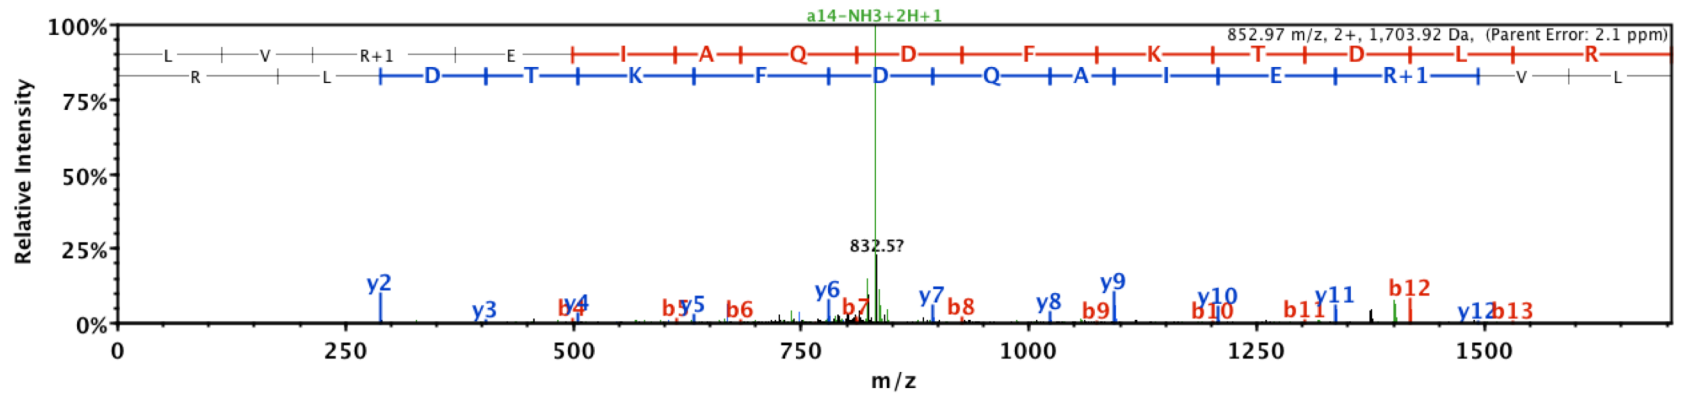

| B  | B Ions  | B+2H  | B-NH3   | B-H2O   | AA  | Y Ions  | Y+2H  | Y-NH3   | Y-H2O   | Y  |
|----|---------|-------|---------|---------|-----|---------|-------|---------|---------|----|
| 1  | 114.1   |       |         |         | L   | 1,704.9 | 853.0 | 1,687.9 | 1,686.9 | 14 |
| 2  | 213.2   |       |         |         | V   | 1,591.8 | 796.4 | 1,574.8 | 1,573.8 | 13 |
| 3  | 370.2   | 185.6 | 353.2   |         | R+1 | 1,492.8 | 746.9 | 1,475.7 | 1,474.8 | 12 |
| 4  | 499.3   | 250.1 | 482.3   | 481.3   | E   | 1,335.7 | 668.3 | 1,318.7 | 1,317.7 | 11 |
| 5  | 612.4   | 306.7 | 595.3   | 594.4   | I   | 1,206.6 | 603.8 | 1,189.6 | 1,188.6 | 10 |
| 6  | 683.4   | 342.2 | 666.4   | 665.4   | A   | 1,093.6 | 547.3 | 1,076.5 | 1,075.6 | 9  |
| 7  | 811.5   | 406.2 | 794.4   | 793.5   | Q   | 1,022.5 | 511.8 | 1,005.5 | 1,004.5 | 8  |
| 8  | 926.5   | 463.8 | 909.5   | 908.5   | D   | 894.5   | 447.7 | 877.4   | 876.5   | 7  |
| 9  | 1,073.6 | 537.3 | 1,056.5 | 1,055.6 | F   | 779.4   | 390.2 | 762.4   | 761.4   | 6  |
| 10 | 1,201.7 | 601.3 | 1,184.6 | 1,183.6 | K   | 632.4   | 316.7 | 615.3   | 614.4   | 5  |
| 11 | 1,302.7 | 651.9 | 1,285.7 | 1,284.7 | T   | 504.3   |       | 487.3   | 486.3   | 4  |
| 12 | 1,417.7 | 709.4 | 1,400.7 | 1,399.7 | D   | 403.2   |       | 386.2   | 385.2   | 3  |
| 13 | 1,530.8 | 765.9 | 1,513.8 | 1,512.8 | L   | 288.2   |       | 271.2   |         | 2  |
| 14 | 1,704.9 | 853.0 | 1,687.9 | 1,686.9 | R   | 175.1   |       | 158.1   |         | 1  |

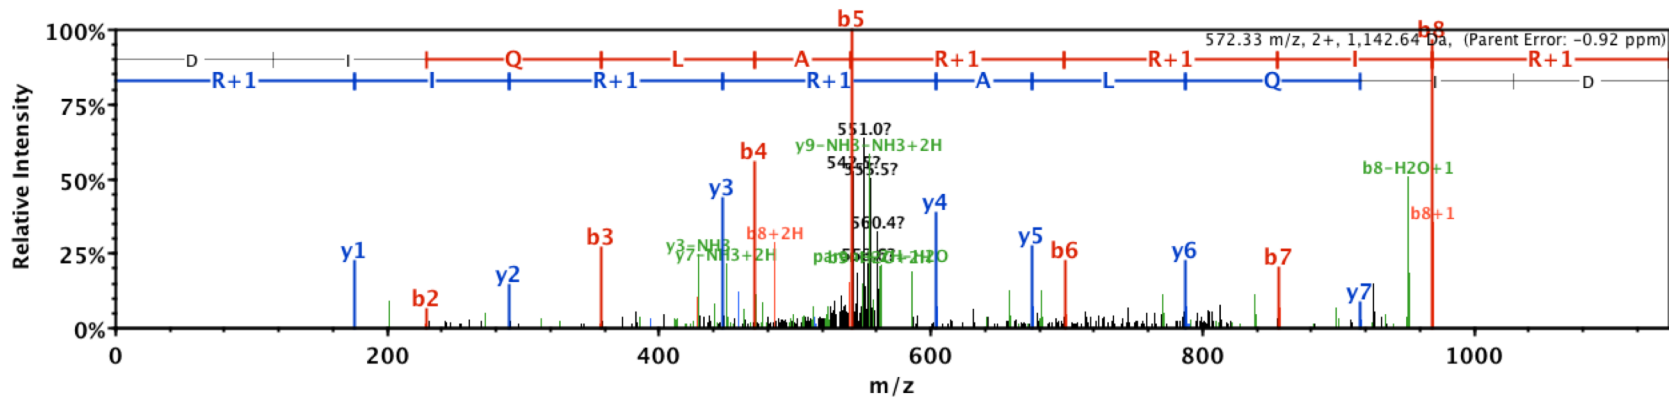

| B | B Ions  | B+2H  | B-NH3   | B-H2O   | AA  | Y Ions  | Y+2H  | Y-NH3   | Y-H2O   | Y |
|---|---------|-------|---------|---------|-----|---------|-------|---------|---------|---|
| 1 | 116.0   |       |         | 98.0    | D   | 1,143.6 | 572.3 | 1,126.6 | 1,125.6 | 9 |
| 2 | 229.1   |       |         | 211.1   | I   | 1,028.6 | 514.8 | 1,011.6 |         | 8 |
| 3 | 357.2   |       | 340.2   | 339.2   | Q   | 915.5   | 458.3 | 898.5   |         | 7 |
| 4 | 470.3   |       | 453.2   | 452.3   | L   | 787.5   | 394.2 | 770.5   |         | 6 |
| 5 | 541.3   |       | 524.3   | 523.3   | A   | 674.4   | 337.7 | 657.4   |         | 5 |
| 6 | 698.4   | 349.7 | 681.4   | 680.4   | R+1 | 603.4   | 302.2 | 586.3   |         | 4 |
| 7 | 855.5   | 428.2 | 838.4   | 837.5   | R+1 | 446.3   | 223.6 | 429.2   |         | 3 |
| 8 | 968.6   | 484.8 | 951.5   | 950.5   | I   | 289.2   |       | 272.2   |         | 2 |
| 9 | 1,143.6 | 572.3 | 1,126.6 | 1,125.6 | R+1 | 176.1   |       | 159.1   |         | 1 |

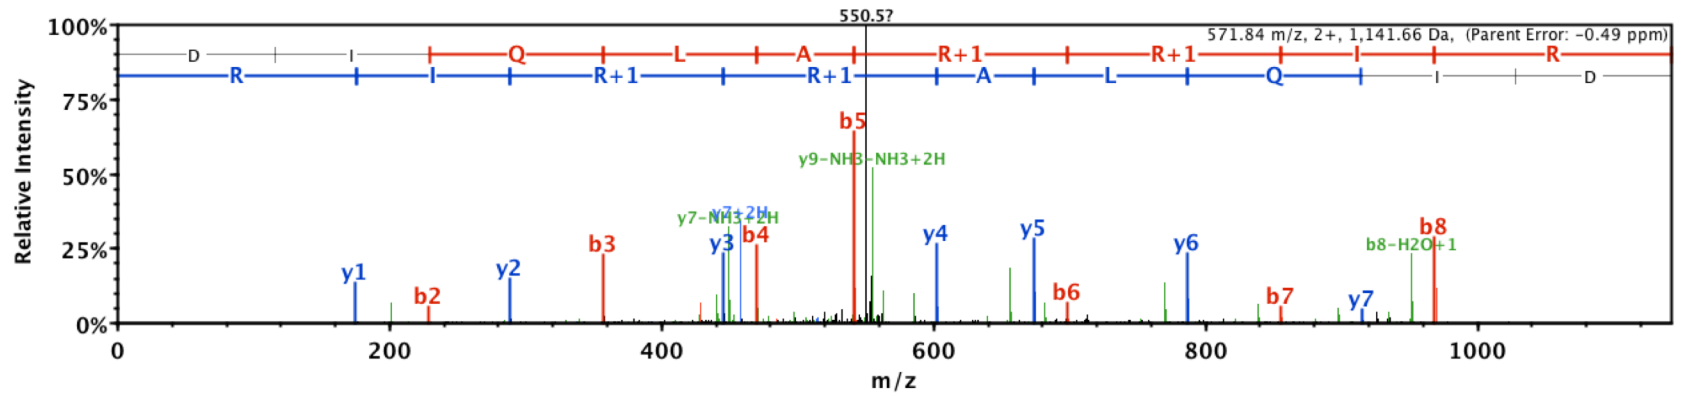

| B | B Ions  | B+2H  | B-NH3   | B-H2O   | AA  | Y Ions  | Y+2H  | Y-NH3   | Y-H2O   | Y |
|---|---------|-------|---------|---------|-----|---------|-------|---------|---------|---|
| 1 | 116.0   |       |         | 98.0    | D   | 1,142.7 | 571.8 | 1,125.6 | 1,124.7 | 9 |
| 2 | 229.1   |       |         | 211.1   | I   | 1,027.6 | 514.3 | 1,010.6 |         | 8 |
| 3 | 357.2   |       | 340.2   | 339.2   | Q   | 914.6   | 457.8 | 897.5   |         | 7 |
| 4 | 470.3   |       | 453.2   | 452.3   | L   | 786.5   | 393.8 | 769.5   |         | 6 |
| 5 | 541.3   |       | 524.3   | 523.3   | A   | 673.4   | 337.2 | 656.4   |         | 5 |
| 6 | 698.4   | 349.7 | 681.4   | 680.4   | R+1 | 602.4   | 301.7 | 585.3   |         | 4 |
| 7 | 855.5   | 428.2 | 838.4   | 837.5   | R+1 | 445.3   | 223.1 | 428.3   |         | 3 |
| 8 | 968.6   | 484.8 | 951.5   | 950.5   | I   | 288.2   |       | 271.2   |         | 2 |
| 9 | 1,142.7 | 571.8 | 1,125.6 | 1,124.7 | R   | 175.1   |       | 158.1   |         | 1 |

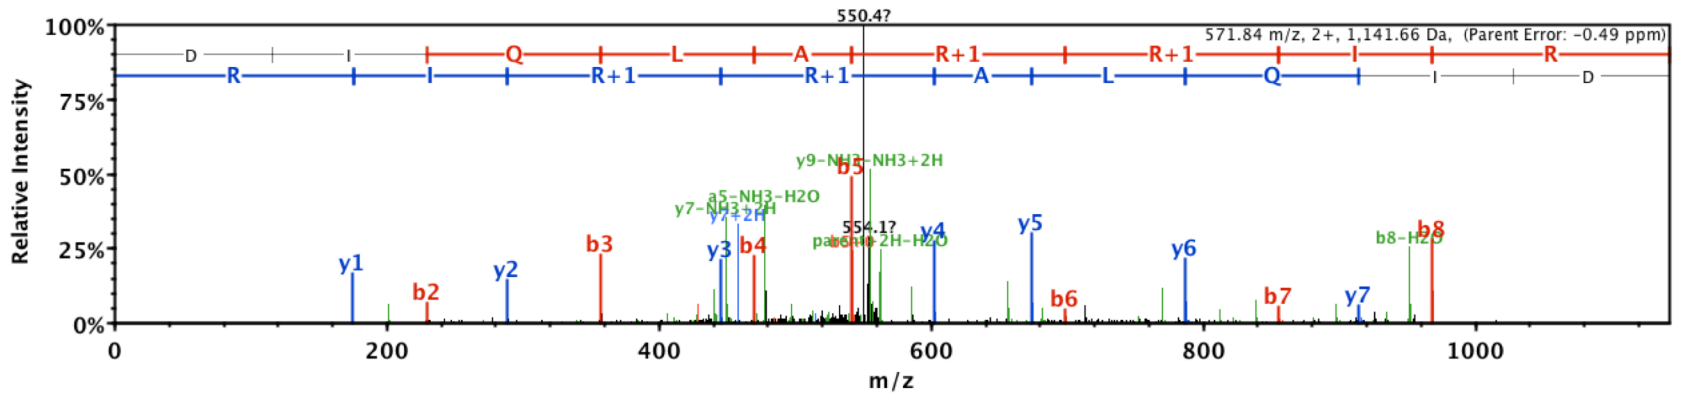

| B | B Ions  | B+2H  | B-NH3   | B-H2O   | AA  | Y Ions  | Y+2H  | Y-NH3   | Y-H2O   | Y |
|---|---------|-------|---------|---------|-----|---------|-------|---------|---------|---|
| 1 | 116.0   |       |         | 98.0    | D   | 1,142.7 | 571.8 | 1,125.6 | 1,124.7 | 9 |
| 2 | 229.1   |       |         | 211.1   | I   | 1,027.6 | 514.3 | 1,010.6 |         | 8 |
| 3 | 357.2   |       | 340.2   | 339.2   | Q   | 914.6   | 457.8 | 897.5   |         | 7 |
| 4 | 470.3   |       | 453.2   | 452.3   | L   | 786.5   | 393.8 | 769.5   |         | 6 |
| 5 | 541.3   |       | 524.3   | 523.3   | A   | 673.4   | 337.2 | 656.4   |         | 5 |
| 6 | 698.4   | 349.7 | 681.4   | 680.4   | R+1 | 602.4   | 301.7 | 585.3   |         | 4 |
| 7 | 855.5   | 428.2 | 838.4   | 837.5   | R+1 | 445.3   | 223.1 | 428.3   |         | 3 |
| 8 | 968.6   | 484.8 | 951.5   | 950.5   | I   | 288.2   |       | 271.2   |         | 2 |
| 9 | 1,142.7 | 571.8 | 1,125.6 | 1,124.7 | R   | 175.1   |       | 158.1   |         | 1 |

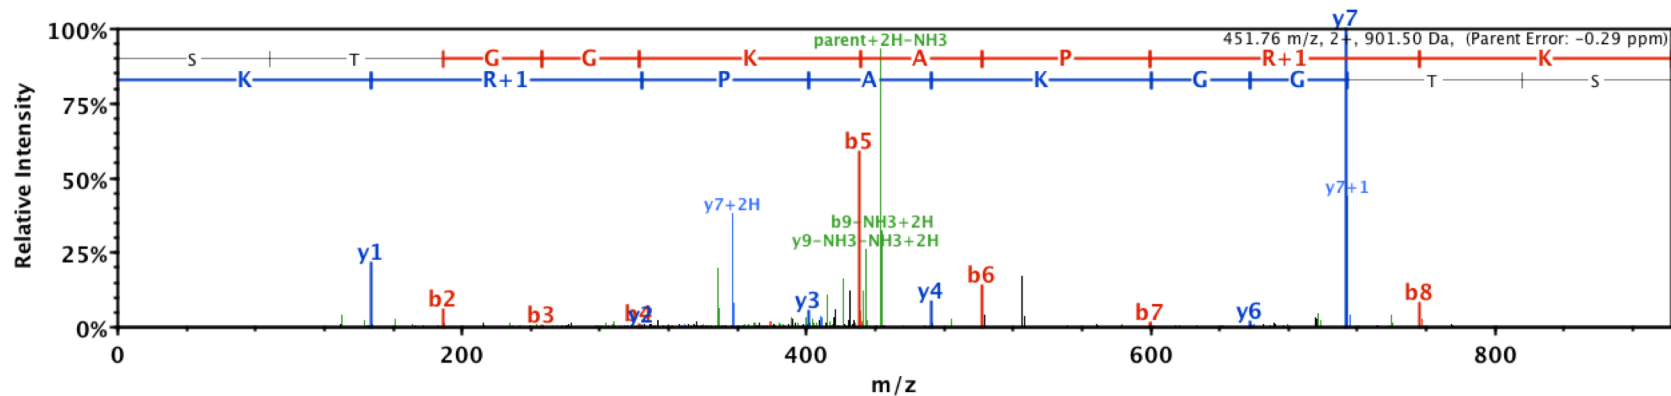

| B | B Ions | B+2H  | B-NH3 | B-H2O | AA  | Y Ions | Y+2H  | Y-NH3 | Y-H2O | Y |
|---|--------|-------|-------|-------|-----|--------|-------|-------|-------|---|
| 1 | 88.0   |       |       | 70.0  | S   | 902.5  | 451.8 | 885.5 | 884.5 | 9 |
| 2 | 189.1  |       |       | 171.1 | T   | 815.5  | 408.2 | 798.4 | 797.5 | 8 |
| 3 | 246.1  |       |       | 228.1 | G   | 714.4  | 357.7 | 697.4 |       | 7 |
| 4 | 303.1  |       |       | 285.1 | G   | 657.4  | 329.2 | 640.4 |       | 6 |
| 5 | 431.2  | 216.1 | 414.2 | 413.2 | K   | 600.4  | 300.7 | 583.4 |       | 5 |
| 6 | 502.3  | 251.6 | 485.2 | 484.3 | A   | 472.3  | 236.6 | 455.3 |       | 4 |
| 7 | 599.3  | 300.2 | 582.3 | 581.3 | P   | 401.3  | 201.1 | 384.2 |       | 3 |
| 8 | 756.4  | 378.7 | 739.4 | 738.4 | R+1 | 304.2  | 152.6 | 287.2 |       | 2 |
| 9 | 902.5  | 451.8 | 885.5 | 884.5 | K   | 147.1  |       | 130.1 |       | 1 |

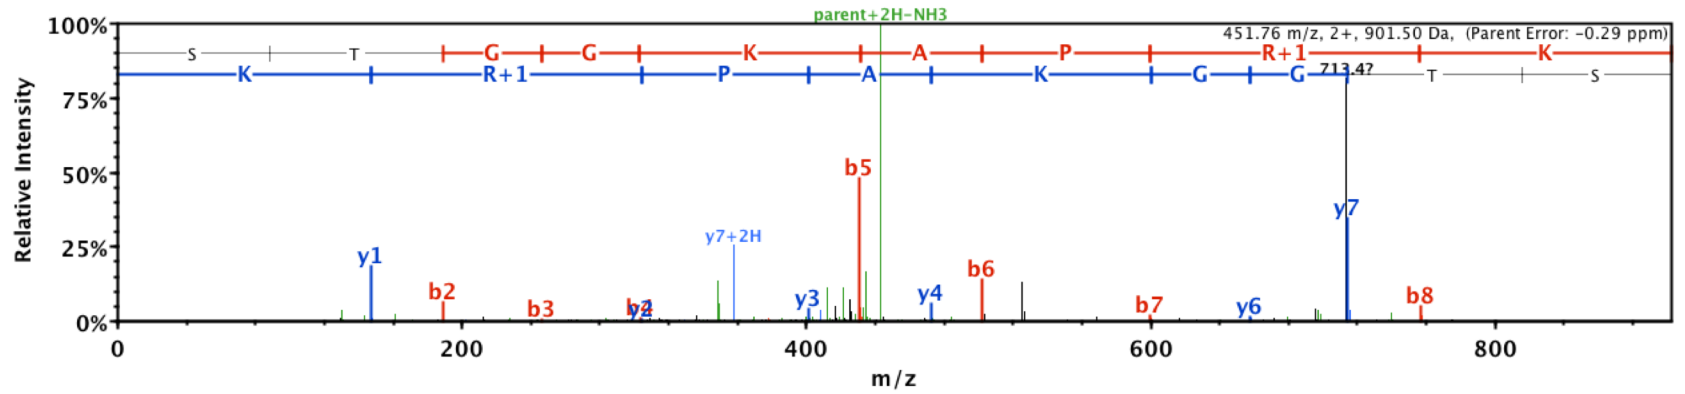

| B | B Ions | B+2H  | B-NH3 | B-H2O | AA  | Y Ions | Y+2H  | Y-NH3 | Y-H2O | Y |
|---|--------|-------|-------|-------|-----|--------|-------|-------|-------|---|
| 1 | 88.0   |       |       | 70.0  | S   | 902.5  | 451.8 | 885.5 | 884.5 | 9 |
| 2 | 189.1  |       |       | 171.1 | T   | 815.5  | 408.2 | 798.4 | 797.5 | 8 |
| 3 | 246.1  |       |       | 228.1 | G   | 714.4  | 357.7 | 697.4 |       | 7 |
| 4 | 303.1  |       |       | 285.1 | G   | 657.4  | 329.2 | 640.4 |       | 6 |
| 5 | 431.2  | 216.1 | 414.2 | 413.2 | K   | 600.4  | 300.7 | 583.4 |       | 5 |
| 6 | 502.3  | 251.6 | 485.2 | 484.3 | A   | 472.3  | 236.6 | 455.3 |       | 4 |
| 7 | 599.3  | 300.2 | 582.3 | 581.3 | P   | 401.3  | 201.1 | 384.2 |       | 3 |
| 8 | 756.4  | 378.7 | 739.4 | 738.4 | R+1 | 304.2  | 152.6 | 287.2 |       | 2 |
| 9 | 902.5  | 451.8 | 885.5 | 884.5 | K   | 147.1  |       | 130.1 |       | 1 |



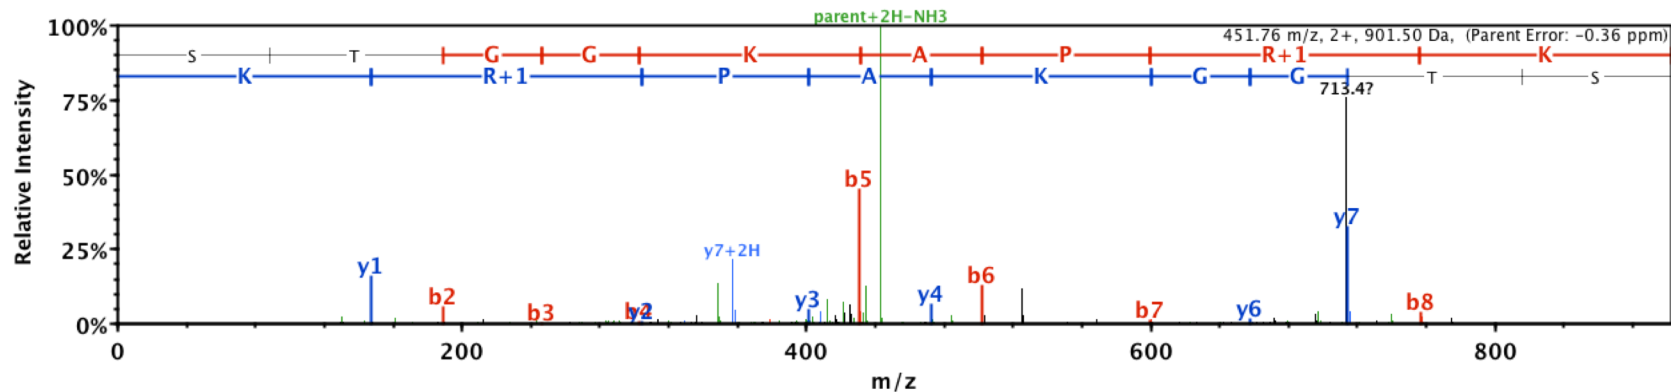

| B | B Ions | B+2H  | B-NH3 | B-H2O | AA  | Y Ions | Y+2H  | Y-NH3 | Y-H2O | Y |
|---|--------|-------|-------|-------|-----|--------|-------|-------|-------|---|
| 1 | 88.0   |       |       | 70.0  | S   | 902.5  | 451.8 | 885.5 | 884.5 | 9 |
| 2 | 189.1  |       |       | 171.1 | T   | 815.5  | 408.2 | 798.4 | 797.5 | 8 |
| 3 | 246.1  |       |       | 228.1 | G   | 714.4  | 357.7 | 697.4 |       | 7 |
| 4 | 303.1  |       |       | 285.1 | G   | 657.4  | 329.2 | 640.4 |       | 6 |
| 5 | 431.2  | 216.1 | 414.2 | 413.2 | K   | 600.4  | 300.7 | 583.4 |       | 5 |
| 6 | 502.3  | 251.6 | 485.2 | 484.3 | A   | 472.3  | 236.6 | 455.3 |       | 4 |
| 7 | 599.3  | 300.2 | 582.3 | 581.3 | P   | 401.3  | 201.1 | 384.2 |       | 3 |
| 8 | 756.4  | 378.7 | 739.4 | 738.4 | R+1 | 304.2  | 152.6 | 287.2 |       | 2 |
| 9 | 902.5  | 451.8 | 885.5 | 884.5 | K   | 147.1  |       | 130.1 |       | 1 |

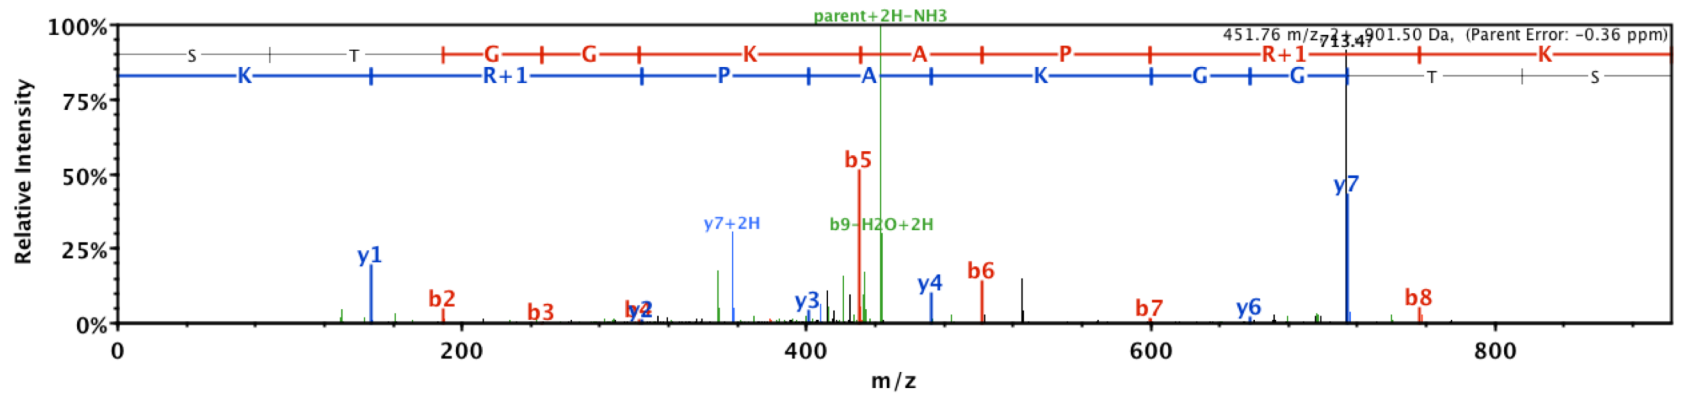

| B | B Ions | B+2H  | B-NH3 | B-H2O | AA  | Y Ions | Y+2H  | Y-NH3 | Y-H2O | Y |
|---|--------|-------|-------|-------|-----|--------|-------|-------|-------|---|
| 1 | 88.0   |       |       | 70.0  | S   | 902.5  | 451.8 | 885.5 | 884.5 | 9 |
| 2 | 189.1  |       |       | 171.1 | T   | 815.5  | 408.2 | 798.4 | 797.5 | 8 |
| 3 | 246.1  |       |       | 228.1 | G   | 714.4  | 357.7 | 697.4 |       | 7 |
| 4 | 303.1  |       |       | 285.1 | G   | 657.4  | 329.2 | 640.4 |       | 6 |
| 5 | 431.2  | 216.1 | 414.2 | 413.2 | K   | 600.4  | 300.7 | 583.4 |       | 5 |
| 6 | 502.3  | 251.6 | 485.2 | 484.3 | A   | 472.3  | 236.6 | 455.3 |       | 4 |
| 7 | 599.3  | 300.2 | 582.3 | 581.3 | P   | 401.3  | 201.1 | 384.2 |       | 3 |
| 8 | 756.4  | 378.7 | 739.4 | 738.4 | R+1 | 304.2  | 152.6 | 287.2 |       | 2 |
| 9 | 902.5  | 451.8 | 885.5 | 884.5 | K   | 147.1  |       | 130.1 |       | 1 |

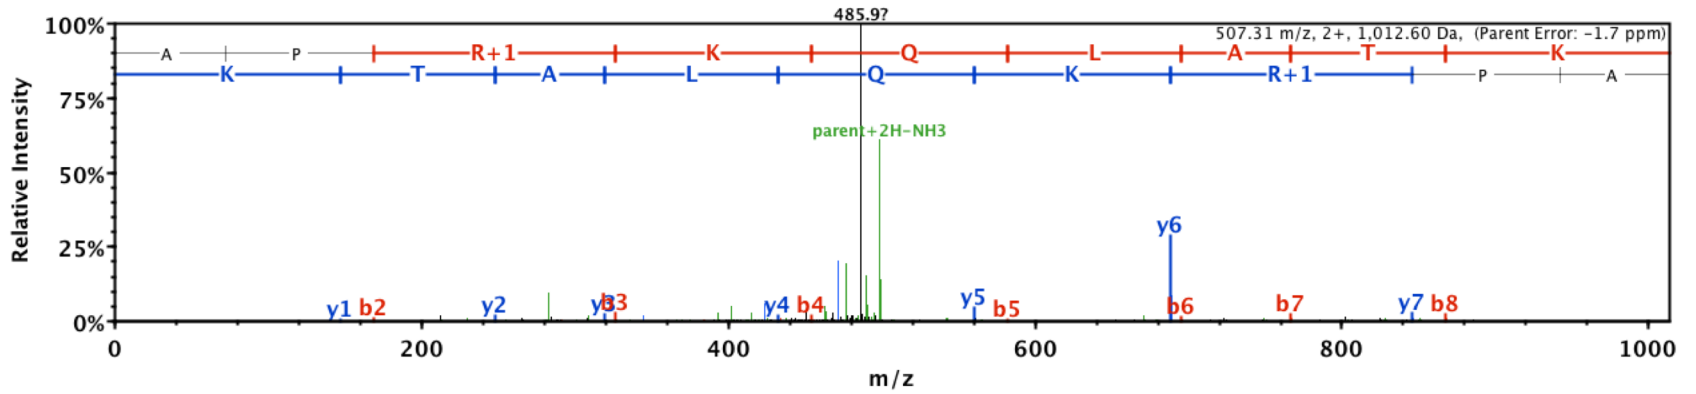

| B | B Ions  | B+2H  | B-NH3 | B-H2O | AA  | Y Ions  | Y+2H  | Y-NH3 | Y-H2O | Y |
|---|---------|-------|-------|-------|-----|---------|-------|-------|-------|---|
| 1 | 72.0    |       |       |       | A   | 1,013.6 | 507.3 | 996.6 | 995.6 | 9 |
| 2 | 169.1   |       |       |       | P   | 942.6   | 471.8 | 925.5 | 924.6 | 8 |
| 3 | 326.2   | 163.6 | 309.2 |       | R+1 | 845.5   | 423.3 | 828.5 | 827.5 | 7 |
| 4 | 454.3   | 227.6 | 437.3 |       | K   | 688.4   | 344.7 | 671.4 | 670.4 | 6 |
| 5 | 582.3   | 291.7 | 565.3 |       | Q   | 560.3   |       | 543.3 | 542.3 | 5 |
| 6 | 695.4   | 348.2 | 678.4 |       | L   | 432.3   |       | 415.3 | 414.3 | 4 |
| 7 | 766.5   | 383.7 | 749.4 |       | A   | 319.2   |       | 302.2 | 301.2 | 3 |
| 8 | 867.5   | 434.3 | 850.5 | 849.5 | T   | 248.2   |       | 231.1 | 230.1 | 2 |
| 9 | 1,013.6 | 507.3 | 996.6 | 995.6 | K   | 147.1   |       | 130.1 |       | 1 |

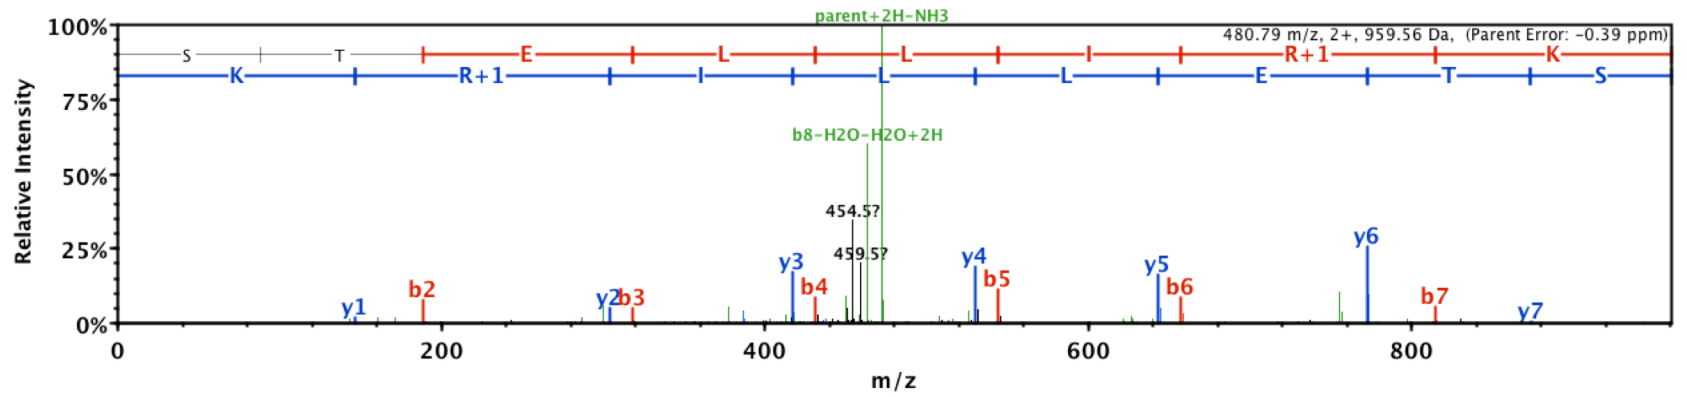

| B | B Ions | B+2H  | B-NH3 | B-H2O | AA  | Y Ions | Y+2H  | Y-NH3 | Y-H2O | Y |
|---|--------|-------|-------|-------|-----|--------|-------|-------|-------|---|
| 1 | 88.0   |       |       | 70.0  | S   | 960.6  | 480.8 | 943.5 | 942.6 | 8 |
| 2 | 189.1  |       |       | 171.1 | T   | 873.5  | 437.3 | 856.5 | 855.5 | 7 |
| 3 | 318.1  |       |       | 300.1 | E   | 772.5  | 386.8 | 755.5 | 754.5 | 6 |
| 4 | 431.2  |       |       | 413.2 | L   | 643.5  | 322.2 | 626.4 |       | 5 |
| 5 | 544.3  |       |       | 526.3 | L   | 530.4  | 265.7 | 513.3 |       | 4 |
| 6 | 657.4  | 329.2 |       | 639.4 | I   | 417.3  | 209.1 | 400.3 |       | 3 |
| 7 | 814.5  | 407.7 | 797.4 | 796.5 | R+1 | 304.2  | 152.6 | 287.2 |       | 2 |
| 8 | 960.6  | 480.8 | 943.5 | 942.6 | K   | 147.1  |       | 130.1 |       | 1 |

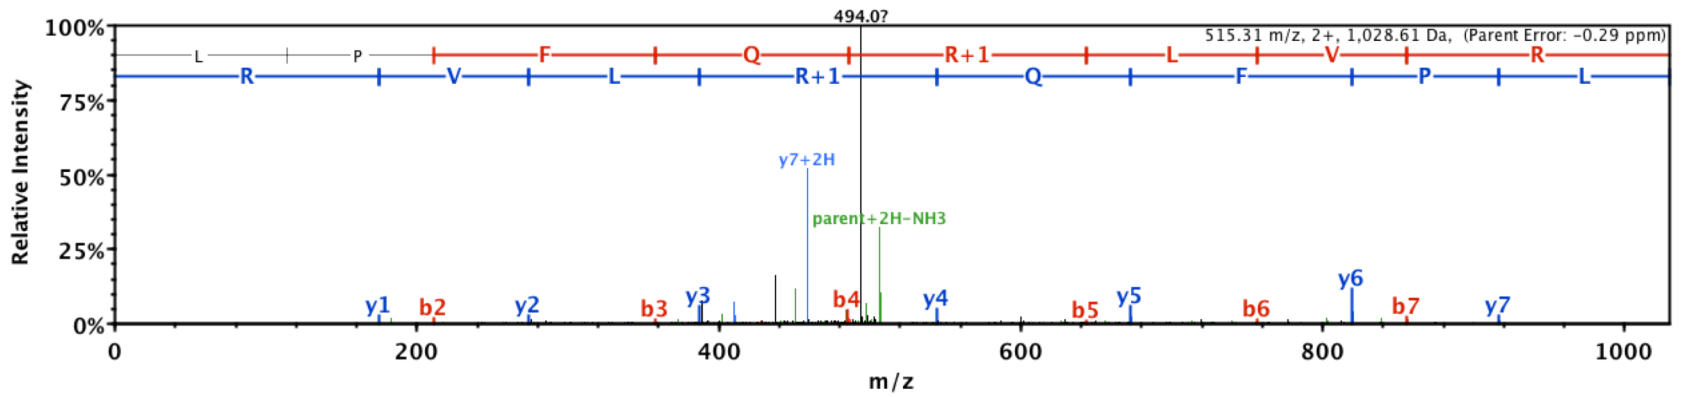

| B | B Ions  | B+2H  | B-NH3   | B-H2O | AA  | Y Ions  | Y+2H  | Y-NH3   | Y-H2O | Y |
|---|---------|-------|---------|-------|-----|---------|-------|---------|-------|---|
| 1 | 114.1   |       |         |       | L   | 1,029.6 | 515.3 | 1,012.6 |       | 8 |
| 2 | 211.1   |       |         |       | P   | 916.5   | 458.8 | 899.5   |       | 7 |
| 3 | 358.2   |       |         |       | F   | 819.5   | 410.2 | 802.5   |       | 6 |
| 4 | 486.3   |       | 469.2   |       | Q   | 672.4   | 336.7 | 655.4   |       | 5 |
| 5 | 643.4   | 322.2 | 626.3   |       | R+1 | 544.4   | 272.7 | 527.3   |       | 4 |
| 6 | 756.4   | 378.7 | 739.4   |       | L   | 387.3   |       | 370.2   |       | 3 |
| 7 | 855.5   | 428.3 | 838.5   |       | V   | 274.2   |       | 257.2   |       | 2 |
| 8 | 1,029.6 | 515.3 | 1,012.6 |       | R   | 175.1   |       | 158.1   |       | 1 |

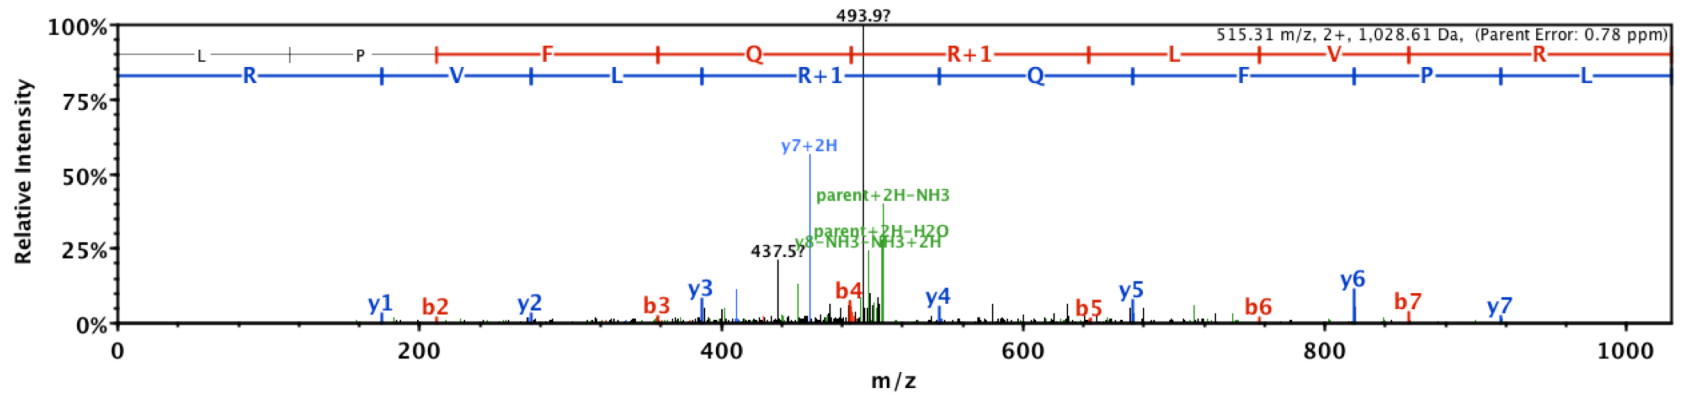

| B | B Ions  | B+2H  | B-NH3   | B-H2O | AA  | Y Ions  | Y+2H  | Y-NH3   | Y-H2O | Y |
|---|---------|-------|---------|-------|-----|---------|-------|---------|-------|---|
| 1 | 114.1   |       |         |       | L   | 1,029.6 | 515.3 | 1,012.6 |       | 8 |
| 2 | 211.1   |       |         |       | P   | 916.5   | 458.8 | 899.5   |       | 7 |
| 3 | 358.2   |       |         |       | F   | 819.5   | 410.2 | 802.5   |       | 6 |
| 4 | 486.3   |       | 469.2   |       | Q   | 672.4   | 336.7 | 655.4   |       | 5 |
| 5 | 643.4   | 322.2 | 626.3   |       | R+1 | 544.4   | 272.7 | 527.3   |       | 4 |
| 6 | 756.4   | 378.7 | 739.4   |       | L   | 387.3   |       | 370.2   |       | 3 |
| 7 | 855.5   | 428.3 | 838.5   |       | V   | 274.2   |       | 257.2   |       | 2 |
| 8 | 1,029.6 | 515.3 | 1,012.6 |       | R   | 175.1   |       | 158.1   |       | 1 |

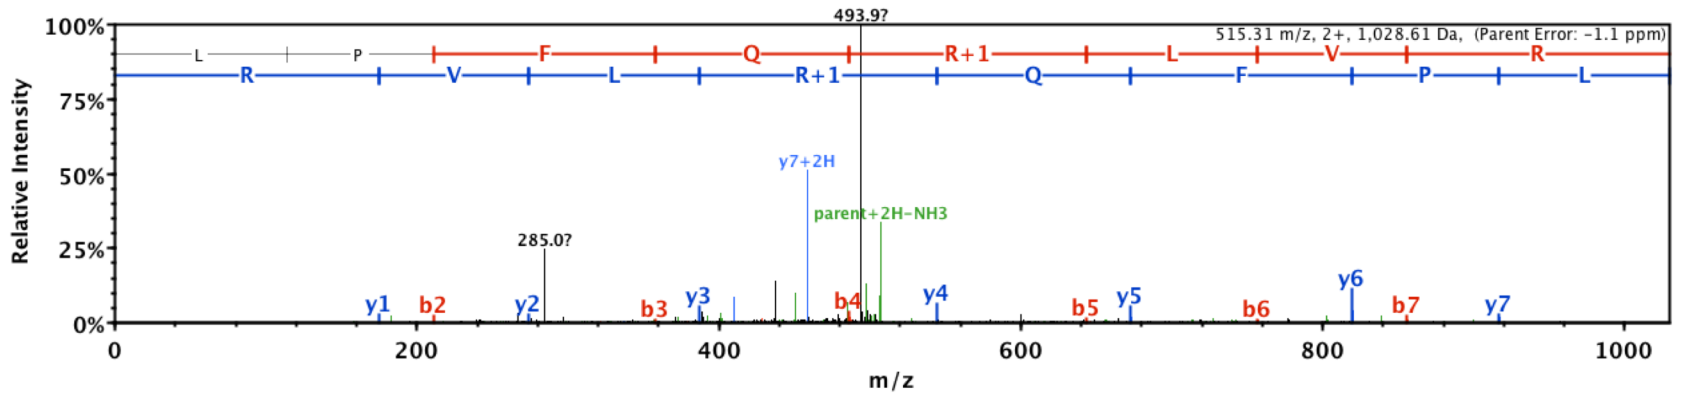

| B | B Ions  | B+2H  | B-NH3   | B-H2O | AA  | Y Ions  | Y+2H  | Y-NH3   | Y-H2O | Y |
|---|---------|-------|---------|-------|-----|---------|-------|---------|-------|---|
| 1 | 114.1   |       |         |       | L   | 1,029.6 | 515.3 | 1,012.6 |       | 8 |
| 2 | 211.1   |       |         |       | P   | 916.5   | 458.8 | 899.5   |       | 7 |
| 3 | 358.2   |       |         |       | F   | 819.5   | 410.2 | 802.5   |       | 6 |
| 4 | 486.3   |       | 469.2   |       | Q   | 672.4   | 336.7 | 655.4   |       | 5 |
| 5 | 643.4   | 322.2 | 626.3   |       | R+1 | 544.4   | 272.7 | 527.3   |       | 4 |
| 6 | 756.4   | 378.7 | 739.4   |       | L   | 387.3   |       | 370.2   |       | 3 |
| 7 | 855.5   | 428.3 | 838.5   |       | V   | 274.2   |       | 257.2   |       | 2 |
| 8 | 1,029.6 | 515.3 | 1,012.6 |       | R   | 175.1   |       | 158.1   |       | 1 |

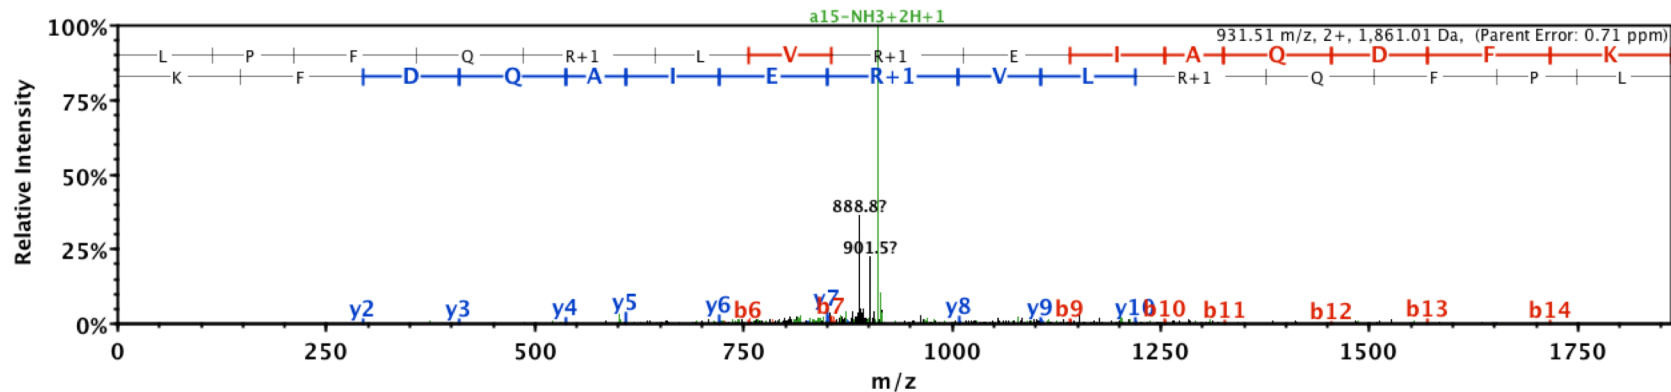

| B  | B Ions  | B+2H  | B-NH3   | B-H2O   | AA  | Y Ions  | Y+2H  | Y-NH3   | Y-H2O   | Y  |
|----|---------|-------|---------|---------|-----|---------|-------|---------|---------|----|
| 1  | 114.1   |       |         |         | L   | 1,862.0 | 931.5 | 1,845.0 | 1,844.0 | 15 |
| 2  | 211.1   |       |         |         | P   | 1,748.9 | 875.0 | 1,731.9 | 1,730.9 | 14 |
| 3  | 358.2   |       |         |         | F   | 1,651.9 | 826.4 | 1,634.9 | 1,633.9 | 13 |
| 4  | 486.3   |       | 469.2   |         | Q   | 1,504.8 | 752.9 | 1,487.8 | 1,486.8 | 12 |
| 5  | 643.4   | 322.2 | 626.3   |         | R+1 | 1,376.8 | 688.9 | 1,359.7 | 1,358.7 | 11 |
| 6  | 756.4   | 378.7 | 739.4   |         | L   | 1,219.7 | 610.3 | 1,202.6 | 1,201.7 | 10 |
| 7  | 855.5   | 428.3 | 838.5   |         | V   | 1,106.6 | 553.8 | 1,089.6 | 1,088.6 | 9  |
| 8  | 1,012.6 | 506.8 | 995.6   |         | R+1 | 1,007.5 | 504.3 | 990.5   | 989.5   | 8  |
| 9  | 1,141.6 | 571.3 | 1,124.6 | 1,123.6 | E   | 850.4   | 425.7 | 833.4   | 832.4   | 7  |
| 10 | 1,254.7 | 627.9 | 1,237.7 | 1,236.7 | I   | 721.4   | 361.2 | 704.4   | 703.4   | 6  |
| 11 | 1,325.8 | 663.4 | 1,308.7 | 1,307.7 | A   | 608.3   |       | 591.3   | 590.3   | 5  |
| 12 | 1,453.8 | 727.4 | 1,436.8 | 1,435.8 | Q   | 537.3   |       | 520.2   | 519.3   | 4  |
| 13 | 1,568.8 | 784.9 | 1,551.8 | 1,550.8 | D   | 409.2   |       | 392.2   | 391.2   | 3  |
| 14 | 1,715.9 | 858.5 | 1,698.9 | 1,697.9 | F   | 294.2   |       | 277.2   |         | 2  |
| 15 | 1,862.0 | 931.5 | 1,845.0 | 1,844.0 | K   | 147.1   |       | 130.1   |         | 1  |



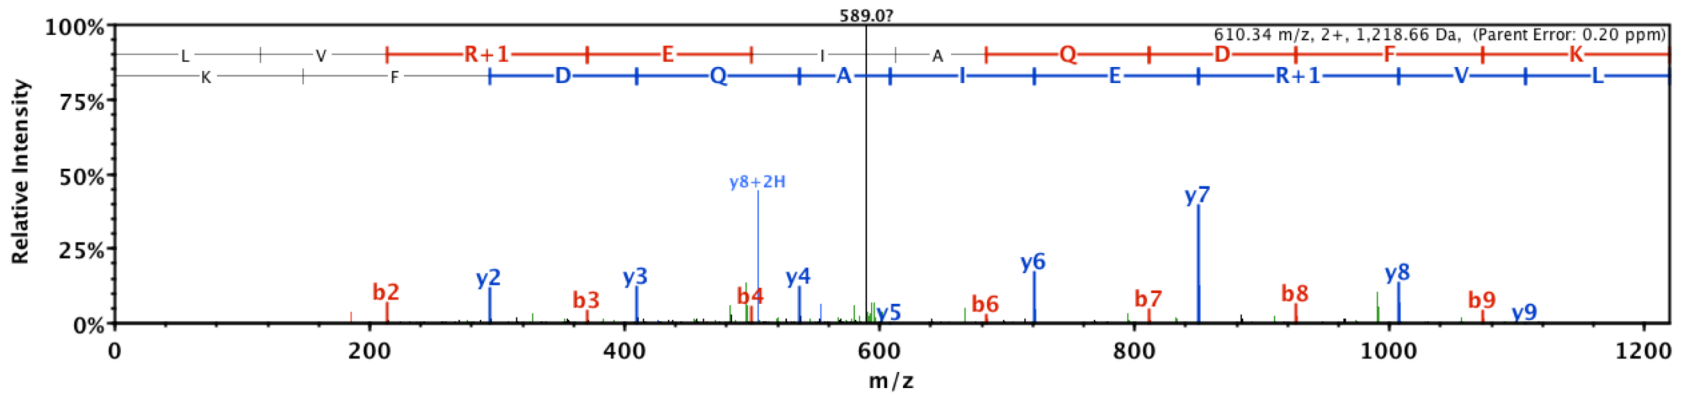

| B  | B Ions  | B+2H  | B-NH3   | B-H2O   | AA  | Y Ions  | Y+2H  | Y-NH3   | Y-H2O   | Y  |
|----|---------|-------|---------|---------|-----|---------|-------|---------|---------|----|
| 1  | 114.1   |       |         |         | L   | 1,219.7 | 610.3 | 1,202.6 | 1,201.7 | 10 |
| 2  | 213.2   |       |         |         | V   | 1,106.6 | 553.8 | 1,089.6 | 1,088.6 | 9  |
| 3  | 370.2   | 185.6 | 353.2   |         | R+1 | 1,007.5 | 504.3 | 990.5   | 989.5   | 8  |
| 4  | 499.3   | 250.1 | 482.3   | 481.3   | E   | 850.4   | 425.7 | 833.4   | 832.4   | 7  |
| 5  | 612.4   | 306.7 | 595.3   | 594.4   | I   | 721.4   | 361.2 | 704.4   | 703.4   | 6  |
| 6  | 683.4   | 342.2 | 666.4   | 665.4   | A   | 608.3   |       | 591.3   | 590.3   | 5  |
| 7  | 811.5   | 406.2 | 794.4   | 793.5   | Q   | 537.3   |       | 520.2   | 519.3   | 4  |
| 8  | 926.5   | 463.8 | 909.5   | 908.5   | D   | 409.2   |       | 392.2   | 391.2   | 3  |
| 9  | 1,073.6 | 537.3 | 1,056.5 | 1,055.6 | F   | 294.2   |       | 277.2   |         | 2  |
| 10 | 1,219.7 | 610.3 | 1,202.6 | 1,201.7 | K   | 147.1   |       | 130.1   |         | 1  |

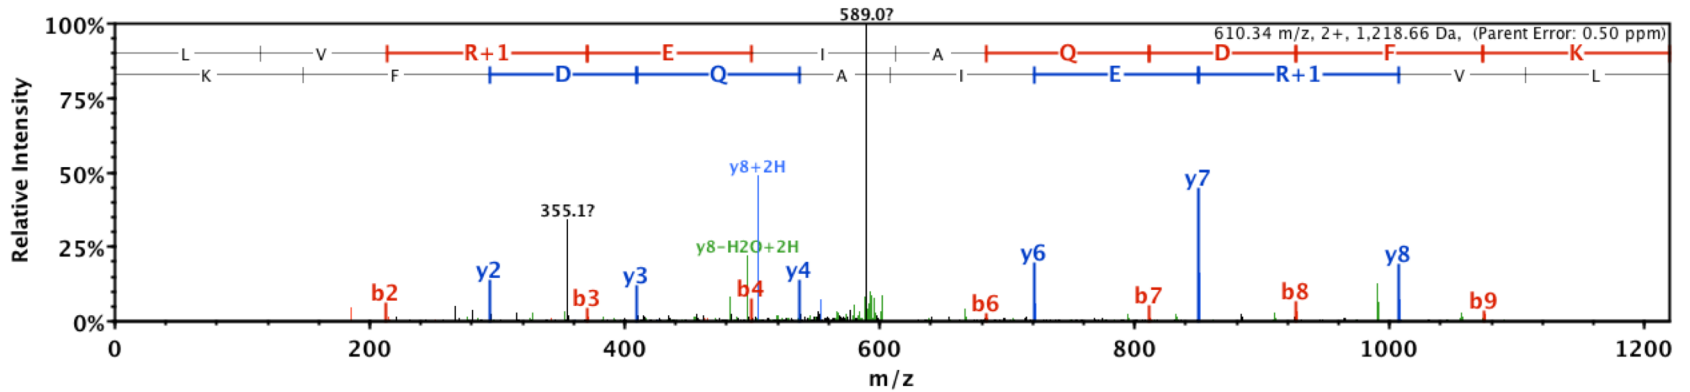

| B  | B Ions  | B+2H  | B-NH3   | B-H2O   | AA  | Y Ions  | Y+2H  | Y-NH3   | Y-H2O   | Y  |
|----|---------|-------|---------|---------|-----|---------|-------|---------|---------|----|
| 1  | 114.1   |       |         |         | L   | 1,219.7 | 610.3 | 1,202.6 | 1,201.7 | 10 |
| 2  | 213.2   |       |         |         | V   | 1,106.6 | 553.8 | 1,089.6 | 1,088.6 | 9  |
| 3  | 370.2   | 185.6 | 353.2   |         | R+1 | 1,007.5 | 504.3 | 990.5   | 989.5   | 8  |
| 4  | 499.3   | 250.1 | 482.3   | 481.3   | E   | 850.4   | 425.7 | 833.4   | 832.4   | 7  |
| 5  | 612.4   | 306.7 | 595.3   | 594.4   | I   | 721.4   | 361.2 | 704.4   | 703.4   | 6  |
| 6  | 683.4   | 342.2 | 666.4   | 665.4   | A   | 608.3   |       | 591.3   | 590.3   | 5  |
| 7  | 811.5   | 406.2 | 794.4   | 793.5   | Q   | 537.3   |       | 520.2   | 519.3   | 4  |
| 8  | 926.5   | 463.8 | 909.5   | 908.5   | D   | 409.2   |       | 392.2   | 391.2   | 3  |
| 9  | 1,073.6 | 537.3 | 1,056.5 | 1,055.6 | F   | 294.2   |       | 277.2   |         | 2  |
| 10 | 1,219.7 | 610.3 | 1,202.6 | 1,201.7 | K   | 147.1   |       | 130.1   |         | 1  |

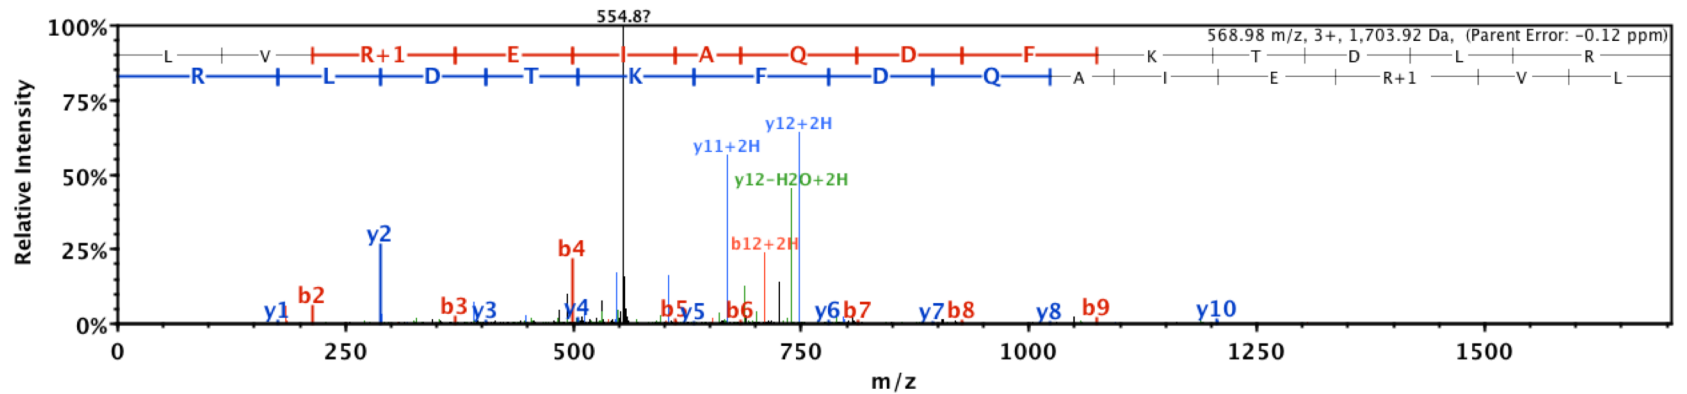

| B  | B Ions  | B+2H  | B-NH3   | B-H2O   | AA  | Y Ions  | Y+2H  | Y-NH3   | Y-H2O   | Y  |
|----|---------|-------|---------|---------|-----|---------|-------|---------|---------|----|
| 1  | 114.1   | 57.5  |         |         | L   | 1,704.9 | 853.0 | 1,687.9 | 1,686.9 | 14 |
| 2  | 213.2   | 107.1 |         |         | V   | 1,591.8 | 796.4 | 1,574.8 | 1,573.8 | 13 |
| 3  | 370.2   | 185.6 | 353.2   |         | R+1 | 1,492.8 | 746.9 | 1,475.7 | 1,474.8 | 12 |
| 4  | 499.3   | 250.1 | 482.3   | 481.3   | E   | 1,335.7 | 668.3 | 1,318.7 | 1,317.7 | 11 |
| 5  | 612.4   | 306.7 | 595.3   | 594.4   | I   | 1,206.6 | 603.8 | 1,189.6 | 1,188.6 | 10 |
| 6  | 683.4   | 342.2 | 666.4   | 665.4   | A   | 1,093.6 | 547.3 | 1,076.5 | 1,075.6 | 9  |
| 7  | 811.5   | 406.2 | 794.4   | 793.5   | Q   | 1,022.5 | 511.8 | 1,005.5 | 1,004.5 | 8  |
| 8  | 926.5   | 463.8 | 909.5   | 908.5   | D   | 894.5   | 447.7 | 877.4   | 876.5   | 7  |
| 9  | 1,073.6 | 537.3 | 1,056.5 | 1,055.6 | F   | 779.4   | 390.2 | 762.4   | 761.4   | 6  |
| 10 | 1,201.7 | 601.3 | 1,184.6 | 1,183.6 | K   | 632.4   | 316.7 | 615.3   | 614.4   | 5  |
| 11 | 1,302.7 | 651.9 | 1,285.7 | 1,284.7 | T   | 504.3   | 252.6 | 487.3   | 486.3   | 4  |
| 12 | 1,417.7 | 709.4 | 1,400.7 | 1,399.7 | D   | 403.2   | 202.1 | 386.2   | 385.2   | 3  |
| 13 | 1,530.8 | 765.9 | 1,513.8 | 1,512.8 | L   | 288.2   | 144.6 | 271.2   |         | 2  |
| 14 | 1,704.9 | 853.0 | 1,687.9 | 1,686.9 | R   | 175.1   | 88.1  | 158.1   |         | 1  |

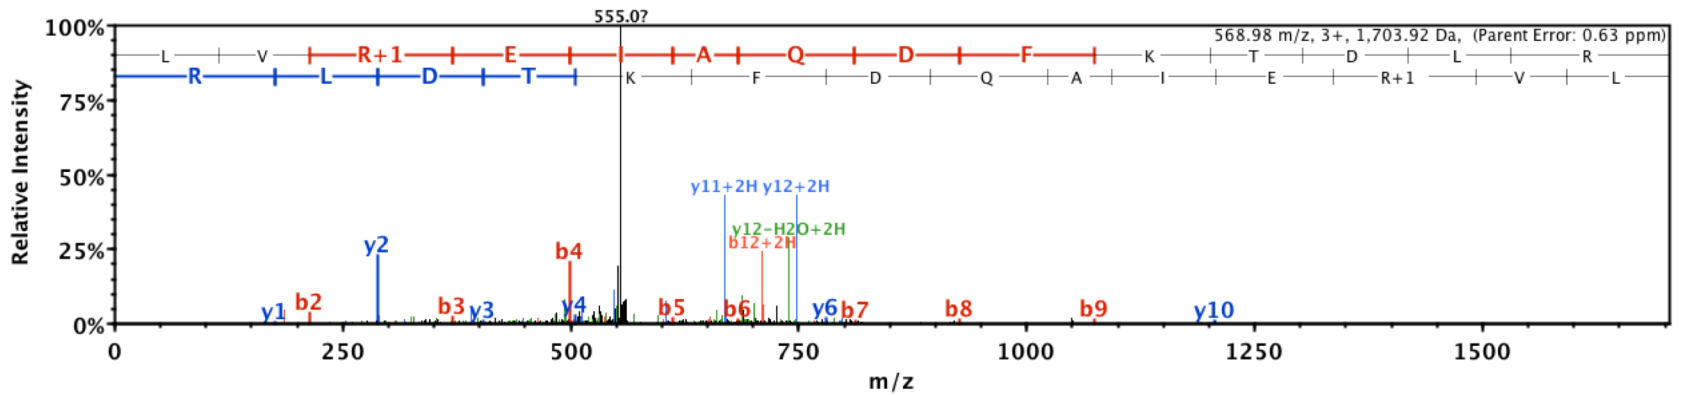

| B  | B Ions  | B+2H  | B-NH3   | B-H2O   | AA  | Y Ions  | Y+2H  | Y-NH3   | Y-H2O   | Y  |
|----|---------|-------|---------|---------|-----|---------|-------|---------|---------|----|
| 1  | 114.1   | 57.5  |         |         | L   | 1,704.9 | 853.0 | 1,687.9 | 1,686.9 | 14 |
| 2  | 213.2   | 107.1 |         |         | V   | 1,591.8 | 796.4 | 1,574.8 | 1,573.8 | 13 |
| 3  | 370.2   | 185.6 | 353.2   |         | R+1 | 1,492.8 | 746.9 | 1,475.7 | 1,474.8 | 12 |
| 4  | 499.3   | 250.1 | 482.3   | 481.3   | E   | 1,335.7 | 668.3 | 1,318.7 | 1,317.7 | 11 |
| 5  | 612.4   | 306.7 | 595.3   | 594.4   | I   | 1,206.6 | 603.8 | 1,189.6 | 1,188.6 | 10 |
| 6  | 683.4   | 342.2 | 666.4   | 665.4   | A   | 1,093.6 | 547.3 | 1,076.5 | 1,075.6 | 9  |
| 7  | 811.5   | 406.2 | 794.4   | 793.5   | Q   | 1,022.5 | 511.8 | 1,005.5 | 1,004.5 | 8  |
| 8  | 926.5   | 463.8 | 909.5   | 908.5   | D   | 894.5   | 447.7 | 877.4   | 876.5   | 7  |
| 9  | 1,073.6 | 537.3 | 1,056.5 | 1,055.6 | F   | 779.4   | 390.2 | 762.4   | 761.4   | 6  |
| 10 | 1,201.7 | 601.3 | 1,184.6 | 1,183.6 | K   | 632.4   | 316.7 | 615.3   | 614.4   | 5  |
| 11 | 1,302.7 | 651.9 | 1,285.7 | 1,284.7 | T   | 504.3   | 252.6 | 487.3   | 486.3   | 4  |
| 12 | 1,417.7 | 709.4 | 1,400.7 | 1,399.7 | D   | 403.2   | 202.1 | 386.2   | 385.2   | 3  |
| 13 | 1,530.8 | 765.9 | 1,513.8 | 1,512.8 | L   | 288.2   | 144.6 | 271.2   |         | 2  |
| 14 | 1,704.9 | 853.0 | 1,687.9 | 1,686.9 | R   | 175.1   | 88.1  | 158.1   |         | 1  |

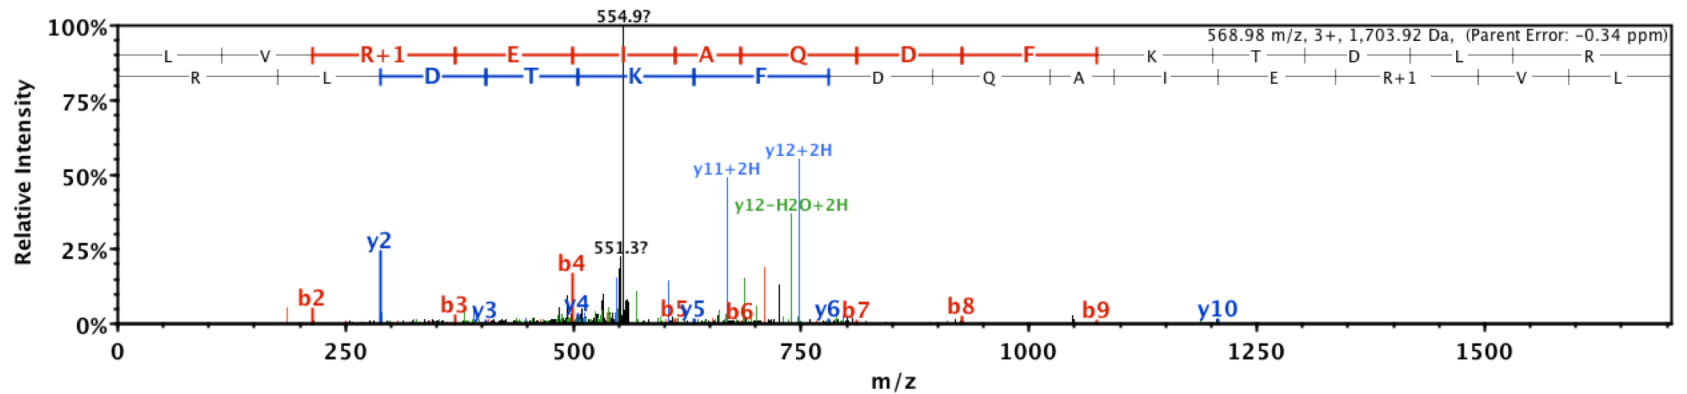

| B  | B Ions  | B+2H  | B-NH3   | B-H2O   | AA  | Y Ions  | Y+2H  | Y-NH3   | Y-H2O   | Y  |
|----|---------|-------|---------|---------|-----|---------|-------|---------|---------|----|
| 1  | 114.1   | 57.5  |         |         | L   | 1,704.9 | 853.0 | 1,687.9 | 1,686.9 | 14 |
| 2  | 213.2   | 107.1 |         |         | V   | 1,591.8 | 796.4 | 1,574.8 | 1,573.8 | 13 |
| 3  | 370.2   | 185.6 | 353.2   |         | R+1 | 1,492.8 | 746.9 | 1,475.7 | 1,474.8 | 12 |
| 4  | 499.3   | 250.1 | 482.3   | 481.3   | E   | 1,335.7 | 668.3 | 1,318.7 | 1,317.7 | 11 |
| 5  | 612.4   | 306.7 | 595.3   | 594.4   | I   | 1,206.6 | 603.8 | 1,189.6 | 1,188.6 | 10 |
| 6  | 683.4   | 342.2 | 666.4   | 665.4   | A   | 1,093.6 | 547.3 | 1,076.5 | 1,075.6 | 9  |
| 7  | 811.5   | 406.2 | 794.4   | 793.5   | Q   | 1,022.5 | 511.8 | 1,005.5 | 1,004.5 | 8  |
| 8  | 926.5   | 463.8 | 909.5   | 908.5   | D   | 894.5   | 447.7 | 877.4   | 876.5   | 7  |
| 9  | 1,073.6 | 537.3 | 1,056.5 | 1,055.6 | F   | 779.4   | 390.2 | 762.4   | 761.4   | 6  |
| 10 | 1,201.7 | 601.3 | 1,184.6 | 1,183.6 | K   | 632.4   | 316.7 | 615.3   | 614.4   | 5  |
| 11 | 1,302.7 | 651.9 | 1,285.7 | 1,284.7 | T   | 504.3   | 252.6 | 487.3   | 486.3   | 4  |
| 12 | 1,417.7 | 709.4 | 1,400.7 | 1,399.7 | D   | 403.2   | 202.1 | 386.2   | 385.2   | 3  |
| 13 | 1,530.8 | 765.9 | 1,513.8 | 1,512.8 | L   | 288.2   | 144.6 | 271.2   |         | 2  |
| 14 | 1,704.9 | 853.0 | 1,687.9 | 1,686.9 | R   | 175.1   | 88.1  | 158.1   |         | 1  |

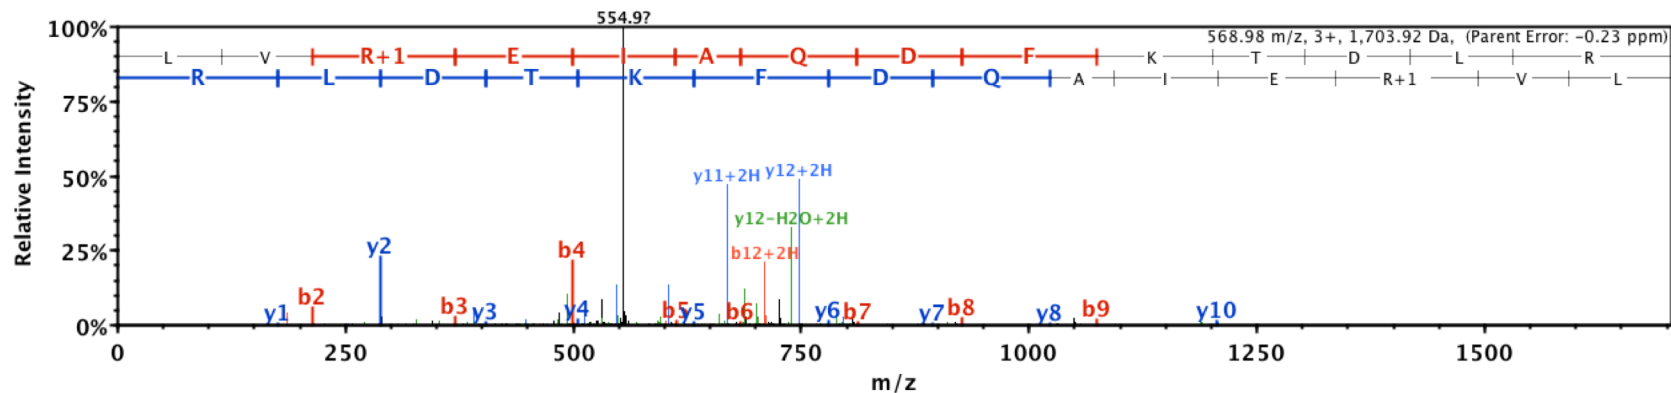

| B  | B Ions  | B+2H  | B-NH3   | B-H2O   | AA  | Y Ions  | Y+2H  | Y-NH3   | Y-H2O   | Y  |
|----|---------|-------|---------|---------|-----|---------|-------|---------|---------|----|
| 1  | 114.1   | 57.5  |         |         | L   | 1,704.9 | 853.0 | 1,687.9 | 1,686.9 | 14 |
| 2  | 213.2   | 107.1 |         |         | V   | 1,591.8 | 796.4 | 1,574.8 | 1,573.8 | 13 |
| 3  | 370.2   | 185.6 | 353.2   |         | R+1 | 1,492.8 | 746.9 | 1,475.7 | 1,474.8 | 12 |
| 4  | 499.3   | 250.1 | 482.3   | 481.3   | E   | 1,335.7 | 668.3 | 1,318.7 | 1,317.7 | 11 |
| 5  | 612.4   | 306.7 | 595.3   | 594.4   | I   | 1,206.6 | 603.8 | 1,189.6 | 1,188.6 | 10 |
| 6  | 683.4   | 342.2 | 666.4   | 665.4   | A   | 1,093.6 | 547.3 | 1,076.5 | 1,075.6 | 9  |
| 7  | 811.5   | 406.2 | 794.4   | 793.5   | Q   | 1,022.5 | 511.8 | 1,005.5 | 1,004.5 | 8  |
| 8  | 926.5   | 463.8 | 909.5   | 908.5   | D   | 894.5   | 447.7 | 877.4   | 876.5   | 7  |
| 9  | 1,073.6 | 537.3 | 1,056.5 | 1,055.6 | F   | 779.4   | 390.2 | 762.4   | 761.4   | 6  |
| 10 | 1,201.7 | 601.3 | 1,184.6 | 1,183.6 | K   | 632.4   | 316.7 | 615.3   | 614.4   | 5  |
| 11 | 1,302.7 | 651.9 | 1,285.7 | 1,284.7 | T   | 504.3   | 252.6 | 487.3   | 486.3   | 4  |
| 12 | 1,417.7 | 709.4 | 1,400.7 | 1,399.7 | D   | 403.2   | 202.1 | 386.2   | 385.2   | 3  |
| 13 | 1,530.8 | 765.9 | 1,513.8 | 1,512.8 | L   | 288.2   | 144.6 | 271.2   |         | 2  |
| 14 | 1,704.9 | 853.0 | 1,687.9 | 1,686.9 | R   | 175.1   | 88.1  | 158.1   |         | 1  |

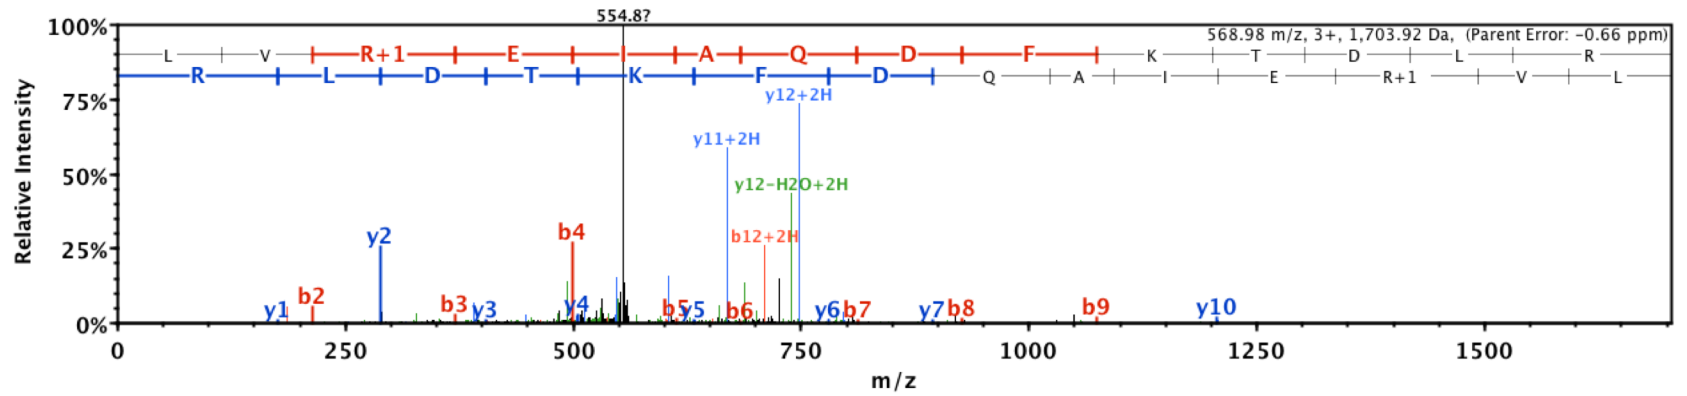

| B  | B Ions  | B+2H  | B-NH3   | B-H2O   | AA  | Y Ions  | Y+2H  | Y-NH3   | Y-H2O   | Y  |
|----|---------|-------|---------|---------|-----|---------|-------|---------|---------|----|
| 1  | 114.1   | 57.5  |         |         | L   | 1,704.9 | 853.0 | 1,687.9 | 1,686.9 | 14 |
| 2  | 213.2   | 107.1 |         |         | V   | 1,591.8 | 796.4 | 1,574.8 | 1,573.8 | 13 |
| 3  | 370.2   | 185.6 | 353.2   |         | R+1 | 1,492.8 | 746.9 | 1,475.7 | 1,474.8 | 12 |
| 4  | 499.3   | 250.1 | 482.3   | 481.3   | E   | 1,335.7 | 668.3 | 1,318.7 | 1,317.7 | 11 |
| 5  | 612.4   | 306.7 | 595.3   | 594.4   | I   | 1,206.6 | 603.8 | 1,189.6 | 1,188.6 | 10 |
| 6  | 683.4   | 342.2 | 666.4   | 665.4   | A   | 1,093.6 | 547.3 | 1,076.5 | 1,075.6 | 9  |
| 7  | 811.5   | 406.2 | 794.4   | 793.5   | Q   | 1,022.5 | 511.8 | 1,005.5 | 1,004.5 | 8  |
| 8  | 926.5   | 463.8 | 909.5   | 908.5   | D   | 894.5   | 447.7 | 877.4   | 876.5   | 7  |
| 9  | 1,073.6 | 537.3 | 1,056.5 | 1,055.6 | F   | 779.4   | 390.2 | 762.4   | 761.4   | 6  |
| 10 | 1,201.7 | 601.3 | 1,184.6 | 1,183.6 | K   | 632.4   | 316.7 | 615.3   | 614.4   | 5  |
| 11 | 1,302.7 | 651.9 | 1,285.7 | 1,284.7 | T   | 504.3   | 252.6 | 487.3   | 486.3   | 4  |
| 12 | 1,417.7 | 709.4 | 1,400.7 | 1,399.7 | D   | 403.2   | 202.1 | 386.2   | 385.2   | 3  |
| 13 | 1,530.8 | 765.9 | 1,513.8 | 1,512.8 | L   | 288.2   | 144.6 | 271.2   |         | 2  |
| 14 | 1,704.9 | 853.0 | 1,687.9 | 1,686.9 | R   | 175.1   | 88.1  | 158.1   |         | 1  |

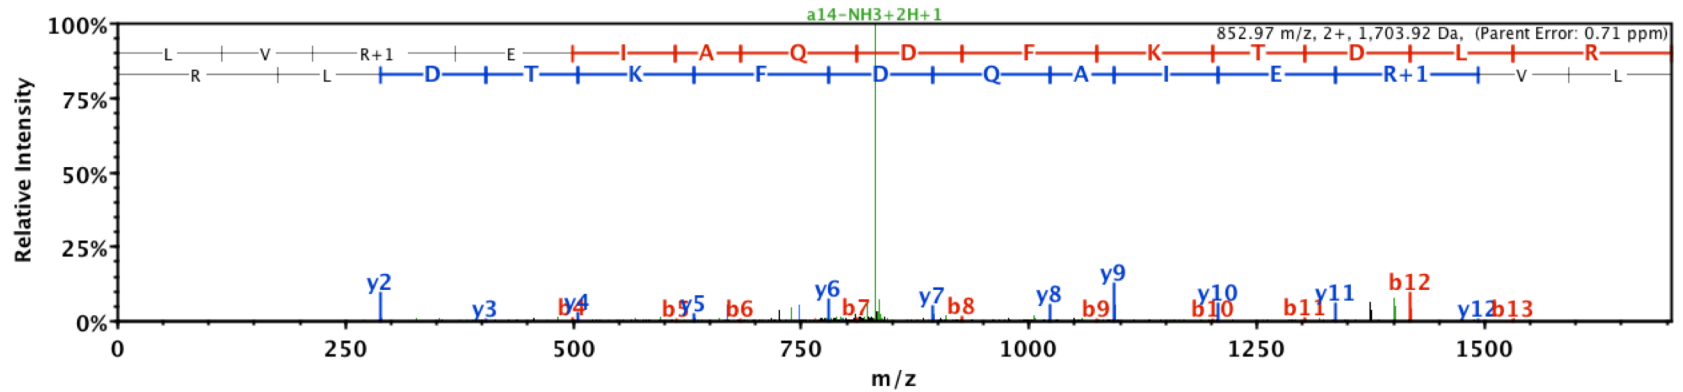

| B  | B Ions  | B+2H  | B-NH3   | B-H2O   | AA  | Y Ions  | Y+2H  | Y-NH3   | Y-H2O   | Y  |
|----|---------|-------|---------|---------|-----|---------|-------|---------|---------|----|
| 1  | 114.1   |       |         |         | L   | 1,704.9 | 853.0 | 1,687.9 | 1,686.9 | 14 |
| 2  | 213.2   |       |         |         | V   | 1,591.8 | 796.4 | 1,574.8 | 1,573.8 | 13 |
| 3  | 370.2   | 185.6 | 353.2   |         | R+1 | 1,492.8 | 746.9 | 1,475.7 | 1,474.8 | 12 |
| 4  | 499.3   | 250.1 | 482.3   | 481.3   | E   | 1,335.7 | 668.3 | 1,318.7 | 1,317.7 | 11 |
| 5  | 612.4   | 306.7 | 595.3   | 594.4   | I   | 1,206.6 | 603.8 | 1,189.6 | 1,188.6 | 10 |
| 6  | 683.4   | 342.2 | 666.4   | 665.4   | A   | 1,093.6 | 547.3 | 1,076.5 | 1,075.6 | 9  |
| 7  | 811.5   | 406.2 | 794.4   | 793.5   | Q   | 1,022.5 | 511.8 | 1,005.5 | 1,004.5 | 8  |
| 8  | 926.5   | 463.8 | 909.5   | 908.5   | D   | 894.5   | 447.7 | 877.4   | 876.5   | 7  |
| 9  | 1,073.6 | 537.3 | 1,056.5 | 1,055.6 | F   | 779.4   | 390.2 | 762.4   | 761.4   | 6  |
| 10 | 1,201.7 | 601.3 | 1,184.6 | 1,183.6 | K   | 632.4   | 316.7 | 615.3   | 614.4   | 5  |
| 11 | 1,302.7 | 651.9 | 1,285.7 | 1,284.7 | T   | 504.3   |       | 487.3   | 486.3   | 4  |
| 12 | 1,417.7 | 709.4 | 1,400.7 | 1,399.7 | D   | 403.2   |       | 386.2   | 385.2   | 3  |
| 13 | 1,530.8 | 765.9 | 1,513.8 | 1,512.8 | L   | 288.2   |       | 271.2   |         | 2  |
| 14 | 1,704.9 | 853.0 | 1,687.9 | 1,686.9 | R   | 175.1   |       | 158.1   |         | 1  |



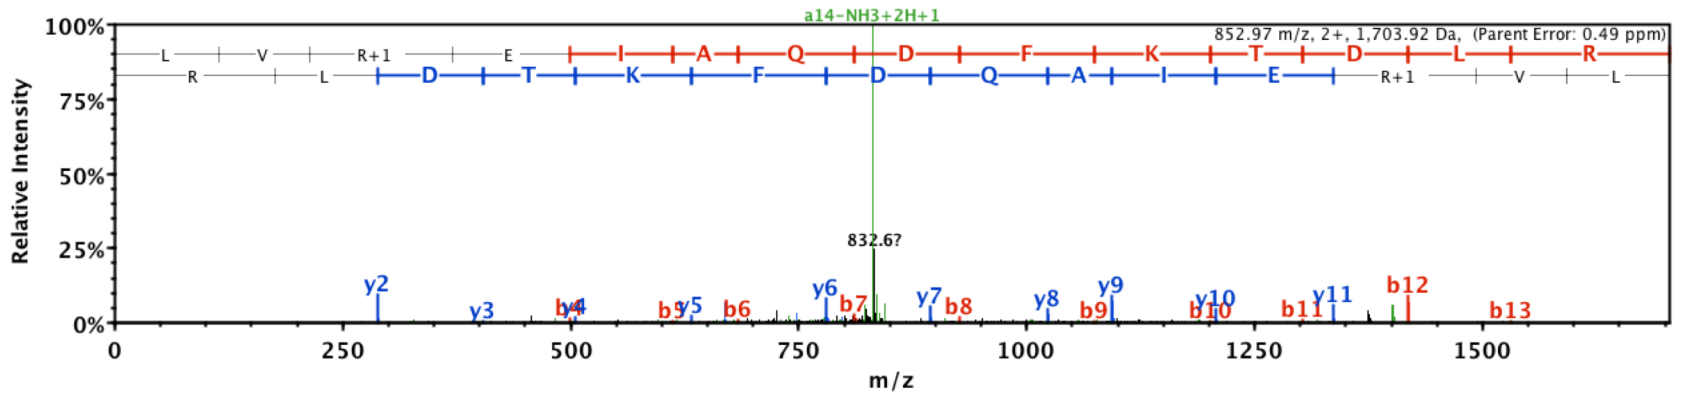

| B  | B Ions  | B+2H  | B-NH3   | B-H2O   | AA  | Y Ions  | Y+2H  | Y-NH3   | Y-H2O   | Y  |
|----|---------|-------|---------|---------|-----|---------|-------|---------|---------|----|
| 1  | 114.1   |       |         |         | L   | 1,704.9 | 853.0 | 1,687.9 | 1,686.9 | 14 |
| 2  | 213.2   |       |         |         | V   | 1,591.8 | 796.4 | 1,574.8 | 1,573.8 | 13 |
| 3  | 370.2   | 185.6 | 353.2   |         | R+1 | 1,492.8 | 746.9 | 1,475.7 | 1,474.8 | 12 |
| 4  | 499.3   | 250.1 | 482.3   | 481.3   | E   | 1,335.7 | 668.3 | 1,318.7 | 1,317.7 | 11 |
| 5  | 612.4   | 306.7 | 595.3   | 594.4   | I   | 1,206.6 | 603.8 | 1,189.6 | 1,188.6 | 10 |
| 6  | 683.4   | 342.2 | 666.4   | 665.4   | A   | 1,093.6 | 547.3 | 1,076.5 | 1,075.6 | 9  |
| 7  | 811.5   | 406.2 | 794.4   | 793.5   | Q   | 1,022.5 | 511.8 | 1,005.5 | 1,004.5 | 8  |
| 8  | 926.5   | 463.8 | 909.5   | 908.5   | D   | 894.5   | 447.7 | 877.4   | 876.5   | 7  |
| 9  | 1,073.6 | 537.3 | 1,056.5 | 1,055.6 | F   | 779.4   | 390.2 | 762.4   | 761.4   | 6  |
| 10 | 1,201.7 | 601.3 | 1,184.6 | 1,183.6 | K   | 632.4   | 316.7 | 615.3   | 614.4   | 5  |
| 11 | 1,302.7 | 651.9 | 1,285.7 | 1,284.7 | T   | 504.3   |       | 487.3   | 486.3   | 4  |
| 12 | 1,417.7 | 709.4 | 1,400.7 | 1,399.7 | D   | 403.2   |       | 386.2   | 385.2   | 3  |
| 13 | 1,530.8 | 765.9 | 1,513.8 | 1,512.8 | L   | 288.2   |       | 271.2   |         | 2  |
| 14 | 1,704.9 | 853.0 | 1,687.9 | 1,686.9 | R   | 175.1   |       | 158.1   |         | 1  |

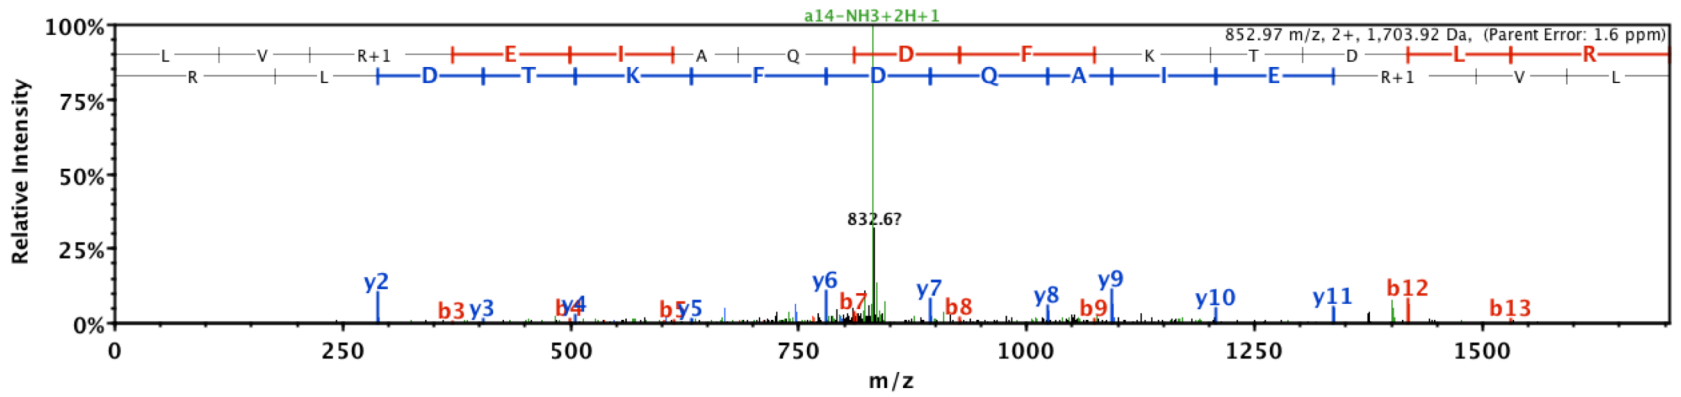

| B  | B Ions  | B+2H  | B-NH3   | B-H2O   | AA  | Y Ions  | Y+2H  | Y-NH3   | Y-H2O   | Y  |
|----|---------|-------|---------|---------|-----|---------|-------|---------|---------|----|
| 1  | 114.1   |       |         |         | L   | 1,704.9 | 853.0 | 1,687.9 | 1,686.9 | 14 |
| 2  | 213.2   |       |         |         | V   | 1,591.8 | 796.4 | 1,574.8 | 1,573.8 | 13 |
| 3  | 370.2   | 185.6 | 353.2   |         | R+1 | 1,492.8 | 746.9 | 1,475.7 | 1,474.8 | 12 |
| 4  | 499.3   | 250.1 | 482.3   | 481.3   | E   | 1,335.7 | 668.3 | 1,318.7 | 1,317.7 | 11 |
| 5  | 612.4   | 306.7 | 595.3   | 594.4   | I   | 1,206.6 | 603.8 | 1,189.6 | 1,188.6 | 10 |
| 6  | 683.4   | 342.2 | 666.4   | 665.4   | A   | 1,093.6 | 547.3 | 1,076.5 | 1,075.6 | 9  |
| 7  | 811.5   | 406.2 | 794.4   | 793.5   | Q   | 1,022.5 | 511.8 | 1,005.5 | 1,004.5 | 8  |
| 8  | 926.5   | 463.8 | 909.5   | 908.5   | D   | 894.5   | 447.7 | 877.4   | 876.5   | 7  |
| 9  | 1,073.6 | 537.3 | 1,056.5 | 1,055.6 | F   | 779.4   | 390.2 | 762.4   | 761.4   | 6  |
| 10 | 1,201.7 | 601.3 | 1,184.6 | 1,183.6 | K   | 632.4   | 316.7 | 615.3   | 614.4   | 5  |
| 11 | 1,302.7 | 651.9 | 1,285.7 | 1,284.7 | T   | 504.3   |       | 487.3   | 486.3   | 4  |
| 12 | 1,417.7 | 709.4 | 1,400.7 | 1,399.7 | D   | 403.2   |       | 386.2   | 385.2   | 3  |
| 13 | 1,530.8 | 765.9 | 1,513.8 | 1,512.8 | L   | 288.2   |       | 271.2   |         | 2  |
| 14 | 1,704.9 | 853.0 | 1,687.9 | 1,686.9 | R   | 175.1   |       | 158.1   |         | 1  |

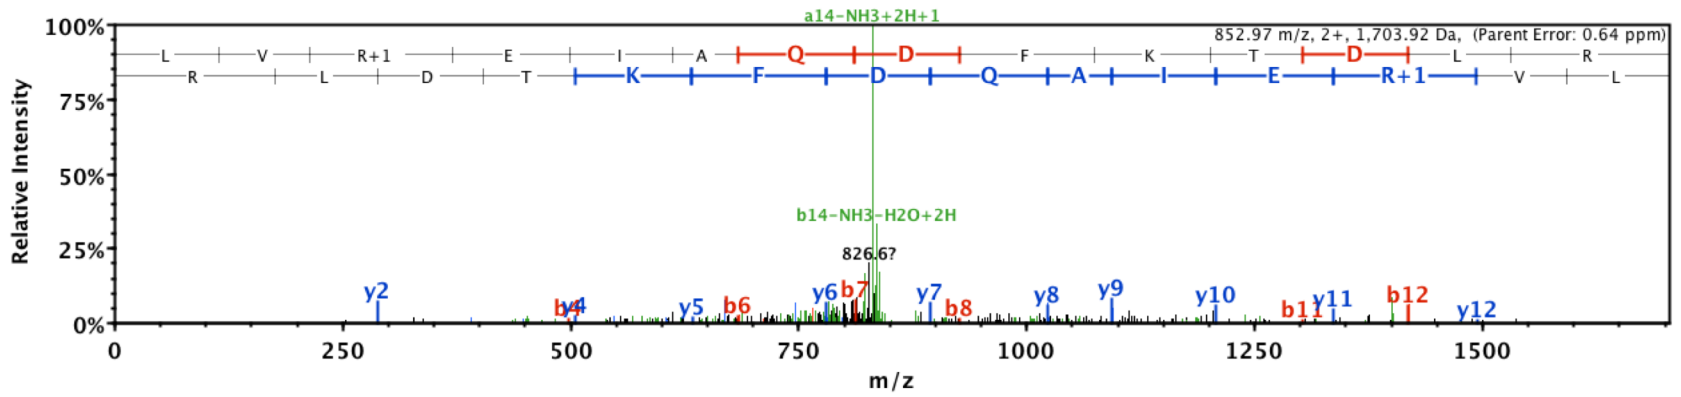

| B  | B Ions  | B+2H  | B-NH3   | B-H2O   | AA  | Y Ions  | Y+2H  | Y-NH3   | Y-H2O   | Y  |
|----|---------|-------|---------|---------|-----|---------|-------|---------|---------|----|
| 1  | 114.1   |       |         |         | L   | 1,704.9 | 853.0 | 1,687.9 | 1,686.9 | 14 |
| 2  | 213.2   |       |         |         | V   | 1,591.8 | 796.4 | 1,574.8 | 1,573.8 | 13 |
| 3  | 370.2   | 185.6 | 353.2   |         | R+1 | 1,492.8 | 746.9 | 1,475.7 | 1,474.8 | 12 |
| 4  | 499.3   | 250.1 | 482.3   | 481.3   | E   | 1,335.7 | 668.3 | 1,318.7 | 1,317.7 | 11 |
| 5  | 612.4   | 306.7 | 595.3   | 594.4   | I   | 1,206.6 | 603.8 | 1,189.6 | 1,188.6 | 10 |
| 6  | 683.4   | 342.2 | 666.4   | 665.4   | A   | 1,093.6 | 547.3 | 1,076.5 | 1,075.6 | 9  |
| 7  | 811.5   | 406.2 | 794.4   | 793.5   | Q   | 1,022.5 | 511.8 | 1,005.5 | 1,004.5 | 8  |
| 8  | 926.5   | 463.8 | 909.5   | 908.5   | D   | 894.5   | 447.7 | 877.4   | 876.5   | 7  |
| 9  | 1,073.6 | 537.3 | 1,056.5 | 1,055.6 | F   | 779.4   | 390.2 | 762.4   | 761.4   | 6  |
| 10 | 1,201.7 | 601.3 | 1,184.6 | 1,183.6 | K   | 632.4   | 316.7 | 615.3   | 614.4   | 5  |
| 11 | 1,302.7 | 651.9 | 1,285.7 | 1,284.7 | T   | 504.3   |       | 487.3   | 486.3   | 4  |
| 12 | 1,417.7 | 709.4 | 1,400.7 | 1,399.7 | D   | 403.2   |       | 386.2   | 385.2   | 3  |
| 13 | 1,530.8 | 765.9 | 1,513.8 | 1,512.8 | L   | 288.2   |       | 271.2   |         | 2  |
| 14 | 1,704.9 | 853.0 | 1,687.9 | 1,686.9 | R   | 175.1   |       | 158.1   |         | 1  |

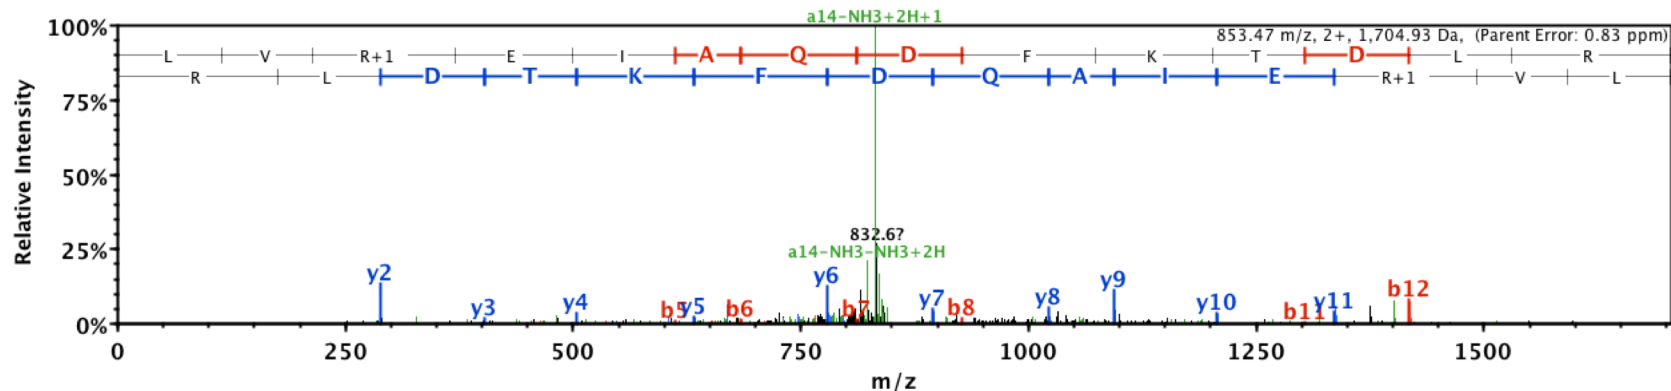

| B  | B Ions  | B+2H  | B-NH3   | B-H2O   | AA  | Y Ions  | Y+2H  | Y-NH3   | Y-H2O   | Y  |
|----|---------|-------|---------|---------|-----|---------|-------|---------|---------|----|
| 1  | 114.1   |       |         |         | L   | 1,704.9 | 853.0 | 1,687.9 | 1,686.9 | 14 |
| 2  | 213.2   |       |         |         | V   | 1,591.8 | 796.4 | 1,574.8 | 1,573.8 | 13 |
| 3  | 370.2   | 185.6 | 353.2   |         | R+1 | 1,492.8 | 746.9 | 1,475.7 | 1,474.8 | 12 |
| 4  | 499.3   | 250.1 | 482.3   | 481.3   | E   | 1,335.7 | 668.3 | 1,318.7 | 1,317.7 | 11 |
| 5  | 612.4   | 306.7 | 595.3   | 594.4   | I   | 1,206.6 | 603.8 | 1,189.6 | 1,188.6 | 10 |
| 6  | 683.4   | 342.2 | 666.4   | 665.4   | A   | 1,093.6 | 547.3 | 1,076.5 | 1,075.6 | 9  |
| 7  | 811.5   | 406.2 | 794.4   | 793.5   | Q   | 1,022.5 | 511.8 | 1,005.5 | 1,004.5 | 8  |
| 8  | 926.5   | 463.8 | 909.5   | 908.5   | D   | 894.5   | 447.7 | 877.4   | 876.5   | 7  |
| 9  | 1,073.6 | 537.3 | 1,056.5 | 1,055.6 | F   | 779.4   | 390.2 | 762.4   | 761.4   | 6  |
| 10 | 1,201.7 | 601.3 | 1,184.6 | 1,183.6 | K   | 632.4   | 316.7 | 615.3   | 614.4   | 5  |
| 11 | 1,302.7 | 651.9 | 1,285.7 | 1,284.7 | T   | 504.3   |       | 487.3   | 486.3   | 4  |
| 12 | 1,417.7 | 709.4 | 1,400.7 | 1,399.7 | D   | 403.2   |       | 386.2   | 385.2   | 3  |
| 13 | 1,530.8 | 765.9 | 1,513.8 | 1,512.8 | L   | 288.2   |       | 271.2   |         | 2  |
| 14 | 1,704.9 | 853.0 | 1,687.9 | 1,686.9 | R   | 175.1   |       | 158.1   |         | 1  |

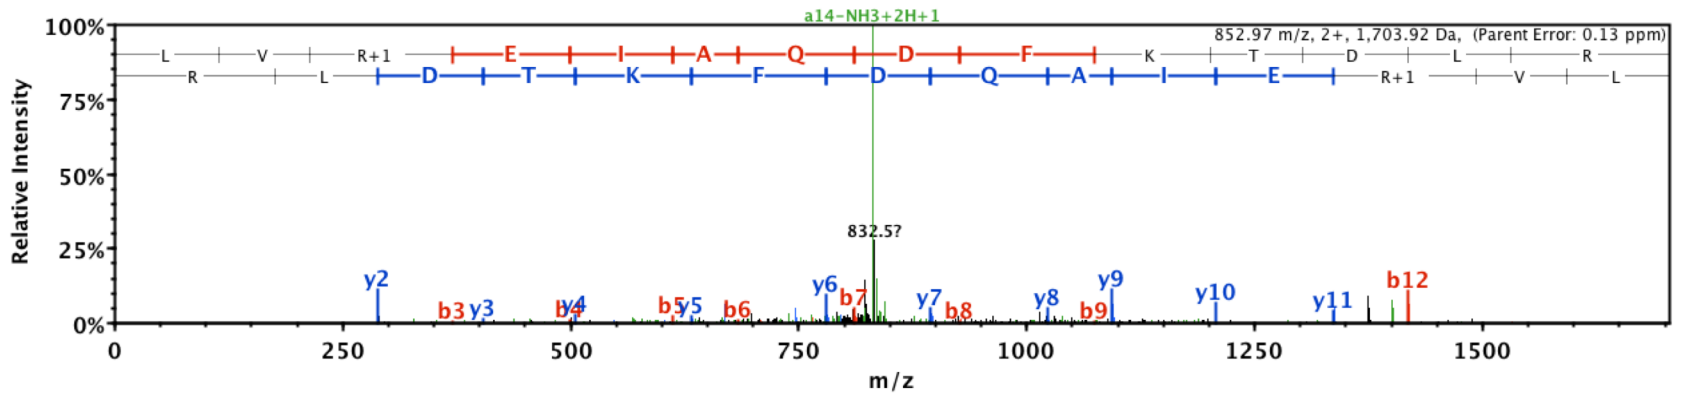

| B  | B Ions  | B+2H  | B-NH3   | B-H2O   | AA  | Y Ions  | Y+2H  | Y-NH3   | Y-H2O   | Y  |
|----|---------|-------|---------|---------|-----|---------|-------|---------|---------|----|
| 1  | 114.1   |       |         |         | L   | 1,704.9 | 853.0 | 1,687.9 | 1,686.9 | 14 |
| 2  | 213.2   |       |         |         | V   | 1,591.8 | 796.4 | 1,574.8 | 1,573.8 | 13 |
| 3  | 370.2   | 185.6 | 353.2   |         | R+1 | 1,492.8 | 746.9 | 1,475.7 | 1,474.8 | 12 |
| 4  | 499.3   | 250.1 | 482.3   | 481.3   | E   | 1,335.7 | 668.3 | 1,318.7 | 1,317.7 | 11 |
| 5  | 612.4   | 306.7 | 595.3   | 594.4   | I   | 1,206.6 | 603.8 | 1,189.6 | 1,188.6 | 10 |
| 6  | 683.4   | 342.2 | 666.4   | 665.4   | A   | 1,093.6 | 547.3 | 1,076.5 | 1,075.6 | 9  |
| 7  | 811.5   | 406.2 | 794.4   | 793.5   | Q   | 1,022.5 | 511.8 | 1,005.5 | 1,004.5 | 8  |
| 8  | 926.5   | 463.8 | 909.5   | 908.5   | D   | 894.5   | 447.7 | 877.4   | 876.5   | 7  |
| 9  | 1,073.6 | 537.3 | 1,056.5 | 1,055.6 | F   | 779.4   | 390.2 | 762.4   | 761.4   | 6  |
| 10 | 1,201.7 | 601.3 | 1,184.6 | 1,183.6 | K   | 632.4   | 316.7 | 615.3   | 614.4   | 5  |
| 11 | 1,302.7 | 651.9 | 1,285.7 | 1,284.7 | T   | 504.3   |       | 487.3   | 486.3   | 4  |
| 12 | 1,417.7 | 709.4 | 1,400.7 | 1,399.7 | D   | 403.2   |       | 386.2   | 385.2   | 3  |
| 13 | 1,530.8 | 765.9 | 1,513.8 | 1,512.8 | L   | 288.2   |       | 271.2   |         | 2  |
| 14 | 1,704.9 | 853.0 | 1,687.9 | 1,686.9 | R   | 175.1   |       | 158.1   |         | 1  |

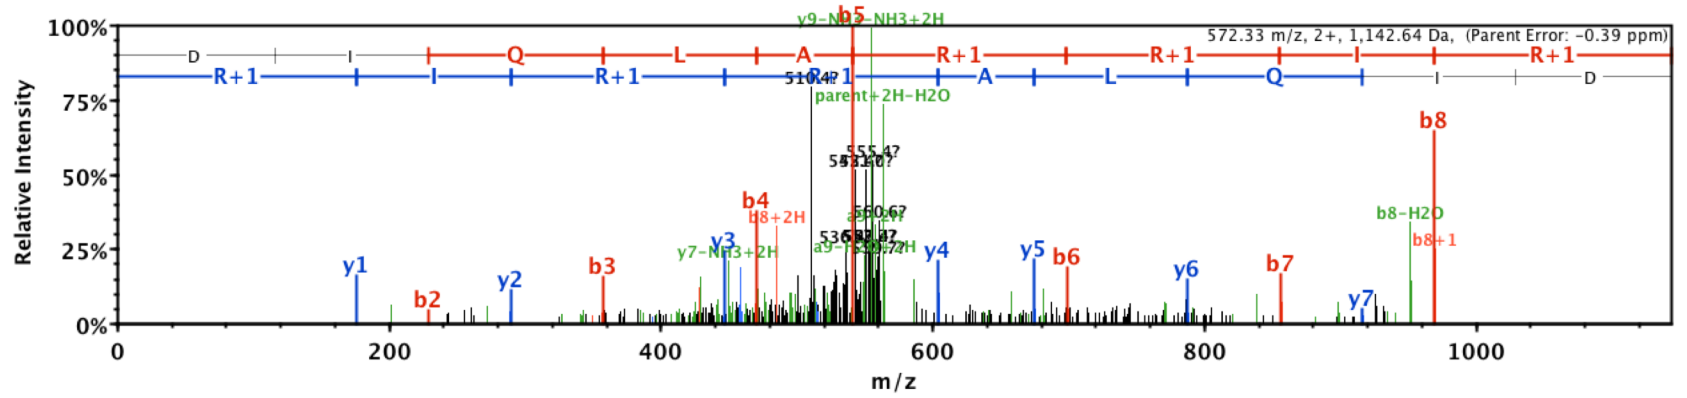

| B | B Ions  | B+2H  | B-NH3   | B-H2O   | AA  | Y Ions  | Y+2H  | Y-NH3   | Y-H2O   | Y |
|---|---------|-------|---------|---------|-----|---------|-------|---------|---------|---|
| 1 | 116.0   |       |         | 98.0    | D   | 1,143.6 | 572.3 | 1,126.6 | 1,125.6 | 9 |
| 2 | 229.1   |       |         | 211.1   | I   | 1,028.6 | 514.8 | 1,011.6 |         | 8 |
| 3 | 357.2   |       | 340.2   | 339.2   | Q   | 915.5   | 458.3 | 898.5   |         | 7 |
| 4 | 470.3   |       | 453.2   | 452.3   | L   | 787.5   | 394.2 | 770.5   |         | 6 |
| 5 | 541.3   |       | 524.3   | 523.3   | A   | 674.4   | 337.7 | 657.4   |         | 5 |
| 6 | 698.4   | 349.7 | 681.4   | 680.4   | R+1 | 603.4   | 302.2 | 586.3   |         | 4 |
| 7 | 855.5   | 428.2 | 838.4   | 837.5   | R+1 | 446.3   | 223.6 | 429.2   |         | 3 |
| 8 | 968.6   | 484.8 | 951.5   | 950.5   | I   | 289.2   |       | 272.2   |         | 2 |
| 9 | 1,143.6 | 572.3 | 1,126.6 | 1,125.6 | R+1 | 176.1   |       | 159.1   |         | 1 |

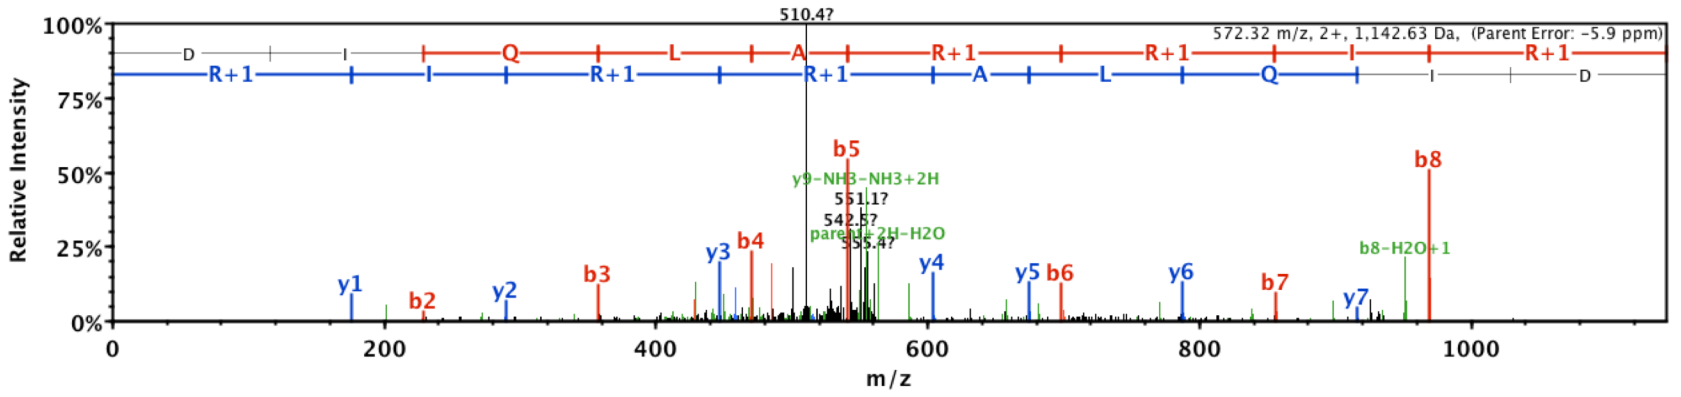

| B | B Ions  | B+2H  | B-NH3   | B-H2O   | AA  | Y Ions  | Y+2H  | Y-NH3   | Y-H2O   | Y |
|---|---------|-------|---------|---------|-----|---------|-------|---------|---------|---|
| 1 | 116.0   |       |         | 98.0    | D   | 1,143.6 | 572.3 | 1,126.6 | 1,125.6 | 9 |
| 2 | 229.1   |       |         | 211.1   | I   | 1,028.6 | 514.8 | 1,011.6 |         | 8 |
| 3 | 357.2   |       | 340.2   | 339.2   | Q   | 915.5   | 458.3 | 898.5   |         | 7 |
| 4 | 470.3   |       | 453.2   | 452.3   | L   | 787.5   | 394.2 | 770.5   |         | 6 |
| 5 | 541.3   |       | 524.3   | 523.3   | A   | 674.4   | 337.7 | 657.4   |         | 5 |
| 6 | 698.4   | 349.7 | 681.4   | 680.4   | R+1 | 603.4   | 302.2 | 586.3   |         | 4 |
| 7 | 855.5   | 428.2 | 838.4   | 837.5   | R+1 | 446.3   | 223.6 | 429.2   |         | 3 |
| 8 | 968.6   | 484.8 | 951.5   | 950.5   | I   | 289.2   |       | 272.2   |         | 2 |
| 9 | 1,143.6 | 572.3 | 1,126.6 | 1,125.6 | R+1 | 176.1   |       | 159.1   |         | 1 |

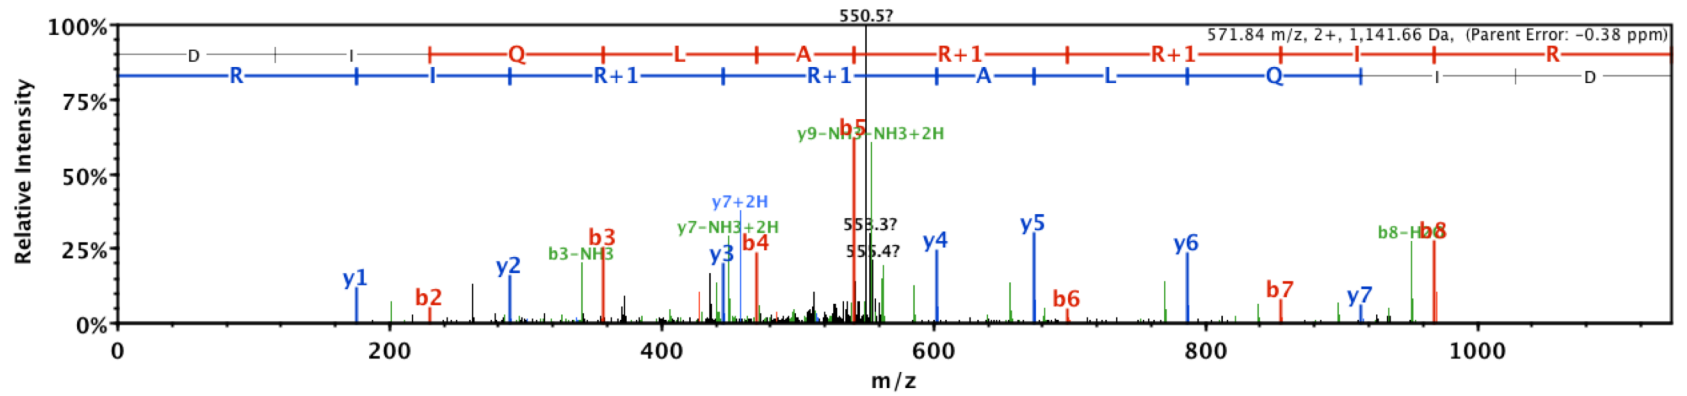

|   | B | B Ions  | B+2H  | B-NH3   | B-H2O   | AA  | Y Ions  | Y+2H  | Y-NH3   | Y-H2O   | Y |
|---|---|---------|-------|---------|---------|-----|---------|-------|---------|---------|---|
| 1 |   | 116.0   |       |         | 98.0    | D   | 1,142.7 | 571.8 | 1,125.6 | 1,124.7 | 9 |
| 2 |   | 229.1   |       |         | 211.1   | I   | 1,027.6 | 514.3 | 1,010.6 |         | 8 |
| 3 |   | 357.2   |       | 340.2   | 339.2   | Q   | 914.6   | 457.8 | 897.5   |         | 7 |
| 4 |   | 470.3   |       | 453.2   | 452.3   | L   | 786.5   | 393.8 | 769.5   |         | 6 |
| 5 |   | 541.3   |       | 524.3   | 523.3   | A   | 673.4   | 337.2 | 656.4   |         | 5 |
| 6 |   | 698.4   | 349.7 | 681.4   | 680.4   | R+1 | 602.4   | 301.7 | 585.3   |         | 4 |
| 7 |   | 855.5   | 428.2 | 838.4   | 837.5   | R+1 | 445.3   | 223.1 | 428.3   |         | 3 |
| 8 |   | 968.6   | 484.8 | 951.5   | 950.5   | I   | 288.2   |       | 271.2   |         | 2 |
| 9 |   | 1,142.7 | 571.8 | 1,125.6 | 1,124.7 | R   | 175.1   |       | 158.1   |         | 1 |



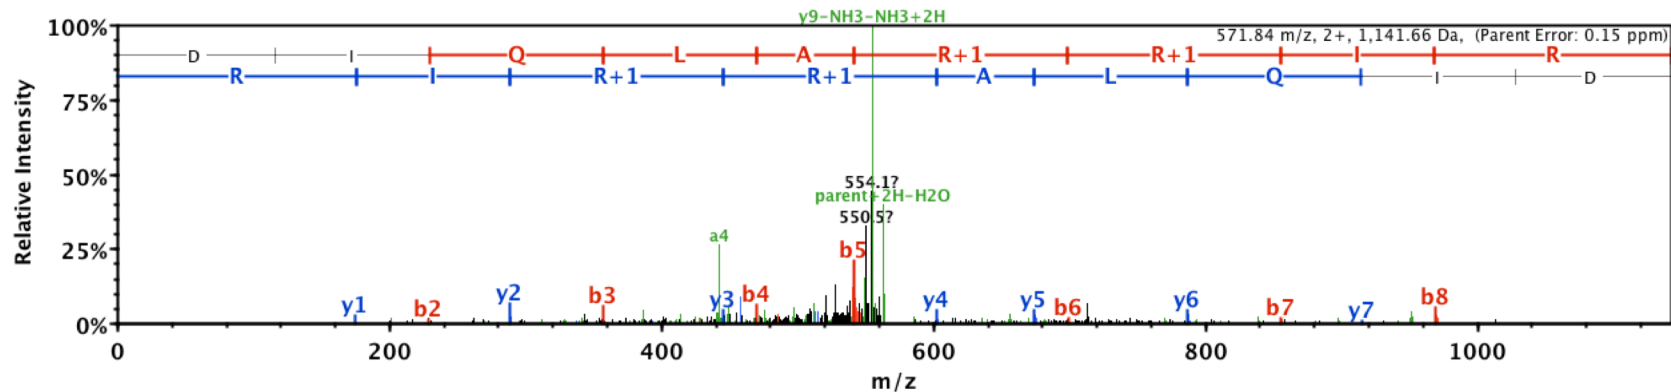

| B | B Ions  | B+2H  | B-NH3   | B-H2O   | AA  | Y Ions  | Y+2H  | Y-NH3   | Y-H2O   | Y |
|---|---------|-------|---------|---------|-----|---------|-------|---------|---------|---|
| 1 | 116.0   |       |         | 98.0    | D   | 1,142.7 | 571.8 | 1,125.6 | 1,124.7 | 9 |
| 2 | 229.1   |       |         | 211.1   | I   | 1,027.6 | 514.3 | 1,010.6 |         | 8 |
| 3 | 357.2   |       | 340.2   | 339.2   | Q   | 914.6   | 457.8 | 897.5   |         | 7 |
| 4 | 470.3   |       | 453.2   | 452.3   | L   | 786.5   | 393.8 | 769.5   |         | 6 |
| 5 | 541.3   |       | 524.3   | 523.3   | A   | 673.4   | 337.2 | 656.4   |         | 5 |
| 6 | 698.4   | 349.7 | 681.4   | 680.4   | R+1 | 602.4   | 301.7 | 585.3   |         | 4 |
| 7 | 855.5   | 428.2 | 838.4   | 837.5   | R+1 | 445.3   | 223.1 | 428.3   |         | 3 |
| 8 | 968.6   | 484.8 | 951.5   | 950.5   | I   | 288.2   |       | 271.2   |         | 2 |
| 9 | 1,142.7 | 571.8 | 1,125.6 | 1,124.7 | R   | 175.1   |       | 158.1   |         | 1 |

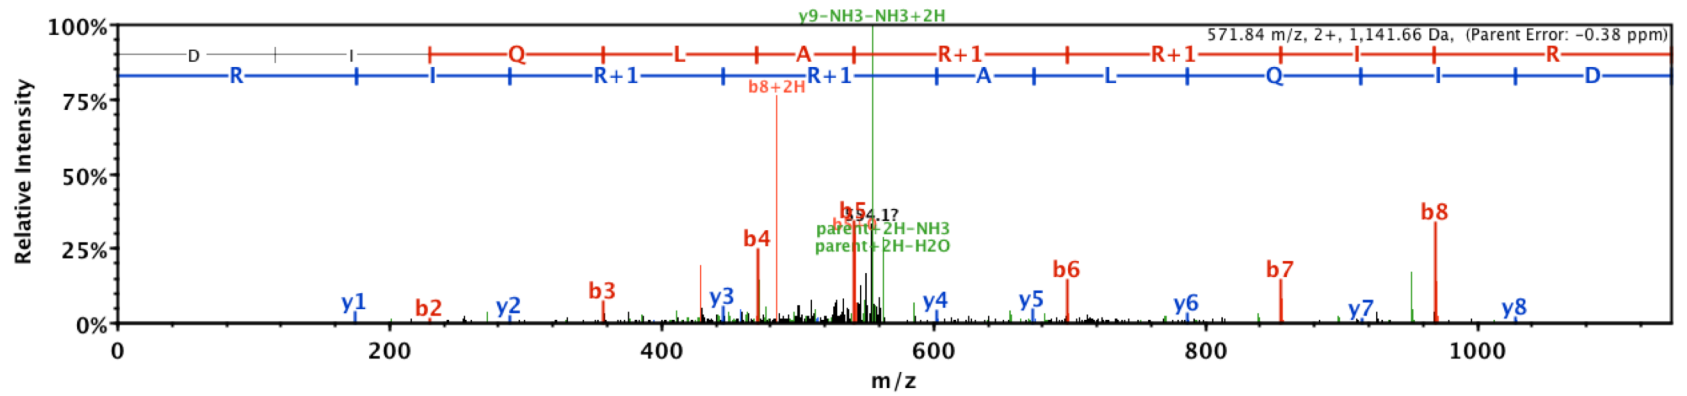

| B | B Ions  | B+2H  | B-NH3   | B-H2O   | AA  | Y Ions  | Y+2H  | Y-NH3   | Y-H2O   | Y |
|---|---------|-------|---------|---------|-----|---------|-------|---------|---------|---|
| 1 | 116.0   |       |         | 98.0    | D   | 1,142.7 | 571.8 | 1,125.6 | 1,124.7 | 9 |
| 2 | 229.1   |       |         | 211.1   | I   | 1,027.6 | 514.3 | 1,010.6 |         | 8 |
| 3 | 357.2   |       | 340.2   | 339.2   | Q   | 914.6   | 457.8 | 897.5   |         | 7 |
| 4 | 470.3   |       | 453.2   | 452.3   | L   | 786.5   | 393.8 | 769.5   |         | 6 |
| 5 | 541.3   |       | 524.3   | 523.3   | A   | 673.4   | 337.2 | 656.4   |         | 5 |
| 6 | 698.4   | 349.7 | 681.4   | 680.4   | R+1 | 602.4   | 301.7 | 585.3   |         | 4 |
| 7 | 855.5   | 428.2 | 838.4   | 837.5   | R+1 | 445.3   | 223.1 | 428.3   |         | 3 |
| 8 | 968.6   | 484.8 | 951.5   | 950.5   | I   | 288.2   |       | 271.2   |         | 2 |
| 9 | 1,142.7 | 571.8 | 1,125.6 | 1,124.7 | R   | 175.1   |       | 158.1   |         | 1 |

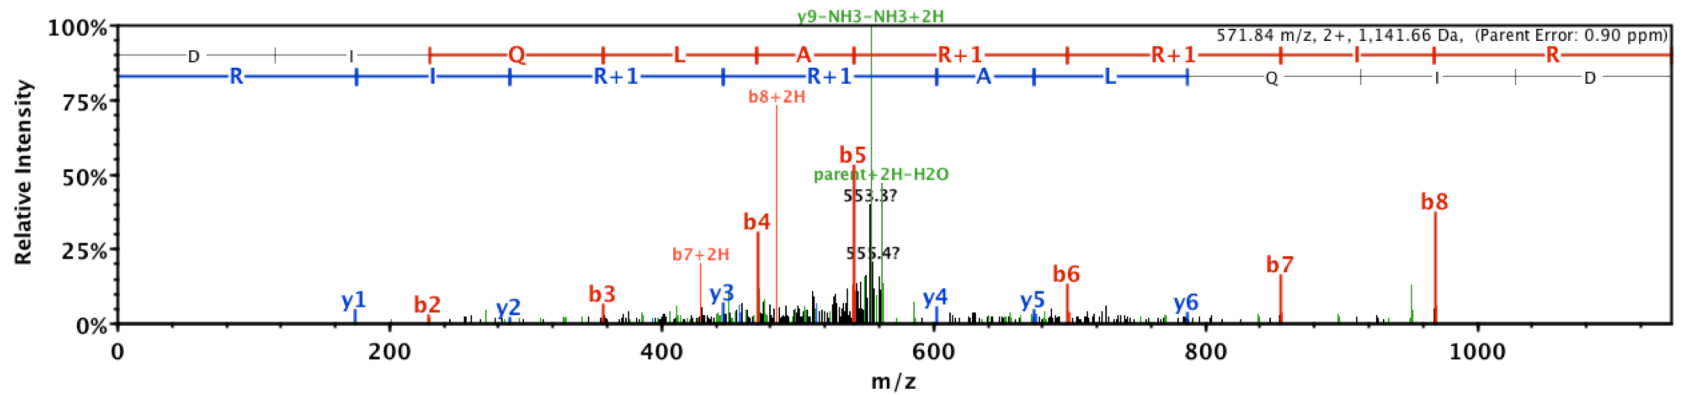

| B | B Ions  | B+2H  | B-NH3   | B-H2O   | AA  | Y Ions  | Y+2H  | Y-NH3   | Y-H2O   | Y |
|---|---------|-------|---------|---------|-----|---------|-------|---------|---------|---|
| 1 | 116.0   |       |         | 98.0    | D   | 1,142.7 | 571.8 | 1,125.6 | 1,124.7 | 9 |
| 2 | 229.1   |       |         | 211.1   | I   | 1,027.6 | 514.3 | 1,010.6 |         | 8 |
| 3 | 357.2   |       | 340.2   | 339.2   | Q   | 914.6   | 457.8 | 897.5   |         | 7 |
| 4 | 470.3   |       | 453.2   | 452.3   | L   | 786.5   | 393.8 | 769.5   |         | 6 |
| 5 | 541.3   |       | 524.3   | 523.3   | A   | 673.4   | 337.2 | 656.4   |         | 5 |
| 6 | 698.4   | 349.7 | 681.4   | 680.4   | R+1 | 602.4   | 301.7 | 585.3   |         | 4 |
| 7 | 855.5   | 428.2 | 838.4   | 837.5   | R+1 | 445.3   | 223.1 | 428.3   |         | 3 |
| 8 | 968.6   | 484.8 | 951.5   | 950.5   | I   | 288.2   |       | 271.2   |         | 2 |
| 9 | 1,142.7 | 571.8 | 1,125.6 | 1,124.7 | R   | 175.1   |       | 158.1   |         | 1 |

# LP9

Derived from human lysozyme

Uniprot ID: B2R4C5

Citrullinated peptides identified when  
incubated with PPAD

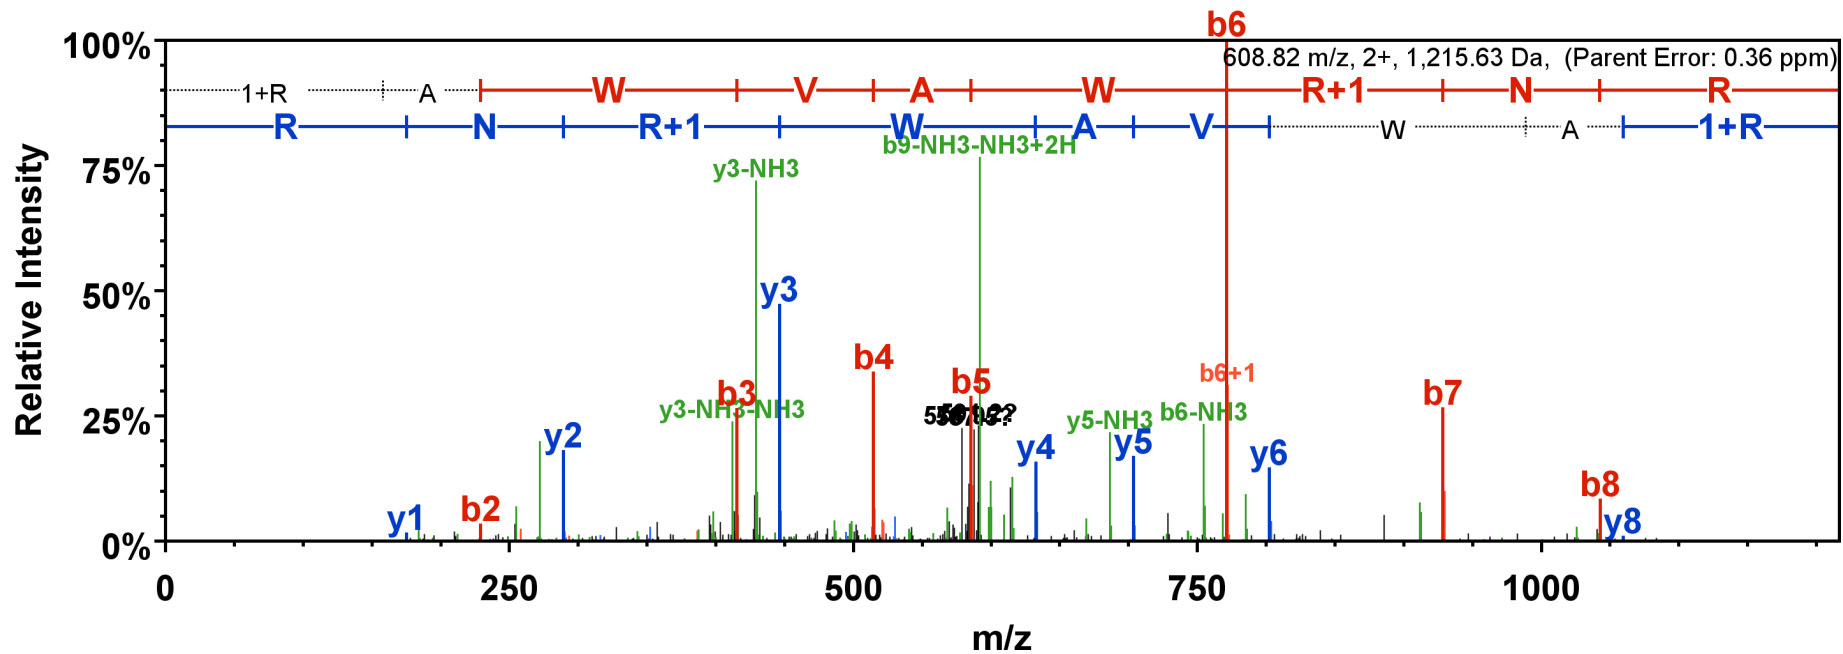

| B | B Ions  | B+2H  | B-NH3   | B-H2O | AA  | Y Ions  | Y+2H  | Y-NH3   | Y-H2O | Y |
|---|---------|-------|---------|-------|-----|---------|-------|---------|-------|---|
| 1 | 158.1   | 79.5  | 141.1   |       | R+1 | 1,216.6 | 608.8 | 1,199.6 |       | 9 |
| 2 | 229.1   | 115.1 | 212.1   |       | A   | 1,059.5 | 530.3 | 1,042.5 |       | 8 |
| 3 | 415.2   | 208.1 | 398.2   |       | W   | 988.5   | 494.8 | 971.5   |       | 7 |
| 4 | 514.3   | 257.6 | 497.3   |       | V   | 802.4   | 401.7 | 785.4   |       | 6 |
| 5 | 585.3   | 293.2 | 568.3   |       | A   | 703.4   | 352.2 | 686.3   |       | 5 |
| 6 | 771.4   | 386.2 | 754.4   |       | W   | 632.3   | 316.7 | 615.3   |       | 4 |
| 7 | 928.5   | 464.7 | 911.5   |       | R+1 | 446.2   | 223.6 | 429.2   |       | 3 |
| 8 | 1,042.5 | 521.8 | 1,025.5 |       | N   | 289.2   |       | 272.1   |       | 2 |
| 9 | 1,216.6 | 608.8 | 1,199.6 |       | R   | 175.1   |       | 158.1   |       | 1 |

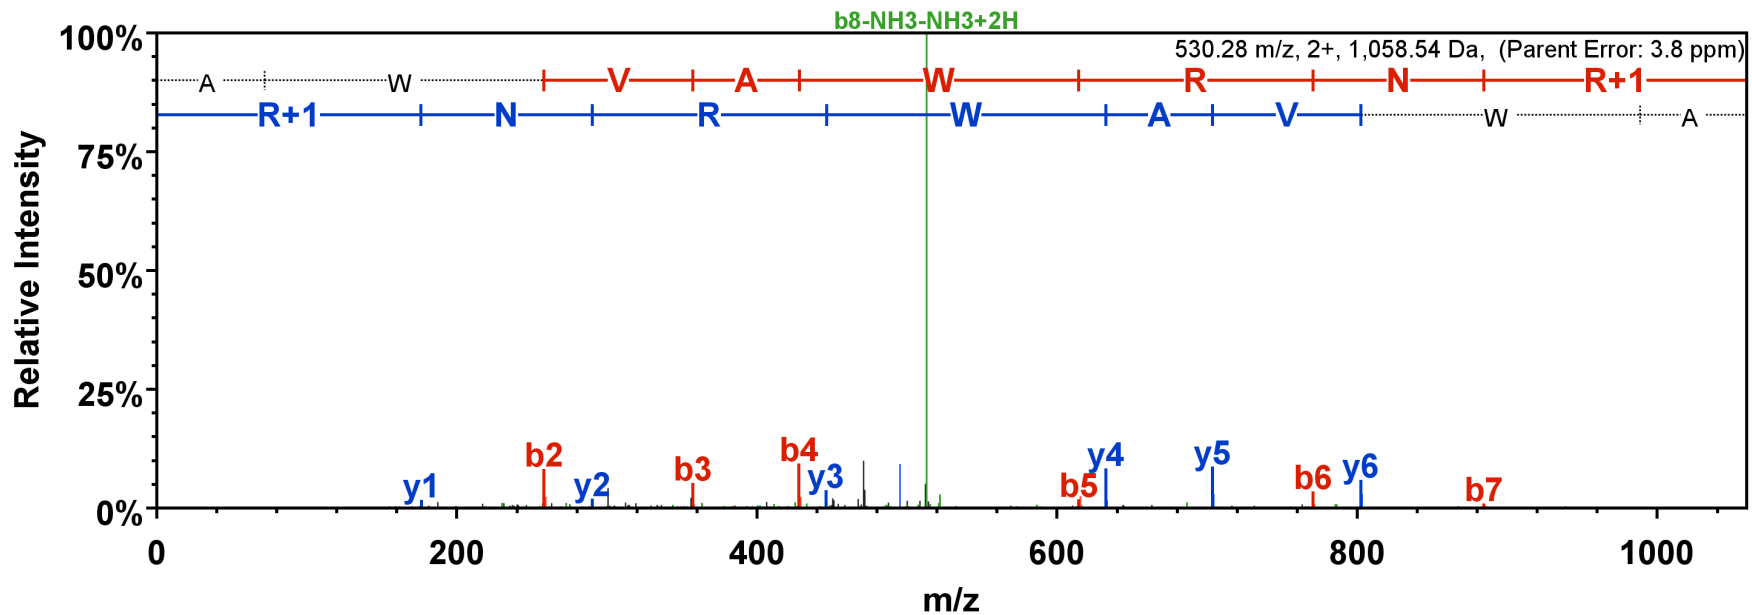

| B | B Ions  | B+2H  | B-NH3   | B-H2O | AA  | Y Ions  | Y+2H  | Y-NH3   | Y-H2O | Y |
|---|---------|-------|---------|-------|-----|---------|-------|---------|-------|---|
| 1 | 72.0    |       |         |       | A   | 1,059.5 | 530.3 | 1,042.5 |       | 8 |
| 2 | 258.1   |       |         |       | W   | 988.5   | 494.8 | 971.5   |       | 7 |
| 3 | 357.2   |       |         |       | V   | 802.4   | 401.7 | 785.4   |       | 6 |
| 4 | 428.2   |       |         |       | A   | 703.4   | 352.2 | 686.3   |       | 5 |
| 5 | 614.3   |       |         |       | W   | 632.3   | 316.7 | 615.3   |       | 4 |
| 6 | 770.4   | 385.7 | 753.4   |       | R   | 446.2   | 223.6 | 429.2   |       | 3 |
| 7 | 884.5   | 442.7 | 867.4   |       | N   | 290.1   |       | 273.1   |       | 2 |
| 8 | 1,059.5 | 530.3 | 1,042.5 |       | R+1 | 176.1   |       | 159.1   |       | 1 |

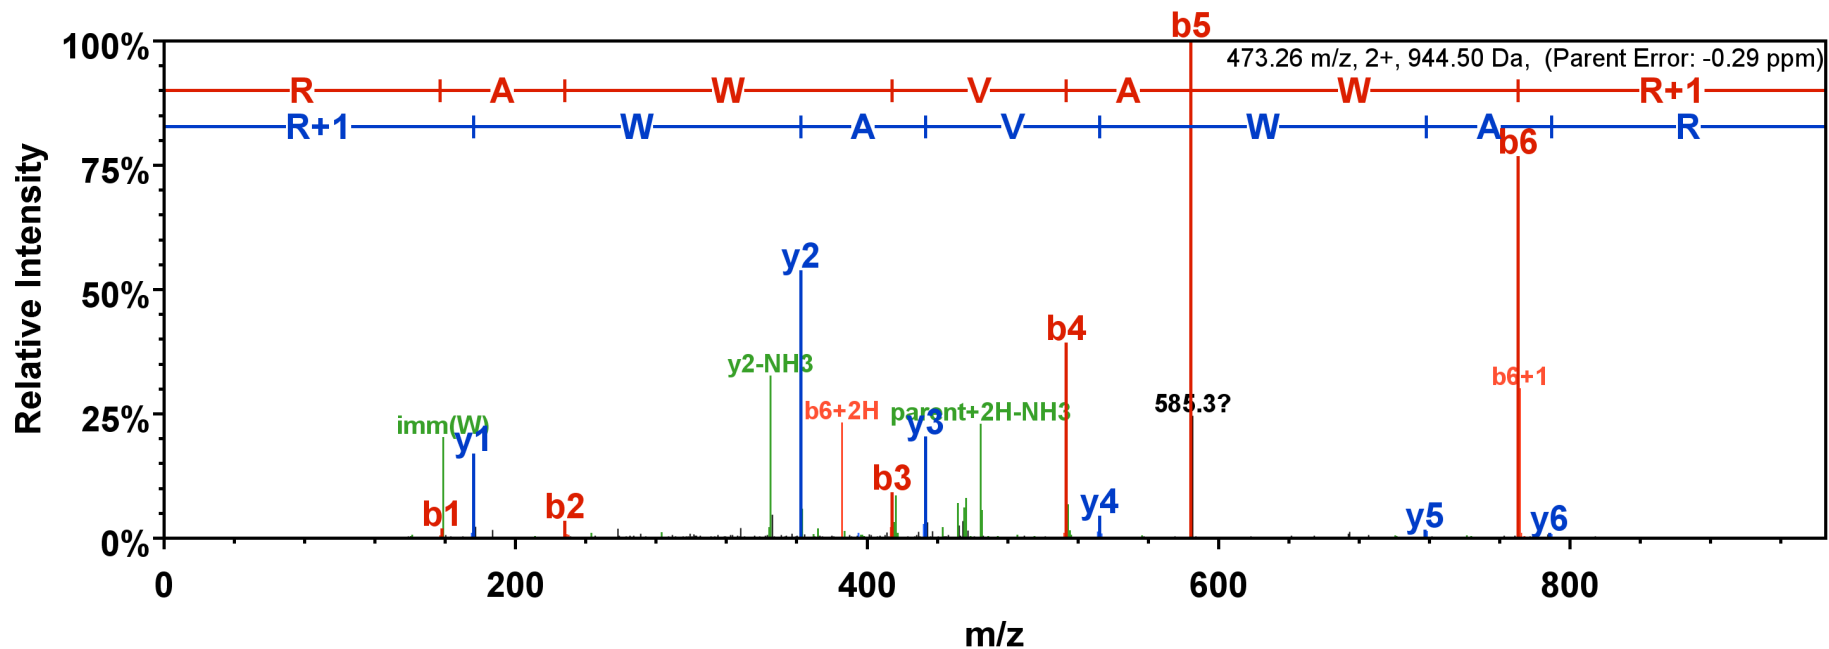

| B | B Ions | B+2H  | B-NH3 | B-H2O | AA  | Y Ions | Y+2H  | Y-NH3 | Y-H2O | Y |
|---|--------|-------|-------|-------|-----|--------|-------|-------|-------|---|
| 1 | 157.1  | 79.1  | 140.1 |       | R   | 945.5  | 473.3 | 928.5 |       | 7 |
| 2 | 228.1  | 114.6 | 211.1 |       | A   | 789.4  | 395.2 | 772.4 |       | 6 |
| 3 | 414.2  | 207.6 | 397.2 |       | W   | 718.4  |       | 701.3 |       | 5 |
| 4 | 513.3  | 257.2 | 496.3 |       | V   | 532.3  |       | 515.3 |       | 4 |
| 5 | 584.3  | 292.7 | 567.3 |       | A   | 433.2  |       | 416.2 |       | 3 |
| 6 | 770.4  | 385.7 | 753.4 |       | W   | 362.2  |       | 345.2 |       | 2 |
| 7 | 945.5  | 473.3 | 928.5 |       | R+1 | 176.1  |       | 159.1 |       | 1 |
