# Supplementary material for: A Secreted Bacterial Peptidylarginine Deiminase Can Neutralize Human Innate Immune Defenses
Source: PubMed Central journal article supplement (PMC6212822; doi:10.1128/mbio.01704-18), 2018-10-30
Supplement: mbo005184137st1.pdf [file mbo005184137st1.pdf]

## Supplementary Table S1

| Protein Name                                 | Uniprot ID  | Impact of PPAD | Normalized Spectral Counts |                         |
|----------------------------------------------|-------------|----------------|----------------------------|-------------------------|
|                                              |             |                | Neutrophils + W83          | Neutrophils + W83 ΔPPAD |
| Actin, cytoplasmic 2                         | ACTG_HUMAN  | ↓              | 23.23                      | 26.12                   |
| Actin-related protein 2/3 complex subunit 1B | ARC1B_HUMAN | →              | 5.40                       | 5.87                    |
| Actin-related protein 2/3 complex subunit 2  | ARPC2_HUMAN | ↓              | 6.26                       | 7.06                    |
| Actin-related protein 2/3 complex subunit 3  | ARPC3_HUMAN | ↓*             | 2.43                       | 5.84                    |
| Actin-related protein 3                      | ARP3_HUMAN  | →              | 14.48                      | 15.26                   |
| Allograft inflammatory factor 1              | AIF1_HUMAN  | ↓              | 2.15                       | 3.77                    |
| Annexin A1                                   | ANXA1_HUMAN | →              | 33.67                      | 34.03                   |
| Annexin A11                                  | ANX11_HUMAN | →              | 8.81                       | 9.12                    |
| Annexin A3                                   | ANXA3_HUMAN | ↑              | 4.67                       | not identified          |
| Azurocidin                                   | CAP7_HUMAN  | ↓              | 25.02                      | 33.53                   |
| Cell division control protein 42 homolog     | CDC42_HUMAN | ↓*             | 5.34                       | 9.38                    |
| Coronin-1A                                   | COR1A_HUMAN | ↓              | 22.21                      | 26.98                   |
| Coronin-1C                                   | COR1C_HUMAN | ↓              | 4.11                       | 5.75                    |
| Dynamin-2                                    | DYN2_HUMAN  | ↓              | not identified             | 3.86                    |
| Gelsolin                                     | GELS_HUMAN  | →              | 9.41                       | 8.55                    |
| Heat shock protein HSP 90-alpha              | HS90A_HUMAN | →              | 8.84                       | 8.76                    |
| Immunoglobulin kappa constant                | IGKC_HUMAN  | ↓              | not identified             | 2.26                    |
| Integrin alpha-M                             | ITAM_HUMAN  | ↓*             | 33.59                      | 40.66                   |
| Integrin beta-2                              | ITB2_HUMAN  | ↓*             | 32.01                      | 45.55                   |
| Myeloblastin                                 | PRTN3_HUMAN | ↓              | 23.44                      | 27.27                   |
| Myosin-9                                     | MYH9_HUMAN  | ↓              | 129.68                     | 147.04                  |
| Neutrophil cytosol factor 2                  | NCF2_HUMAN  | →              | 5.40                       | 5.76                    |
| Neutrophil cytosol factor 4                  | NCF4_HUMAN  | ↓              | not identified             | 2.35                    |
| Neutrophil elastase                          | ELNE_HUMAN  | →              | 56.21                      | 54.89                   |
| Sorting nexin-3                              | SNX3_HUMAN  | ↓              | not identified             | 1.67                    |
